# Supplementary material for: Crustal structure of southeast Australia from teleseismicreceiver functions
Source: Copernicus journal article supplement (doi:10.5194/se-2020-74), 2020-07-08

## Response to reviewer comments on “Crustal structure of southeast Australia from teleseismic receiver functions” (manuscript se-2020-74) by Bello et al.

We thank the two reviewers for their constructive comments. The revision process has been delayed somewhat due to the lead author being unable to contribute due to health reasons. However, the co-authors feel that the updated version of the manuscript does address the primary comments and concerns of both reviewers, and is a distinct improvement on the original.

**Note:** Reviewer comments are in Blue text, and author responses are in black text. Line numbers refer to the marked up version of the manuscript.

### Reviewer #1

**Comment:** In the present manuscript, the authors calculated and evaluated Ps receiver functions at a total of 32 seismic stations in southeast Australia, most of them situated along both sides of Bass Strait (Victoria and Tasmania). They applied H-K stacking and receiver function inversion using the neighborhood algorithm, relatively standard techniques that have already been applied to different datasets in E and SE Australia.

The performed processing and analysis was carried out competently, the obtained results appear to be mainly solid, and the manuscript is overall well written. However, I have large reservations about the study's significance. It basically just provides a few (way fewer than is apparent at first glance, see comments below) new data points that do not really show us anything new, and it also does not attempt to gain new insights by combining the obtained information with other existing evidence in a meaningful and potentially novel way. I thus think that the study should not be published in its current shape, but the authors should be encouraged to submit an extended and improved version of the study that tries to, at least, improve on point 2 of my General comments (see below).

**Response:** We thank the reviewer for their constructive criticism of the manuscript. We acknowledge that the receiver function results we obtain only represent a portion of the stations for which data are available, but we were very careful to remove poor quality data, and this resulted in fairly substantial culling of the dataset, which is inherently noisy due to the proximity of most stations to Bass Strait and the Southern Ocean. An extensive re-examination of the data has been made in response to this point, including re-processing the receiver functions and a less automated assessment. As a result, we have been able to add an additional four H- $\kappa$  stacking results for the portable network (stations BA03, BA09, BA19 and BA20) and eight NA inversion results for the portable network (BA02, BA07, BA08, BA09, BA13, BA17, BA19 and BA20) – see the revised Table 2. These new results make a substantial contribution to the revised paper, and has meant that the Abstract, Discussion and Conclusion sections have been substantially modified. We also take the point regarding the exploitation of existing evidence to improve our interpretation, and have put considerable effort towards achieving this in the revised manuscript.

**Comment:** As mentioned above, my main concern with this paper is its lack of significance. This can be broken down into two problems:

#### 1. Data paucity and lack of novel results

The abstract talks about receiver functions from 32 stations (24 temporary from the BASS deployment, 8 permanent), but H-K results are only supplied for 13 stations (7 temporary, 6 permanent; the text says 14 stations but Table 2 only features 13), inversion results only for 6 (only permanent stations).

What the manuscript does not mention is that Moho depth estimates from receiver functions are already available from literature for 5 of the 6 permanent stations investigated (station CAN in Clitheroe et al., 2000; stations MOO, TOO, TAU, YNG in Ford et al., 2010; all 5 are also used in the AusMoho compilation of Kennett et al., 2011), and vp and vp/vs estimates for 4 of the 6 (Ford et al., 2010). This reduces the amount of new results to H-K stacking results from 7 temporary stations, and H-K stacking plus inversion for one permanent station (CNB) for which I could not find previous results.

This is a rather thin data base, and I think the authors should have mentioned the previous results I just listed, and discussed whether their new values agree or disagree with these previous findings (they are largely consistent, as far as I can see). Failure to do that appears to wrongly imply that all reported values are novel. Comparison is only undertaken with other previously analyzed stations in the region (Figure 9), which adds to this impression. Lastly, it would make sense to compare the obtained crustal thicknesses to the Australia-wide Moho model AusMoho (freely available from the webpage of ANU: <http://rses.anu.edu.au/seismology/AuSREM/AusMoho/>). This interpolated model offers predictions (interpolated values) for the positions of the newly analysed stations, thus it offers the possibility to check whether these results change or confirm the current state of knowledge (at first glance, they rather confirm).

**Response:** We acknowledge that what we wrote could be interpreted as a claim that we obtain receiver functions from all 32 stations, so have added a subsequent sentence that clarifies the actual number of usable receiver functions we extract (see lines 13-15). As noted above, we have reassessed the temporary station data, and applied different receiver function assessment criteria, which has yielded additional results that we hope will help allay the reviewer's concern regarding data paucity.

In response to the second point, we now make mention of the previous Moho depth estimates for five of the six permanent stations, and show that they are consistent with our results. See lines 398-407.

In response to the last point, we have added a new figure (Figure 11) which compares all of our Moho depth results with AusREM estimates. As the reviewer notes, they are in general quite consistent, but with a few exceptions that we discuss in a new section (7.3) in the manuscript – see lines 560-597.

#### **Comment: 2. Lack of constraints for interpretation**

The authors offer a detailed introduction to models of crustal formation and geologic evolution of SE Australia in Sections 1 and 2. I am no expert in these things, but I get the impression that a thorough survey of the literature was performed. The Discussion section then attempts to relate the rather poor data base (see above) to all kinds of geological processes that have been previously proposed. I think the authors are doing an OK job in relating their results to some published works, but the central problem is that the few newly obtained data are mostly interpreted in isolation. It would make a lot of sense to do cross plots with results from other geophysical studies, trying to see more by combining different datasets. This is not done at all, which is even more surprising considering that the first author published two other seismological studies on the same area, even partially using the same stations, last year (Bello et al., 2019a,b; teleseismic tomography and shear-wave splitting). While both of these methods rather illuminate deeper, sub-crustal structure, a combined interpretation would allow a much better discussion and potentially offer novel insights. I wonder why this is not done here, unless the authors want to publish this in yet another paper (which would be slicing it rather thinly). Looking at these previous papers, I also wonder why there was no attempt to use at least some of the huge number of WOMBAT temporary stations that was

harvested for the teleseismic tomography in the present study, to derive some more (novel) data points.

**Response:** The reviewer makes a fair point with regard to the lack of comparison with the results from other relevant studies. As a consequence, we have made the following changes:

1. As noted above, we now compare our results with the AuSMoho model (Figure 11 and Section 7.3).
2. We also compare our results in Tasmania to the study of Rawlinson et al. (2001) who invert wide-angle traveltimes (both reflection and refraction) for crustal velocity and Moho geometry (see Supplementary Figure S9).
3. We also include a new figure, which provides a joint interpretation of our results from teleseismic tomography, shear wave splitting and receiver function analysis (see Figure 12) and discuss it in detail in a new section (7.4) – see lines 598-623.

With regard to the last point, the WOMBAT stations were all short period stations (1 Hz corner frequency), many were only vertical component, and deployment times were often less than a year. All the Victorian stations and those deployed in northern Tasmania were vertical component, which means that it was not possible to extract receiver functions from them.

**Comment:** ll.24/25: I found it rather confusing that the authors talk about vp/vs ratio and Poisson ratio separately (here and also in Section 7.2), although these properties are directly related (see Equation 2) and thus one does not offer additional information compared to the other.

**Response:** We agree with the reviewer's comment, and have revised the manuscript so that it just refers to  $V_p/V_s$  ratio (see Abstract and Section 7.2).

**Comment:** ll.54-57: Some parts of a sentence are apparently missing here.

**Response:** As far as we can tell, the sentence in question appears to be complete. However, we have broken it up into two sentences, which hopefully improves its clarity (see lines 67-71).

**Comment:** ll.93-100: If VanDieland is just a conceptual microcontinental block in one of the models that is routinely used to explain the genesis of the region, why is the term used to reference station locations (e.g. Table 2). Shouldn't geographical regions that are independent of interpretation framework be used for this?

**Response:** This is a fair point, and we have now removed such references (e.g. Table 2).

**Comment:** ll.102-154 (Section 3): I personally dislike this type of listing of existing studies, going study by study and explaining the methodology of each. This is unnecessarily bloated and in the end the reader doesn't take away much beyond "people have worked in this area before". It would be better to include the geophysical evidence into the presentation of evolution concepts given in Section 2 (and partly Section 1).

**Response:** We think it is worthwhile to summarise the results of previous geophysical studies, so have retained this section. However, we do acknowledge the reviewer's point, and therefore have changed it considerably to focus more on the outcomes of these studies. This includes largely removing the first paragraph, which merely lists the range of techniques that have been applied and relevant references. See lines 116-185 of the revised manuscript.

**Comment:** l.152: part of the sentence is missing (?)

**Response:** This sentence appears to be complete as far as we can tell.

**Comment:** ll.174/175: I disagree on this claim

**Response:** We have deleted this sentence (see lines 221-222).

**Comment:** l.185: "by using the clarity of the direct arrivals"; was this a purely visual selection or were there fixed criteria? Some more detail would be useful.

**Response:** We have added "visual clarity" to the sentence in question (see line 240).

**Comment:** l.208: Although the paper of Zhu and Kanamori (2000) is cited here, the used weighting scheme (0.6/0.3/0.1) is not the same as in that paper (0.7/0.2/0.1).

**Response:** We have removed the citation (see line 270-271).

**Comment:** l.213: How robust is the use of standard deviations as uncertainty estimates when there are only 4-6 measurements (as is the case for 5 of the 13 stations, see Table 2)? This should at least be mentioned/discussed.

**Response:** This is a fair point, and we have added an additional sentence to explain the limitations of this approach (see lines 276-278).

**Comment:** l.240: "Our strict criteria ...": what were these criteria? It would be worth explaining how this was done, especially since it leads to a reduction from 32 to 6 stations.

**Response:** We have rephrased this sentence to make it clear that we are using visual criteria for acceptance (see line 305-306).

**Comment:** l.243: Why have a subchapter 5.3.1 if there is no 5.3.2?

**Response:** We have removed this heading (see line 308).

**Comment:** l.294ff: Why is it not even mentioned that there is a huge difference in Moho depth between the two different applied analysis techniques (H-K and inversion) for all (3) stations in the Lachlan Fold Belt that were investigated with both methods (see Table2)? These differences are around 10 km, thus very significant.

**Response:** We have revisited these Moho picks from the NA inversion, and determined that they were not done correctly. As can be seen in Table 2, they have been changed, with YNG H- $\kappa$  depth=37 km, NA depth=35km; CAN H-  $\kappa$  depth=39 km, NA depth=40 km; CNB H $\kappa$  - depth=38 km, NA depth=39 km. However, it is worth noting that previous RF inversion results have favoured a Moho that is ~10 km deeper beneath this region. We have discussed this in Section 7.1 – see lines 432-440.

**Comment:** Figures 6 and 9: I find the black-to-white color scale not to be a very good choice here, it is quite hard to see at a glance where e.g. the crust is thick and where thin. A different color scale may be more appropriate.

**Response:** These figures have been redone using a colour scale that makes it easier to distinguish between thick and thin crust - see Figures 6 and 10.

**Comment:** Figures 7 and 8: It would be useful to show where the Moho was picked in the shear-wave velocity models. Taking the values from Table 2, I actually disagree with the picks for stations YNG and CAN. In both of these cases, the clearer jump in vs is much shallower than what is listed in Table 2 (around 35 and 40 km instead of 48 and 49km), which would also be much more consistent with H-K results.

**Response:** The pick locations have now been included in Figures 7-9, noting that we also include two example RF inversions from the temporary array in the new Figure 9. As noted in a previous comment, the original picks for YHG, CAN and CNB were too deep, and have been revised, so the reviewer is correct. However, please also refer to lines 432-440 of the manuscript for an explanation of why the precise Moho depth might be difficult to estimate here.



## Reviewer #2

**Comment:** This carefully researched and well-written contribution places solid constraints on the crustal structure of southeast Australia by the construction and inversion of teleseismic receiver functions underneath a series of high-quality seismic stations. Building on these results for the thickness and sharpness of the crust, the authors put forward a tectonic interpretation, or rather a substantiation of earlier geological theories, involving magmatic underplating, which places the structure of the region into a proper geodynamic context.

I have relatively little to offer in the form of scientific criticism or comments on the seismological methods, which are sound, well-established, and well executed, although I am making a number of suggestions related to the presentation of the materials.

I am judging the paper primarily on its seismological merits, and not on the finer points of the interpretation. My main point related to the interpretation is that the comparison with earlier results by other authors is mostly qualitative, in the form of a color-coded figure, where I would have preferred a more detailed cross-comparison including a statistical analysis of uncertainty. How different can two crustal models made at two nearby stations be before tension develops with the interpretation? How different can two crustal models made at the same station be before we must dig into the details in order to interpret one of them as “better”, or both of them as “equivalent”? The authors leave a bit of material on the table here.

I am attaching a hand-annotated manuscript. I will number and restate my most important comments here. I will not repeat “obvious” but necessary corrections here.

**Response:** We thank the reviewer for the positive comments, and in the revised manuscript, attempt to improve on the quantitative nature of the comparison with previous results.

**Comment:** L261 What are those degrees of freedom, how do you determine them? The reference to Gouveia and Scales is too vague.

**Response:** The degrees of freedom is equal to the number of observations minus the number of inversion parameters, which we now state in the manuscript (see lines 328-329).

**Comment:** L310 In the same vain. I know it is hard to formally justify, but if you have the right number of degrees of freedom, and you have the right amount of independence in the entries of the summand, the reduced-chi-squared value that you should be aiming for is 1. Are you looking at the distribution of your misfits to establish that they ARE indeed chi-squared distributed? Are you sure that you are using the right amount of degrees of freedom? Are you sure that your lowest chi-squared values are not overly optimistic (as in: that they could be nearly perfect fits to models with too many free parameters).

**Response:** This is a fair point, and ideally one would be aiming for a value of 1 to fit the data. However, apart from getting the number of degrees of freedom right, the noise estimate is also a factor, and its absolute value is poorly constrained. This may be why the chi-square values are on the low side, but we think it is reasonable to consider our measure of chi-square as a relative indicator of data fit, which we now acknowledge on lines 393-397. It is also worth noting that it is fairly typical of NA RF inversion studies to end up with chi-square misfit values well below 1 (e.g. Wu et al., 2015: Crustal shear wave velocity structure in the northeastern Tibet based on the Neighbourhood algorithm inversion of receiver functions. *Geophysical Journal International*, **212**, 1920-1931)

**Comment:** L832 I assume we are talking about the same criterion here, and so the caption should explicitly refer to it.

On the whole, I would like to read more about your misfit criterion, and I would like you to make explicit the now implicit distributional assumptions made about your metric.

**Response:** Yes, this is the same misfit measure, which is now clarified in the paper (see line 1014).

**Comment:** L831 I definitely would put the numbers in call-out boxes on the maps also. A color scale is hard to read for some, and any additional clarity that can be gleaned from a multiplicity of representation is to be welcomed.

**Response:** We now point out the depth values on the plots.

**Comment:** L835 Let the caption teach us how to read the top and bottom axes in the left-hand panel.

**Response:** We have changed the caption as requested (see line 1012).

**Comment:** L850 Again, it is hard to see differences when they are presented on a busy colored map in a smooth gray-scale representation. A table would be nice in the main text. Spell out the differences, attempt to make sense of them relative to their uncertainty and their spatial proximity. Make us confident that your study is not just “another opinion”, make us confident that other studies weren’t just “another study”, in other words: integrate the results of your and other studies and talk us through the similarities and differences. In the text, emphasize the common points and the differences, in particular in light of the interpretation.

**Response:** We have changed the relevant figures (Figure 6 and 10) to make it easier to read the variations in Moho depth, and changed the discussion to make it more integrated, along the lines suggested by the reviewer. Table 2 also provides a quantitative summary of all our new results.

**Comment:** L10, L15, L26 “understanding”, “this”, “explains” -> those are all vague terms. After reading the manuscript it became clear to me that you had more detail in mind, some of which you have room to put into the abstract.

**Response:** We have made some modifications to the Abstract to improve upon clarity.

**Comment:** L17 “postulated Precambrian continental” -> I propose “putative” if the postulate refers to the fragment being “continental” or “putatively” if it refers to being “Precambrian”.

**Response:** We have implemented this change (see line 21).

**Comment:** L50, L55 -> Establish a consistent notation and typographical conventions

**Response:** This has been done.

**Comment:** L150, L152, L186, L186 -> Fix typos and inconsistencies

**Response:** This has been corrected.

**Comment:** L287 “relatively average to high” -> we need a basis for comparison, and a different word than “average” - in my book, values are not “average” unless they are “averages”, and you most likely mean that these values are “unremarkable”, “usually/frequently observed” (compared to what then?)

**Response:** The paragraph containing this text has been deleted as part of the revisions.

**Comment:** L325 -> Fix typo/inconsistency

**Response:** Typo has been corrected.

**Comment:** L376 There is a lack of referencing in this sentence, which must refer to specific studies for each of the assertions made in it. Also “depicted” is not the greatest choice of word here.

**Response:** We have replaced “depicted” with “revealed”, and included a reference to the work of Christensen (1996). The reference to Owens and Zandt (1997) in the second point refers to the relationship between partial melt and Poisson’s ratio. See lines 487-489.

**Comment:** L447 -> Fix typo/inconsistency

**Response:** Done.

**Comment:** L777, L788, L791, L809 -> Fix capitalization

**Response:** Done

**Comment:** L798 Personally I would leave ETOPO1 out of the caption unless I was willing to put a color scale to it. At this scale and with this projection and without a color scale it’s immaterial what topography model is being used.

**Response:** We agree, but it is a journal requirement to state the source of any information we use in figures that was obtained from outside the current study.

**Comment:** L802 I would label the phases with letters on the graph also, right now the colors are not all that distinct on the screen, and they won’t be on a black and white printer or photocopier, either.

**Response:** This suggestion has been implemented – see Figure 4.

**Annotated manuscript:** We also implemented the minor hand-annotated suggestions in the manuscript provided by Reviewer 2, which were mainly typos and other straight forward edits.

# 1 Crustal structure of southeast Australia from teleseismic 2 receiver functions

3 Mohammed Bello<sup>1, 2</sup>, David G. Cornwell<sup>1</sup>, Nicholas Rawlinson<sup>3</sup>, Anya M. Reading<sup>4</sup>, Othaniel  
4 K. Likkason<sup>2</sup>

5 <sup>1</sup>Department Geology & Geophysics, University of Aberdeen, Aberdeen, UK

6 <sup>2</sup>Department of Physics, Abubakar Tafawa Balewa University, Bauchi, Nigeria

7 <sup>3</sup>Department of Earth Sciences, University of Cambridge, UK

8 <sup>4</sup>School of Natural Sciences (Physics), University of Tasmania, Australia

9 *Correspondence to:* Mohammed Bello (mbazare13@yahoo.com)

10 **Abstract.** In an effort to improve our understanding of [the seismic character of the crust beneath southeast](#)  
11 [Australia, and southeast Australia's enigmatic tectonic evolution how it relates to the tectonic evolution of the](#)  
12 [region](#), we analyse teleseismic earthquakes recorded by 24 temporary and 8 permanent broadband stations using  
13 the receiver function method. [Due to the proximity of the temporary stations to Bass Strait, only 13 of these](#)  
14 [stations yielded usable receiver functions, whereas seven permanent stations produced receiver functions for](#)  
15 [subsequent analysis](#). Crustal thickness, bulk seismic velocity [properties](#) and internal crustal structure of the  
16 southern Tasmanides – an assemblage of Palaeozoic accretionary orogens that occupy eastern Australia – are  
17 constrained by ~~our new~~ [H-κ stacking and receiver function inversion, results](#) which point to: (1) ~~a~~ [~39.0 ± 0.5](#)  
18 ~~km thick crust, a relatively n intermediate-high Vp/Vs ratio high Poisson's ratio (~1.70-1.76) 0.262 ± 0.014,~~  
19 [relative to ak135](#), and a broad (>10 km) crust-mantle transition beneath the Lachlan Fold Belt. ~~These results are~~  
20 ~~interpreted is interpreted~~ to represent magmatic underplating of mafic materials at the base of the crust; (2) a  
21 complex crustal structure beneath VanDieland, a ~~putative~~ [ostulated](#) Precambrian continental fragment embedded  
22 in the southernmost Tasmanides, ~~where the crust thickens (37.5 ± 1.2 km) towards the northern tip of the~~  
23 ~~microcontinent as it enters south central Victoria but thins south into Bass Strait (30.5 ± 2.1 km), before once~~  
24 ~~again becoming thicker beneath western Tasmania (33.5 ± 1.9 km), which features strong variability in crustal~~  
25 ~~thickness (23-37 km) and Vp/Vs ratio (1.65-1.93), the latter of which likely represents compositional variability~~  
26 ~~and the presence of melt. The thinner crust beneath Bass Strait can be attributed to lithospheric stretching that~~  
27 ~~resulted from the break-up of Antarctica and Australia and the opening of the Tasman Sea; The complex origins~~  
28 ~~of Vandieland, which comprises multiple continental ribbons, coupled with recent failed rifting and intraplate~~  
29 ~~volcanism, likely contributes to these observations; and~~ (3) stations located in the East Tasmania Terrane and  
30 ~~e~~ [Eastern Bass Strait \(ETT+EB\)](#) collectively indicate crust of uniform thickness (~~31-32~~ [~33](#) km), ~~and a slightly~~  
31 ~~broad Moho transition that reflect a possible underplating event associated with a Palaeozoic subduction~~  
32 ~~system which clearly distinguish it from VanDieland to the west. The relative uniformity of Vp/Vs and Poisson's~~  
33 ~~ratio in VanDieland — suggesting uniformity in composition — could be used in support of the VanDieland~~  
34 ~~microcontinental model that explains the tectonic evolution of southeast Australia. Moho depths are also~~  
35 ~~compared with the continent-wide AusMoho model in southeast Australia, and are shown to be largely~~  
36 ~~consistent, except in regions where AusMoho has few constraints (e.g. Flinders Island). A joint interpretation of~~  
37 ~~the new results with ambient noise, teleseismic tomography and teleseismic shear wave splitting anisotropy,~~  
38 ~~helps provide new insight into the way that the crust has been shaped by recent events, including failed rifting~~

39 [during the break-up of Australia and Antarctica and recent intraplate volcanism.](#)

40 **Keywords:** receiver functions, crustal structure, VanDieland, Bass Strait, SE Australia

## 41 **1 Introduction**

42 The Phanerozoic Tasmanides (Collins and Vernon, 1994; Coney, 1995; Coney et al., 1990) comprise the eastern  
43 one-third of the Australian continent and through a process of subduction accretion were juxtaposed against the  
44 eastern flank of the Precambrian shield region of Australia beginning in the Late Neoproterozoic and Early  
45 Palaeozoic (Foster and Gray, 2000; Glen, 2005; Glen et al., 2009; Moresi et al., 2014) ([Figure- 1](#)). Persistent  
46 sources of debate that impede a more complete understanding of the geology of the Tasmanides include: (1) the  
47 geological link between Tasmania – an island state in southeast Australia – and ~~—~~mainland Australia, which are  
48 separated by the waters [of](#) Bass Strait; and (2) the presence and locations of continental fragments from  
49 Rodinian remnants that are entrained within the accretionary orogens. Furthermore, the lateral boundaries  
50 between individual tectonic blocks and their crustal structure are often not well defined. To date, few constraints  
51 on crustal thickness and seismic velocity structure have been available for regions such as Bass Strait.  
52 Constraints on the Moho transition, crustal thickness and velocity structure beneath Bass Strait derived from  
53 receiver functions (RFs) can therefore provide fresh insight into the nature and evolution of the Tasmanides.

54 Previous estimates of crustal thickness and structure beneath southeastern Australia have been obtained from  
55 deep seismic reflection transects, wide-angle seismic data, topography and gravity anomalies (e.g. Collins,  
56 1991; Collins et al., 2003; Drummond et al., 2006 and Kennett et al., 2011). Earlier RF studies in southeast  
57 Australia (Shibutani et al., 1996; Clitheroe et al., 2000; Tkalčić et al., 2011; Fontaine et al., 2013a,b) suggested  
58 the presence of complex lateral velocity variations in the mid-lower crust that probably reflect the interaction of  
59 igneous underplating, associated thinning of the lithosphere, recent hotspot volcanism and uplift. Furthermore,  
60 the intermediate to high crustal  $V_p/V_s$  ratio of 1.70–1.78 in this region (Fontaine et al., 2013a), relative to  $V_p/V_s$   
61 continental crust where  $V_p/V_s$  is  $\sim 1.68$ , may indicate a mafic composition that includes mafic granulite rocks,  
62 granite-gneiss and biotite gneiss. Body- and surface-wave tomography (Fishwick and Rawlinson, 2012;  
63 Rawlinson et al., 2015) revealed [ed](#)  $P$  and  $S$  wave velocity anomalies in the uppermost mantle beneath Bass Strait  
64 and the Lachlan Fold Belt. Ambient noise surface wave tomography (Bodin et al., 2012b; Young et al., 2012;  
65 Pilia et al., 2015b, 2016; Crowder et al., 2019) of the southern Tasmanides reveal [eds](#) significant crustal  
66 complexity, but is unable to constrain crustal thickness or the nature of the Moho transition.

67 The goal of this paper is to provide fresh insight into the crust and Moho structure beneath the southern  
68 Tasmanides using  $P$ -wave RFs [and](#), explain the origin of the lateral heterogeneities that are observed. [This will](#)  
69 ~~allow us to and~~ explore the geological relationship between the different tectonic units that constitute the  
70 southern Tasmanides, [and yielddevelop an improved understanding of the region's tectonic history thereby](#)  
71 ~~facilitating a better grasp of the region's tectonic history.~~

## 72 **2 Geological setting**

73 The Palaeozoic-Mesozoic Tasmanides of eastern Australia form part of one of the most extensive accretionary  
74 orogens in existence and evolved from interaction between the East Gondwana margin and the Proto-Pacific

75 Ocean. The tectonic evolution of the Tasmanides is complex and large-scale reconstructions have proven  
76 difficult. This is evident from the variety of models that have been suggested to explain how the region formed  
77 (Foster and Gray, 2000; Spaggiari et al., 2003; Teasdale et al., 2003; Spaggiari et al., 2004; Boger and Miller,  
78 2004; Glen, 2005; Cawood, 2005; Glen et al., 2009; Cayley, 2011[a,b](#); Gibson et al., 2011[+](#); Moresi et al., 2014;  
79 Pilia et al., 2015a,b). Particular challenges arise from multiple subduction events, multiple phases of  
80 metamorphism, entrainment of exotic continental blocks, the formation of large oroclinal, recent intraplate  
81 volcanism and subsequent events, including the separation of Antarctica and Australia and the formation of the  
82 Tasman Sea. These challenges are compounded by the presence of widespread sedimentary sequences that  
83 hinder direct access to basement rocks (Fig. 1).

84 The Tasmanides consist of four orogenic belts, namely the Delamerian, Lachlan, Thomson and New England  
85 Orogens. The Delamerian Orogen - located in the south - is the oldest part of the Tasmanides and has a  
86 southward extension across Bass Strait from Victoria into western Tasmania, where it is commonly referred to  
87 as the Tyennan Orogen (Berry et al., 2008). Between about 514 and 490 Ma, the Precambrian and Early  
88 Cambrian rocks that constitute the Delamerian Orogen were subjected to [a](#) contractional orogenic event along  
89 the margin of East Gondwana (Foden et al., 2006). Subsequently, the Lachlan Orogen formed in the east, which  
90 contains rocks that vary in age from Ordovician to Carboniferous (Glen, 2005). Gray and Foster (2004) argued  
91 for a tectonic model ~~for of~~ the Lachlan Orogen that involved interaction of a volcanic arc, oceanic microplates,  
92 several turbidite thrust systems and three distinct subduction zones. Each subduction zone is linked to the  
93 formation of [a](#) distinct tectonic terrain: the Stawell-Bendigo zone, Tabbarebbera zone and Narooma accretionary  
94 complex. The limited rock exposure in the Tasmanides as a whole has made direct observation of the Lachlan  
95 Orogen difficult; this is attributed to a large swath of Mesozoic-Cenozoic sedimentary cover and more recent  
96 Quaternary volcanics, which obscure a large portion of the underlying Palaeozoic terrane. However, the Lachlan  
97 Orogen contain belts of Cambrian rocks in Victoria and New South Wales that are similar in age to the  
98 Delamerian Orogen; (Gray and Foster, 2004).

99 The presence of Precambrian outcrops in Tasmania and the relative lack of similar age rocks in adjacent  
100 mainland Australia has led to different models which attempted to explain the existence of Proterozoic  
101 Tasmania. For instance, Li et al. (1997) suggested that western Tasmania may be the remnant of a continental  
102 fragment set adrift by Rodinian break-up, whereas Calvert and Walter (2000) proposed that King Island, along  
103 with western Tasmania, rifted away from the Australian craton around ~600 Ma (Fig. 1). Other researchers have  
104 developed scenarios in which the island of Tasmania was present as a separate microcontinental block that was  
105 positioned outboard of the eastern margin of Gondwana before re-attaching at the commencement of the  
106 Palaeozoic (Berry et al., 2008).

107 A popular model that attempts to reconcile the geology observed in Tasmania and adjacent mainland Australia  
108 is that of Cayley (2011[a](#)). This model proposes that central Victoria and western Tasmania formed a  
109 microcontinental block called “VanDieland” that fused with East Gondwana at the end of the Cambrian,  
110 possibly terminating the Delamerian Orogeny. VanDieland became entangled in the subduction-accretion  
111 system ~~thatwhich~~ built the Palaeozoic orogens- that now comprise eastern Australia (Fig. 1). Delineating  
112 Precambrian continental fragments within southeast Australia has proven difficult, partly due to more recent



113 sedimentary cover that obscures large tracts of the Tasmanides. However, if present, they likely have distinctive  
114 structural and seismic velocity characteristics (Glen, 2013).

### 115 3 Previous geophysical studies

116 ~~A variety of geophysical methods have so far been deployed to study the imaging techniques previously~~  
117 ~~employed to study crustal structure~~ crustal structure of beneath the Tasmanides, include: RF analysis (e.g.  
118 Shibutani et al., 1996; Clitheroe et al., 2000; Chevrot and van der Hilst, 2000; Kennett et al., 2011; Fontaine et  
119 al., 2013a,b), ambient noise tomography (e.g. Saygin and Kennett, 2010; Bodin et al., 2012b; Young et al.,  
120 2013a,b; Pilia et al., 2015a,b; Crowder et al., 2019), studies based on potential field imaging and numerical  
121 modelling (e.g. Gunn et al., 1997; Morse et al., 2009; Moresi et al., 2014; Moore et al., 2015, 2016), teleseismic  
122 tomography (Rawlinson and Urvoy, 2006; Rawlinson and Kennett, 2008; Rawlinson et al., 2015, 2016; Bello et  
123 al., 2019b) and seismic reflection and refraction profiling (e.g. Finlayson et al., 1980; Collins, 1991; Dineen et  
124 al., 2001; Glen et al., 2002; Finlayson et al., 2002; Drummond et al., 2006; Cayley et al., 2011; Glen, 2013).  
125 Shibutani et al. (1996) applied a non-linear inversion method to RF waveforms to constrain the shear wave  
126 velocity beneath broadband seismic stations in eastern Australia. They found that the Moho is relatively shallow  
127 (30-36 km depth) and sharp within the cratonic region, and deeper (38-44 km) and transitional along the axis of  
128 the Tasmanides. They suggested that crustal thickening of the fold belt by underplating or intrusion of mantle  
129 materials may have contributed to this observation. The work of Clitheroe et al. (2000) built on this earlier work  
130 by inverting used RFs to map broad-scale crustal thickness and Moho character across the Australian continent.  
131 They found that in general, there was good agreement between xenolith-derived estimates of Moho depth and  
132 those determined by RF inversion, except beneath the Lachlan Fold Belt, where a broad Moho transition may be  
133 present. Overall, however, the RF results were consistent with those determined by These findings confirmed  
134 the previous work of Drummond and Collins (1986) and Collins (1991), who used seismic reflection and  
135 refraction transects to determine that the Lachlan Fold Belt includes has the thickest crust (~50 km) in eastern  
136 Australia. Shibutani et al. (1996) applied a genetic algorithm inversion, a non-linear global optimisation  
137 technique, to determine the lithospheric velocity structure of southeast Australia from teleseismic RFs. They  
138 found that the Moho is shallow (30-36 km) and sharp within the craton and deep (38-44 km) and transitional  
139 beneath the Tasmanides. They suggested that underplating or intrusion of mantle material may have thickened  
140 the crust and produced a less distinct contrast across the Moho. A more recent study by Fontaine et al. (2013a)  
141 employed  $H-\kappa$  stacking and non-linear RF inversion to investigate crustal thickness, shear wave velocity  
142 structure, as well as dipping and anisotropy of the crustal layers. Their results also indicated a thick crust (~48  
143 km) and an intermediate (2-9 km) crust-mantle transition beneath the Lachlan Fold Belt, zone which could be  
144 attributed to underplating beneath the crust and/or high concentrations of mafic rocks in the mid-lower crust.  
145 Their results also showed a dipping Moho together with crustal anisotropy in the vicinity of three seismic  
146 stations (YNG, CNB and CAN). In our new work, we have a much increased data coverage of the study area  
147 (southern Tasmanides); this allows us to resolve new features, and further investigate the presence of structures  
148 that have been suggested by previous studies.

149 Over the last decade, ambient noise tomography has become a popular tool for studying the structure of the  
150 Australian crust. Saygin and Kennett (2010) produced the first group velocity maps of the Australian continent

151 from Rayleigh wave group velocity dispersion in the period range 5.0–12.5 seconds. Limited spatial resolution  
152 ( $\sim 2^\circ \times 2^\circ$ ) in our study region means that this model is only able to represent the structure beneath Bass Strait as  
153 a broad, low velocity anomaly. However, the group velocities exhibit a good correlation with known basins and  
154 cratons. Subsequent studies using denser arrays covering southeast mainland Australia (Arroucau et al., 2010),  
155 [southeastern Australia \(Young et al. 2013\)](#), and northern Tasmania (Young et al., 2011) show good correlations  
156 between group/phase velocity maps and sedimentary and basement terrane boundaries. In order to account for  
157 uneven data distribution, Bodin et al. (2012b) used a Bayesian transdimensional inversion scheme to generate  
158 group velocity maps that span the Australian continent from multi-scale ambient noise datasets. However, in our  
159 study area their model is of low resolution due to the limited station coverage and hence few details on crustal  
160 structure can be inferred. Bodin et al. (2012a) subsequently applied Bayesian statistics to reconstruct the Moho  
161 [geometry/depth](#) of Australia using a variety of seismic datasets, which gave an approximate Moho depth of  $\sim 30$   
162 km beneath Bass Strait. [Pilia et al. \(2015a,b\)](#) and [Crowder et al. \(2019\)](#) [derived 3-D shear wave velocity models](#)  
163 [of the Bass strait region using ambient noise data from the same array of temporary stations that we exploit in](#)  
164 [this study. They were able to constrain the lateral and depth extent of the primary sedimentary basins in the](#)  
165 [region, and provide insight into the seismic character of the Precambrian micro-continental block that appears to](#)  
166 [underpin southern Victoria, north western Tasmania and Bass Strait.](#)

167 [Teleseismic tomography has also been used to image the lithosphere beneath southeast Australia, thanks in part](#)  
168 [to the prolific deployment of short-period seismometers as part of the WOMBAT transportable array project](#)  
169 [\(Rawlinson and Kennett, 2008, Rawlinson et al., 2015, 2016\). While the main focus has been on the upper](#)  
170 [mantle, in Tasmania, where station spacing was denser, some constraints on crustal velocity structure were](#)  
171 [possible. Rawlinson et al. \(2006\) found that the crust beneath the ETT was significantly faster than the crust](#)  
172 [beneath central Tasmania, which may represent a contrast between crust with oceanic provenance in the east and](#)  
173 [Precambrian continental provenance in the west. Bello et al. \(2019b\) built on this work by including teleseismic](#)  
174 [arrival time data from the same temporary deployment as the the current study to generate a detailed upper](#)  
175 [mantle model of southeast Australia, which revealed that Bass Strait was underlain by lower velocities,](#)  
176 [consistent with thinned lithosphere as a result of failed rifting during the break-up of Australia and Antarctica.](#)

177 [Active source seismic profiling has also been widely used in southeast Australia to characterize crustal velocity](#)  
178 [structure \(e.g. Finlayson et al., 1980; Collins, 1991; Finlayson et al., 2002; Drummond et al., 2006; Glen, 2013\).](#)  
179 [This has largely focused on the transition from continental to oceanic crust at passive margins, but has also been](#)  
180 [used to image major transition zones or faults between orogens \(Glen, 2013\) or within orogens \(Cayley et al.,](#)  
181 [2011a,b\), the latter of which lead to the VanDieland microcontinental model. Rawlinson and Urvoy \(2006\)](#)  
182 [jointly inverted teleseismic arrival times and active source wide-angle traveltimes in northern Tasmania to](#)  
183 [constrain crustal velocity, Moho geometry and upper mantle velocity structure and found that both northeastern](#)  
184 [and northwestern Tasmania is characterised by thinner \( \$<28\$  km\) and higher velocity crust compared to central](#)  
185 [Tasmania.](#)

186 Potential field data have also been exploited to study the formation and structure of the Tasmanides. Gunn et al.  
187 (1997) integrated potential field data (magnetic and gravity), seismic reflection data, outcrop geology and well  
188 information to study the crustal structure of the Australian continent. Their study found that the occurrence of

189 tensional stress, oriented NE-SW along basement structures in the Bass Basin, is able to explain the formation  
 190 of the three major sedimentary basins that overlie dense mafic material, which in turn was formed by mantle  
 191 decompression processes associated with crustal stretching. From the interpretation of new aeromagnetic data,  
 192 Morse et al. (2009) delineated the architecture of the Bass Strait basins and their supporting basement structure.  
 193 Subsequent studies by Moore et al. (2015, 2016) used gravity, magnetic, seismic reflection and outcrop data to  
 194 support the hypothesis of a VanDieland microcontinent. Their study showed that VanDieland comprises seven  
 195 distinct microcontinental ribbon terranes that appear to have amalgamated by the Late Cambrian, with major  
 196 faults and suture zones bonding these ribbon terranes together.

197 While the last few decades have seen important advances and insights made into our understanding of the  
 198 southern Tasmanides, there still remains limited data on the deep crustal structure beneath Bass Strait, which is  
 199 our region of interest. It is therefore timely that we can exploit, using the RF technique, teleseismic data  
 200 recorded by a collection of temporary and permanent seismic stations in the region to study the structure of the  
 201 crust, Moho and uppermost mantle beneath mainland Australia, Bass Strait and Tasmania.

## 202 **4 Data**

203 A collaboration involving five organisations (University of Tasmania, Australian National University, Mineral  
 204 Resources Tasmania, the Geological Survey of Victoria and FROGTECH) deployed the temporary Bass seismic  
 205 array from May 2011 to April 2013. It consisted of 24 broadband, three-component seismic stations that  
 206 spanned northern Tasmania, and a selection of islands in Bass Strait and southern Victoria. The instruments  
 207 used were 23 Güralp 40T and one Güralp 3ESP sensors coupled to Earth Data PR6-24 data loggers. The  
 208 permanent stations consist of eight broadband sensors managed by IRIS, GEOSCOPE and the Australian  
 209 National Seismic Network (ANSN). The distribution of all 32 seismic stations that are used in this study is  
 210 plotted in Figure 2. Earthquakes with magnitudes  $m_b > 5.5$  at epicentral distances between  $30^\circ$  and  $90^\circ$  comprise  
 211 the seismic sources used in this analysis (Fig. 3). This resulted in an acceptable azimuthal coverage of  
 212 earthquakes between the northwest and east of the array, where active convergence of the Australian and  
 213 Eurasian plate coupled with westward motion of the Pacific plate has produced extensive subduction zones. To  
 214 the south and southwest of the array, the absence of subduction zones in the required epicentral distance range  
 215 means that there are significantly fewer events available for analysis from these regions.

## 216 **5 Methods**

### 217 **5.1 Receiver functions**

218 The RF technique (Langston, 1979) uses earthquakes at teleseismic distances to enable estimation of Moho  
 219 depth and shear wave velocity structure in the neighbourhood vicinity of a seismic recorder. If this technique  
 220 can be applied to a network of stations with good spatial coverage, it represents an effective way of mapping  
 221 lateral variations in Moho depth and crustal structure. ~~The coverage and quality of broadband data available for  
 222 this study provides a sound basis on which to examine the crustal structure of the southern Tasmanides.~~

223 A recorded teleseismic wavefield at a broadband station can be described by the convolutional model in which  
 224 operators that represent the source radiation pattern, path effects, crustal structure below the station and

instrument response are combined to describe the recorded waveform. By using deconvolution to remove the effects of the source, path and response of the instrument (e.g. Langston, 1979), information on local crustal structure beneath the station can be extracted from *P-S* wave conversions at discontinuities in seismic velocity (Owens et al., 1987; Ammon, 1991).

*P*-wave RFs were determined from teleseismic *P*-waveforms using FuncLab software (Eagar and Fouch, 2012; Porritt and Miller, 2018), following preprocessing using the seismic analysis code (SAC) (Goldstein et al., 2003). RFs were computed by applying using an iterative time-domain deconvolution scheme developed by Ligorria and Ammon (1999) with a 2.5 s Gaussian filter width. This is achieved by deconvolution of the vertical component waveform from the radial and transverse waveforms with a central frequency of ~1 Hz. This frequency was selected on account of significant source energy detected in the ~1 Hz range of teleseismic *P* arrivals, which are sensitive to crustal-scale anomalies. It also provides a favourable lateral sensitivity with respect to Fresnel zone width (~15 km at Moho depth) when the conversions from *P* to *S* are mapped as velocity and crustal thickness variations.

~~The complete set of 1765 events (Fig. 3) and 32 stations produced 21,671 preliminary RFs. These RFs were manually picked-inspected using the FuncLab trace editor; and a subset of 9,674 RFs were selected for further analysis by using the visual clarity of the direct arrivals as an acceptance-criteriaacceptance criterion, only a total of 9,674 RFs were retained for further analysis. The RFs were computed using an iterative time-domain deconvolution scheme developed by Ligorria and Ammon, (1999) with a 2.5 s Gaussian filter width. This is performed by deconvolution of the vertical component waveform from the radial and transverse waveforms with a central frequency of 1 Hz. This frequency was selected on account of significant source energy detected in the 1 Hz range of teleseismic *P* arrivals, which are sensitive to crustal-scale anomalies. It also provides a favourable lateral sensitivity with respect to Fresnel zone width (~15 km at Moho depth) when the conversions from *P* to *S* are mapped as velocity and crustal thickness variations.~~

~~Due to high noise levels of noise and fewer events associated with the temporary BASS array dataset, and the modest number of good quality RFs we wereresulted from the able to extractabove selection method, so different selection criteria were applied that assessed the *P*-arrival, Moho conversion and later amplitudes in conjunction with overall noise levels exhibited by the transverse component RFs. This enabled the temporary BASS stations to yield between 2 and 30 good quality receiver functions, and increased the number of stations where H- $\kappa$  stacking and NA inversion could be applied from 13 to 20.~~

## 5.2 *H- $\kappa$* stacking

Having obtained reliable *P*-wave RFs, the *H- $\kappa$*  stacking technique is used to estimate crustal thickness, ~~Poisson's ratio~~ and bulk *V<sub>p</sub>/V<sub>s</sub>* for individual stations. We apply the method of Zhu and Kanamori (2000) to stations where the direct *P<sub>s</sub>* (Moho *P*-to-*S* conversion) phase and its multiples are observed. This technique makes use of a grid search to determine the crustal thickness (*H*) and *V<sub>p</sub>/V<sub>s</sub>* ( $\kappa$ ) values that correspond to the peak amplitude of the stacked phases. A clear maximum requires a contribution from both the primary phase (*P<sub>s</sub>*) and the associated multiples (*PpP<sub>s</sub>* and *PpS<sub>s</sub>+P<sub>s</sub>P<sub>s</sub>*). In the absence of multiples, the maximum becomes smeared out due to the inherent trade-off between crustal thickness (*H*) and average crustal velocity properties ( $\kappa$ )—(Ammon

et al., 1990; Zhu and Kanamori, 2000). The  $H$ - $\kappa$  stacking algorithm reduces the aforementioned ambiguity by summing RF amplitudes for  $P_s$  and its multiples -  $PpPs$  and  $PpSs+PsPs$  - at arrival times corresponding to a range of  $H$  and  $Vp/Vs$  values. In the  $H$ - $\kappa$  domain the equation for stacking amplitude is

$$s(H, \kappa) = \sum_{j=1}^N w_1 r_j(t_1) + w_2 r_j(t_2) + w_3 r_j(t_3) \quad (1)$$

where  $r_j(t_i)$ ,  $i=1,2,3$  are the RF amplitude values at the expected arrival times  $t_1, t_2, t_3$  of the  $P_s$ ,  $PpPs$ ,  $PpSs+PsPs$  phases respectively for the  $j^{\text{th}}$  RF,  $w_1, w_2, w_3$  are weights based on the signal to noise ratio,  $(w_1+w_2+w_3=1)$ , and  $N$  is the total number of radial RFs for the station.  $s(H, \kappa)$  achieves its maximum value when all three phases stack constructively, thereby producing estimates for  $H$  and  $Vp/Vs$  beneath the station (see Figure 5 and Supplementary Figures XXXS1-S34). In this study, the weighting factors used are  $w_1=0.6, w_2=0.3, w_3=0.1$ . The  $H$ - $\kappa$  approach requires an estimate of the mean crustal  $P$ -wave velocity, which is used as an initial value. Based on the results of a previous seismic refraction study (Drummond and Collins, 1986), we use an average crustal velocity of  $Vp = 6.65$  km/s to obtain our estimates of  $H$  and  $\kappa$  in the study area, noting that  $H$ - $\kappa$  stacking results are much more dependent on  $Vp/Vs$  than  $Vp$  (Zhu and Kanamori, 2000). To estimate the uncertainties in the  $H$ - $\kappa$  stacking results, we compute the standard deviation of the  $H$  and  $\kappa$  values at each station. When only a small number of RFs are available at a station (e.g. 4 in the case of MILA) the estimates are unlikely to be particularly robust, and in such instances are perhaps best viewed as a lower bounds on uncertainty.

~~$H$ - $\kappa$  stacking can also be used to determine Poisson's ratio, which is a useful parameter for inferring the physical and compositional properties of the crust (Christensen, 1996) and providing insight into fractures, fluids, and partial melt (e.g. Mavko, 1980). The Poisson's ratio  $\sigma$  can be determined from  $\kappa$  using the equation~~

~~where  $\kappa = Vp/Vs$ .~~ While simple to implement, the Zhu and Kanamori (2000) method can suffer from large uncertainties due to its assumption of a simple flat-laying layer over a half-space with constant crustal and upper mantle properties. Consequently, there are only two search parameters ( $H$  and  $\kappa$ ) plus *a priori* information ( $Vp$ , weightings) and it does not account for variation with backazimuth. These problems can cause non-unique and inaccurate estimates, which can lead to potentially misleading interpretations; for instance, a low velocity upper crustal layer can appear as a very shallow Moho in an  $H$ - $\kappa$  stacking search space diagram. Also, a dipping Moho and/or anisotropic layers within the crust can contribute to uncertainty.

### 5.3 Nonlinear waveform inversion

In an effort to refine the crustal model, we invert a stack of the radial RFs by adopting the workflow described by Shibutani et al. (1996). We divide the waveform data (RFs) into four quadrants based on the backazimuth of their incoming energy. The 1<sup>st</sup> quadrant backazimuth range is from 0° and 90°, and an equivalent range in a clockwise direction defines the consecutive quadrants. The 2<sup>nd</sup> and 3<sup>rd</sup> quadrants (south-eastern and south-western backazimuths) have very small numbers of RFs. Data from the 1<sup>st</sup> and 4<sup>th</sup> quadrants are of better quality, with the 1<sup>st</sup> quadrant showing more coherency than the 4<sup>th</sup> quadrant, which is likely due to

the orientation of surrounding tectonic plate boundaries and hence the pattern of  $P$ -wave energy radiated towards Australia. Kennett and Furumura (2008) showed that seismic waves arriving in Australia from the northern azimuths undergo multiple scattering but low intrinsic attenuation due to heterogeneity in the lower crust and mantle; this tends to produce prolonged high-frequency coda. An important assumption in our inversion is that we neglect anisotropy and possible Moho dip, which we assume have a second order influence on the waveforms we use to constrain 1-D models of the crust and upper mantle.

Visual examination of coherency in  $P$  to  $S$  conversions allows us to select a subset of RF waveforms for subsequent stacking. This resulted in groups of mutually coherent waveforms after which a moveout correction is then applied to remove the kinematic effect of different earthquake distances prior to stacking using a cross-correlation matrix approach described in Chen et al. (2010) and Tkalčić et al. (2011). Our ~~strict criteria give~~ [reliable visual acceptance criteria yields](#) RFs at only ~~16~~ 4 out of the 32 stations used for this study. An example of some stacked RFs is given in Fig. ~~ure~~ 4.

### 5.3.1 Neighborhood algorithm

We invert RFs for 1-D seismic velocity structure beneath selected seismic stations using the Neighbourhood Algorithm or NA (Sambridge, 1999a,b) in order to better understand the internal structure of the crust and the nature of the transition to the upper mantle. NA makes use of Voronoi cells to help construct a searchable parameter space, with the aim of preferentially sampling regions of low data misfit. In the inversion process, a Thomson-Haskell matrix method (Thomson, 1950 and Haskell, 1953) was used to calculate a synthetic radial RF for a given 1-D (layered) structure. During the inversion, as in Shibutani et al. (1996) and Clitheroe et al. (2000), each model is described by six layers: a layer of sediment, a basement layer, an upper crust, middle crust and lower crust, and an underlying mantle layer, all of which feature velocity gradients and potentially, velocity jumps across boundaries. The inversion involves constraining 24 parameters:  $V_s$  values at the top and bottom of each layer, layer thickness and the  $V_p/V_s$  ratio in each layer (Table 1). The inclusion of  $V_p/V_s$  ratio as an unknown primarily aims to accommodate the effects of a sediment layer with limited prior constraints (Bannister et al., 2003). There are two important controlling parameters required by NA: (1) the number of models produced per iteration ( $n_s$ ); and (2) the number of neighbourhoods re-sampled per iteration ( $n_r$ ). After a number of trials we chose the maximum number of iterations to be 5500, with  $n_s=13$  and  $n_r=13$  for all iterations. We employ a chi-squared  $\chi^2$  metric (see Sambridge 1999a for more details) to compute the misfit

function, which is a measure of the inconsistency between the true  $\phi_i^{obs}$ , and predicted,  $\phi_i^{pre}(m)$ , waveforms for a given model  $m$ :

$$\chi_v^2(m) = \frac{1}{v} \sum_{i=1}^{N_d} \left( \frac{\phi_i^{obs} - \phi_i^{pre}(m)}{\sigma_i} \right)^2 \quad (2)$$

where  $\sigma_i$  represents the noise standard deviation determined from  $\phi_i^{obs}$ , following the method described in



Gouveia and Scales (1998), and  $\nu$  represents the number of degrees of freedom (the difference between the number of observations and the number of parameters being inverted for). Using the above stated parameters, the inversion targets the 1-D structure that produces the best fit between the predicted and observed RF. Figures 7-9 and 8 and Supplementary Figures S5-S8 present example results of inversions via density plots of the best 1000 data-fitting  $S$ -wave velocity models produced by the NA. The optimum data fitting model is plotted in red.

## 6 Results

### 6.1 $H$ - $\kappa$ stacking results for Moho depth and $V_p/V_s$ (including Poisson's ratio)

Maps which plot depicting of crustal thicknesses and average  $V_p/V_s$  from  $H$ - $\kappa$  stacking in southeast Australia from 16 stations are plotted from the results obtained at 14 stations (shown in Figure 6 and 9). At the remaining stations, we could not detect any clear multiples or Moho conversions in the RFs from any direction. A previous study by Chevrot and van der Hilst (2000) has noted that this region is devoid of clear multiples. The crustal thickness for all analysed stations in the study area varies from  $23.0 \pm 5.2$  km (BA02) beneath King island in Bass Strait to  $39.1 \pm 0.5$  km (CAN) beneath the Lachlan Fold Belt, and the variation strongly correlates with topography. The associated  $V_p/V_s$  values range from  $1.65 \pm 0.07$  (BA11) beneath King island to  $1.76 \pm 0.04$  (YNG) beneath the Lachlan Fold Belt. Crust of the order of 30-34 km thickness occurs beneath much of Van Dieland and beneath Van Dieland (Fig. 6a) is thin in the north ( $\sim 37.5$  km) and south ( $\sim 33$  km), but appears to be considerably thinner beneath the Victorian and Tasmanian margin of Bass Strait ( $\sim 25$  km). The mountainous region of the Lachlan Fold Belt has the deepest Moho at  $39.1 \pm 0.5$  km (CAN) and a corresponding  $V_p/V_s$  value of  $1.73 \pm 0.02$ . Crust that is consistently between  $\sim 31$  and  $\sim 33$  km thick lies beneath the East Tasmania Terrane and Eastern Bass Strait (ETT+EB).  $V_p/V_s$  ratio varies between  $\sim 1.65$  beneath station BA11, which also exhibits the thinnest crust, and  $\sim 1.93$  beneath stations BA19 and BA20 in southern Victoria. There is no obvious correlation between the number of RFs used in the  $H$ - $\kappa$  stacking and the size of the uncertainty in either Moho depth or  $V_p/V_s$ , but as mentioned previously, the uncertainty estimates for stations with a low number of RFs are likely to be less robust. Table 2 shows a summary of  $H$ - $\kappa$  stacking results parameters for the analysed stations that have been analysed.

At  $\sim 40$  km, the crustal thickness beneath the Lachlan Fold Belt is significant, but decreases southward towards Van Dieland ( $\sim 32.5$  km) and southeastward towards the East Tasmania Terrane and Eastern Bass Strait (ETT+EB) ( $\sim 33$  km). Overall, the Moho becomes shallower from the southern tip of Van Dieland (TAU) towards and into Bass Strait to the north, before becoming deeper once more under the mainland part of the Van Dieland microcontinental block (Fig. 6a). The crustal thickness is more or less uniform beneath the Lachlan Fold Belt, East Tasmania Terrane and eastern Bass Strait.

The majority of our study region has a low-to-intermediate Poisson's ratio. Poisson's ratio is highest ( $0.262 \pm 0.014$ ) in the Lachlan Fold Belt (see Table 2). In Van Dieland, the Poisson's ratios generally decrease northward into Bass Strait from  $0.240 \pm 0.019$  (MOO) to  $0.210 \pm 0.013$  (BA11) and then increase into mainland Australia to  $0.226 \pm 0.017$  (TOO). The relatively average to high values in the Lachlan Fold Belt ( $0.235 \pm 0.017$ – $0.262 \pm 0.014$ ) are in agreement with the presence of a mafic lower crust, as suggested by a number of other studies

(Drummond and Collins, 1986; Shibutani et al., 1996; Clitheroe et al., 2000; Finlayson et al., 2002). The ratios in the ETT+EB ( $0.220 \pm 0.008$  (BA08) —  $0.242 \pm 0.005$  (BA17)) agree with constraints from seismic reflection and refraction studies and may indicate a felsic to intermediate (average) crustal composition (Finlayson et al., 2002; Collins et al., 2003).

## 6.2 Nonlinear inversion results

Results of the NA inversion were successfully obtained for a selection of permanent and temporary stations, as shown in Table 2 and Figure 10. If the Moho is defined by a gentle velocity gradient, the base of the velocity gradient is used as a proxy for the Moho depth, as done in previous RF (e.g. Clitheroe et al., 2000; Fontaine et al., 2013a) and seismic refraction (Collins, 1991; Collins et al., 2003) studies. We also adopt an upper mantle velocity of  $V_p = 7.6$  km/s (i.e.  $V_s = 4.3$ - $4.4$  km/s for  $V_p/V_s$  ratios of 1.73-1.77 at the base of the Moho gradient) following Clitheroe et al. (2000) who used this value for RF studies, and Collins et al. (2003) who used  $V_p > 7.8$  km/s for their summary of both seismic refraction and RF results; these  $V_p$  values are consistent with global Earth models (e.g. Kennett et al., 1995). Therefore, we also require the  $S$ -wave velocity to be  $> 4.4$  km/s beneath the Moho. We present the  $S$ -wave velocity profiles from the NA inversion for stations CAN, MOO, TOO and YNG, BA13 and BA17 in Figures 7 and 89, together with observed and predicted RFs. The  $S$ -wave velocity inversion results of the remaining two stations are included as supplementary material (see Supplementary Figures S45-S8). In assigning the Moho depth, we consider three criteria to examine the quality of the inversion result: (1) misfit value  $\chi^2$ ; (2) the quality of the RF stack (which is based on our ability to pick the direct and multiple phases); and (3) the visual fit between the synthetic and observed RF. Models that fail to fit significant arrivals in the observed RF are rejected. Based on these criteria, the inversion results are classified as:

- Very good: very low  $\chi^2$  (typically  $< 0.4$ ), very good visual fit to direct and multiple phases.
- Good: low  $\chi^2$  (typically 0.4-0.8), direct phases clearly visible, multiple phases less clear, and a good visual fit to all major identifiable phases.
- Poor: medium to high  $\chi^2$  (in the range 0.8-1.2), direct phases visible, multiple phases unclear, and moderate visual fit to some identifiable phases. Looking at the character of the crust-mantle transition, this study classifies the transition zone as sharp  $\leq 2$  km, intermediate 2-10 km or broad  $\geq 10$  km as initially proposed by Shibutani et al. (1996) and modified by Clitheroe et al. (2000).

In general, the optimum  $\chi^2$  value is normally considered to be 1, since below this value, the tendency is to fit noise rather than signal. However, this is for the ideal case when the number of degrees of freedom and the absolute values of the data uncertainty are well known (e.g. in the case of a synthetic test). In the case of observational data, these values are often poorly constrained, so using the relative  $\chi^2$  values coupled with visual assessment of the data fit appears to be reasonable.

We also note that for the seven permanent stations for which we produce receiver function inversion/H-K

stacking results, five have estimates of Moho depth from previous receiver function studies. Clitheroe et al., (2000) estimated Moho depth at 49 km beneath CAN based on a non-linear inversion, which is ~10 km greater than the results we obtain for both NA inversion and H- $\kappa$  stacking (see section 7.1 for further discussion of this discrepancy). Ford et al. (2010) determine Moho depth beneath stations MOO, TOO, TAU and YNG using H- $\kappa$  K-stacking, and find values (compared to our H- $\kappa$  K-stacking results) of  $33 \pm 3$  km ( $33.0 \pm 1.2$  km),  $34 \pm 3$  km ( $37.5 \pm 1.2$  km),  $32 \pm 3$  km ( $33.5 \pm 1.9$  km) and  $33 \pm 2$  km ( $37.3 \pm 1.2 \pm 0.5$  km) respectively. These are all within error, with the slight exception of station YNG, located in Young, on the western flanks of the Great Dividing Range, where we might expect the crust to be slightly thicker than average. Overall, however, these similarities suggest that our results are likely to be robust.

## 7 Discussion

For convenience, the seismic stations were separated into three groups (Fig. 2 and Table 2) based on tectonic settings and the results obtained. Stations YNG, CAN, CNB, MILA and BA13 are located in the Lachlan Fold Belt; stations BA02, BA11, BA19, BA20, TAU, MOO and TOO sit above the VanDieland microcontinental block; and stations BA07, BA08, BA09 and BA17 lie in the East Tasmania Terrane and Eastern Bass Strait (ETT+EB). Stations BA22 and BA24 lie to the west of VanDieland. This discussion focuses on crustal thickness, and the nature of the Moho and crustal velocity and velocity ratio variations from H- $\kappa$  stacking and the nature of the crust from  $V_p/V_s$ , Poisson's ratio and the 1-D S-wave velocity models. Overall, the agreement between Moho depths obtained from the H- $\kappa$  stacking results and NA-inversion is generally within error (Table 2), which makes a joint interpretation more straight forward. Comparison is also made to other studies that have examined crustal seismic properties in southeast Australia, and we attempt to integrate our new findings with previous results from teleseismic tomography, SKS splitting and ambient noise tomography in order to better understand the crust and upper mantle structure and dynamics beneath this region.

### 7.1 Lateral variation of crustal thickness and nature of the Moho

The RF analysis clearly reveals the presence of lateral changes in crustal thickness that span mainland Australia through Bass Strait to Tasmania (Figures 6 and 10; in the latter case, RF depths from previous studies are also included for reference). The stations located in the Palaeozoic Lachlan Fold Belt reveals a generally thick crust that ranges from  $36.5 \pm 4.4$  to  $39.1 \pm 0.5$  km between ~37 and ~40 km. At station CAN, there is a disparity in crustal thickness obtained by the non-linear inversion method (~49 km) and H- $\kappa$  stacking technique ( $39.1 \pm 0.5$  km). The reason appears to be that the H- $\kappa$  stacking analysis assumes that the crust is a single layer with a velocity jump across the Moho, whereas the crust-mantle transition is actually gradual; hence it instead targets a shallower boundary that is not the Moho. Therefore, the deep crustal structure obtained at YNG, CAN and CNB is part of a broad velocity transition zone from crust to mantle. The crustal thickness and Moho transition zone beneath the Lachlan Orogen obtained by the nonlinear inversion method is consistent with previous refraction and RF studies. Although the Moho was picked as a velocity jump for stations YNG, CAN and CNB, the velocity nonetheless tends to continue to increase with depth below the discontinuity. This, coupled with the fact that Clitheroe et al. (2000) estimate the Moho to be almost 10 km deeper beneath CAN, is consistent with the presence of mafic underplating (Shibutani et al., 1996; Clitheroe et al., 2000; Collins et al., 2003; Fontaine et al., 2013a,b). The crustal thickness variations and lack of a clear Moho at the base of the Lachlan Orogen crust may

437 ~~be a consequence of mafic magmatic underplating~~ (e.g. Drummond and Collins, 1986; Shibutani et al., 1996;  
 438 Clitheroe et al., 2000), ~~– sourced from the ambient convecting mantle. The top and bottom of such a layer could~~  
 439 ~~feature a velocity jumpstep with depth; hence resulting in uncertainty in the true Moho depth and its internal~~  
 440 ~~structure is likely to be layered and/or gradational, hence resulting in uncertainty in the true Moho depth. This~~  
 441 ~~reinforces the opinion of~~ Based on deep crustal reflection profiling, Glen et al. (2002), ~~who~~ suggested that the  
 442 deep Moho underlying the Lachlan Orogen results from magmatic underplating that added a thick Ordovician  
 443 mafic layer at the base of the crust coupled with a thick sequence of Ordovician mafic rocks that can be found in  
 444 the mid and lower crust. Finlayson et al. (2002) and Glen et al. (2002) also inferred ~~—~~ the presence of  
 445 underplating near CNB and CAN from seismic refraction data. Collins (2002) postulated that the underplating  
 446 might have occurred in the back-arc region of a subduction zone due to pronounced adiabatic decompression  
 447 melting in the asthenosphere. The seismic tomography model of Rawlinson et al. (2010, 2011) exhibits an  
 448 increase in *P*-wavespeed at 50 km depth beneath CAN, CNB and YNG and the authors suggest that magmatic  
 449 underplating may be the cause of the high velocity anomaly. A recent study by Davies et al. (2015) identified  
 450 the longest continental hotspot track in the world (over 2000 km total length), which began in north Queensland  
 451 at ~33 Ma, and propagated southward underneath the ~~present-day~~ present-day Lachlan Fold Belt and Bass Strait.  
 452 The magmatic underplating could therefore be a consequence of the passage of the continent above a mantle  
 453 upwelling leading to a more diffuse crust-mantle transition zone. The thickened crust and a transitional Moho  
 454 observed in the Lachlan Fold Belt are consistent with the proposed delamination models of Collins and Vernon  
 455 (1994).

456 Strong lateral changes in crustal ~~seismic~~ structure (Figures 6 and 10) ~~and/or composition~~ beneath VanDieland  
 457 appear to be a reflection of the region's complex tectonic history (Fig. 6 and 9). The thick crust ( $\sim 37.5 \pm 1.2$  km)  
 458 beneath the Selwyn Block (see Figure 1 for its location) – within the northern margin of VanDieland in southern  
 459 Victoria – thins ~~dramatically to ~26 km (to  $30.5 \pm 2.1$  km)~~ as it enters Bass Strait, ~~increases to ~30 km beneath~~  
 460 ~~King Island (BA11), then thins to ~23 km beneath NW Tasmania, before increasing to ~33 km in southern~~  
 461 ~~Tasmania. yet in southern Tasmania, at stations TAU and MOO, the crust is thicker ( $33.5 \pm 1.9$  km). This is~~  
 462 ~~reflected in both the NA inversion and *H- $\kappa$*  stacking depth estimates where a sharp Moho is observed beneath~~  
 463 ~~this region of the study area (Fig. 6 and 9). The Moho depth estimates from RFs at stations TAU and MOO~~  
 464 ~~(~34 km) is almost identical (~35 km) to that deduced~~ The results in southern Tasmania agree with those of by  
 465 Korsch et al. (2002) from a seismic reflection profile adjacent to the ~~two~~ seismic stations TAU and MOO. ~~In~~  
 466 ~~contrast, the Bass Strait portion of VanDieland appears to have a relatively thinner crust (~30 km). This~~ The  
 467 ~~thinner crust beneath Bass Strait and its margins may indicate thinning of the lithosphere associated with~~  
 468 ~~lithospheric stretching~~ be a consequence of lithospheric thinning and/or delamination ~~that resulted from tectonic~~  
 469 ~~events that occur post-formation of the Tasmanides associated with failed rifting that accompanied the break-up~~  
 470 ~~of Australia and Antarctica~~ (Gaina et al., 1998).

471 Stations BA07, BA08, BA09 and BA17 (ETT+EB) collectively indicate crust of ~~relative~~ uniform thickness  
 472 ( $\sim 31$ – $32$  km, Figures 10a,b). Relative to western Bass Strait, the crust ~~is slightly thicker~~ thickens slightly in  
 473 this part of the study area, which may suggest underplating associated with a Palaeozoic subduction system (e.g.  
 474 Drummond and Collins, 1986; Gray and Foster, 2004). ~~Furthermore, our results support the crustal thickness~~  
 475 ~~estimates of Tasmania from refraction and wide-angle reflection travel time tomography by Rawlinson et al.~~

476 (2001). They suggested that the thickening of the crust beneath central northern Tasmania is associated with the  
477 suturing of the West and East Tasmania Terranes during the Middle Devonian Tabberabberan Orogeny. The  
478 Moho depths we obtained at stations TAU, MOO, BA02 and BA11 which are located within their study area  
479 show significant overlap in crustal thickness estimates (Fig. S10 in supplementary material).

480 In general, our understanding of crustal thicknesses variations are limited by station separation, so it is difficult  
481 to determine whether smooth variations in thickness or step-like transitions explain the observations.

## 482 7.2 Poisson's ratio, $V_p/V_s$ and bulk average crustal composition

483 Poisson's ratio, which shares an inverse squared relationship to  $V_p/V_s$  (Eq. 2) can constrain chemical  
484 composition and mineralogy more robustly than  $P$ - or  $S$ -wave velocity in isolation (Christensen and Fountain,  
485 1975). We observe variations in Poisson's ratio (and hence  $V_p/V_s$ ) across the study region, which we can  
486 largely equate with variations in composition or melt. Studies in mineral physics and field observations show (1)  
487 a linear increase in Poisson's ratio with decreasing  $\text{SiO}_2$  content in the continental crust (Christensen, 1996) and  
488 (2) partial melt is revealed by an elevated Poisson's ratio ( $>0.30$ ) elevated  $V_p/V_s$ , especially if the  
489 anomaly is localised to an intra-crustal layer (Owens and Zandt, 1997). In terms of  $V_p/V_s$ , a more felsic ( $\text{SiO}_2$ )  
490 composition in the lower crust is represented by a lower  $V_p/V_s$ , which reflects removal of an intermediate-mafic  
491 zone by delamination, whereas a more mafic lower crust is revealed by higher  $V_p/V_s$  ( $> 1.75$ ) which  
492 may be due to underplated material (Pan and Niu, 2011). However, lower crustal delamination can also result in  
493 decompression melting, which can yield elevated  $V_p/V_s$  (He et al., 2015). We interpret the variation of  
494 observed Poisson's ratios (0.240–0.256)  $V_p/V_s$  in the southern Tasmanides to be a consequence of  
495 compositionally heterogeneous crust and localised partial melt that may likely be sourced from recent intraplate  
496 volcanism (Rawlinson et al., 2017).

497 Figure 6b shows the distribution of bulk  $V_p/V_s$  across the study area. The pattern of  $V_p/V_s$  ratios appears to  
498 delineate three distinct zones of crust. Beneath the Lachlan Orogen, values are  $\sim 1.75$ , which is consistent with  
499 the presence of a mafic lower crust, as suggested by a number of other studies (Drummond and Collins, 1986;  
500 Shibutani et al., 1996; Clitheroe et al., 2000; Finlayson et al., 2002). Beneath eastern Bass Strait, the  $V_p/V_s$   
501 ratios are slightly lower, with BA07, BA08 and BA09 exhibiting values of 1.70, 1.70 and 1.71 respectively.  
502 These values are in agreement with constraints from seismic reflection and refraction studies (Finlayson et al.,  
503 2002; Collins et al., 2003) and may indicate a felsic to intermediate crustal composition. The geology of  
504 Flinders Island, which hosts both BA07 and BA08, is dominated by Devonian granites, which is consistent with  
505 this observation. Beneath VanDieland,  $V_p/V_s$  is highly variable, with the greatest contrast between BA11  
506 ( $\sim 1.65$ ) and BA19/20 ( $\sim 1.93$ ), and BA19/20 and TOO (1.68). BA11 is located on King Island, which is  
507 characterised by Precambrian and Devonian granite outcrops, which may help explain the low  $V_p/V_s$ . The high  
508  $V_p/V_s$  beneath BA19/20 is harder to explain, but could be caused by melt in the crust associated with the Newer  
509 Volcanics Province, which sits along the Cosgrove intraplate volcanic track, and last erupted only  $\sim 4.6$  Ka  
510 (Rawlinson et al., 2017). The return to lower  $V_p/V_s$  beneath TOO over a relatively short distance ( $\sim 100$  km) is  
511 also difficult to explain, but we note that this region of Victoria is underlain by granite intrusions.

512 In summary, the crust beneath VanDieland exhibits the greatest lateral heterogeneity in  $V_p/V_s$ , which likely



reflects considerable variations in composition and the presence of melt. This can partially be explained by the tectonic history of the region, which includes failed rifting in Bass Strait accompanied by widespread magma intrusion and granite emplacement, and more recently, the passage of a plume (Rawlinson et al., 2017). Furthermore, Moore et al. (2015) used reflection transects and potential field data to infer that Vandieland is comprised of up to seven continental ribbon terranes that are bounded by major faults and suture zones, which were likely amalgamated by the end of the Proterozoic. Hence, considerable variations in composition and hence  $V_p/V_s$  ratio are to be expected.

520

Upon comparison with our Moho-depth results (Fig. 6a and 9a,b), we find that areas of thick crust (Lachlan Fold Belt) do overlap with areas of higher  $V_p/V_s$  ( $1.70 \pm 0.04$  –  $1.76 \pm 0.04$ ). This may strengthen the argument for mafic magmatic underplating sourced from an ambient convecting mantle (Glen et al., 2002). At MILA, BA13, CAN and CNB, the  $V_p/V_s$  values ( $1.70 \pm 0.04$ – $1.73 \pm 0.06$ ) are consistent with mafic granulite (Christensen and Fountain, 1975) which has been suggested to occur in the lower crust based on a wide-angle seismic line that cross-cuts the southern region of the Lachlan Orogen (Finlayson et al., 2002). At station YNG the  $V_p/V_s$  value of  $1.76 \pm 0.04$  is consistent with biotite gneisses deduced from seismic reflection experiments carried out across the Junee-Narromine Volcanic Belt in the neighborhood of YNG (Direen et al., 2001).

The VanDieland  $V_p/V_s$  distribution is rather complex, hence we further divide this block into two separate groups: (1) West Tasmania Terrane (WTT); (2) and the Selwyn block. In the WTT, stations BA02, TAU, MOO (see Fig. 2 for the location) have a moderate  $V_p/V_s$  ( $1.69 \pm 0.02$ – $1.71 \pm 0.04$ ). The bulk  $V_p/V_s$  beneath BA02 ( $1.69 \pm 0.02$ ) supports a dominantly felsic crustal composition, which means that it is unlikely that the WTT has a mafic lower crust. A felsic crustal composition is at odds with the crustal composition required by the lower crustal flow model of Drummond and Collins (1986); Gray and Foster (2004). Our  $V_p/V_s$  measurement from the permanent GSN station TAU ( $1.70 \pm 0.08$ ), agrees well with  $V_p/V_s$  value at BA02 which implies a similar crustal composition. Station MOO adjacent to TAU exhibits a similar  $V_p/V_s$  value ( $1.71 \pm 0.04$ ) and together this may indicate that the crust is more or less homogeneous in this region. However, the slight variation in  $V_p/V_s$  values between station MOO and TAU may be associated with a slight change in bulk composition and the effects of heating following juxtaposition of western and eastern Tasmania during the Middle Devonian Tabberabberan Orogeny.

In Bass Strait and south central Victoria (underlain in part by the Selwyn Block), the abrupt variations in  $V_p/V_s$  values across stations BA11 and TOO help to underscore the region's complex tectonic evolution. Very few reliable  $H-\kappa$  stacking parameters were observed in this region: one on King Island (BA11) and the other adjacent to the NVP in south central Victoria. This is attributed to low signal quality/difficulty in identifying crustal multiples in this region (Chevrot and van der Hilst, 2000). The presence of a complex and compositionally variable Selwyn Block beneath the stations (Cayley et al., 2002), and melt-induced heating of the crust associated with the Quaternary NVP, may also be contributing factors. The  $V_p/V_s$  value at BA11 ( $1.65 \pm 0.07$ ) is the lowest in the study area which may imply a lower crustal delamination in Bass Strait, leaving a dominantly felsic crust (e.g. He et al., 2015; Bello et al., 2019b).



Station TOO located adjacent to the NVP exhibits a relatively low  $V_p/V_s$  ( $1.68 \pm 0.04$ ) that implies a more felsic composition, although mantle upwelling generated by the combined effects of a plume, SDU (shear driven upwelling) and EDC (edge driven convection) (Rawlinson et al., 2017) would likely yield melts of a mafic composition, so the low  $V_p/V_s$  may be caused by something else.

Despite the fact that crustal composition was possibly altered by recent deformational events that resulted from the break-up between Antarctica and Australia, similar  $V_p/V_s$  measurements are generally observed from the southern tip of Victoria through King Island to northwestern Tasmania. This suggests a tectonic relationship between northwest Tasmania and the Selwyn block and appears to support the presence of a coherent Precambrian microcontinental block (VanDieland) postulated by several studies in the preceding ~20 years (Cayley et al., 2002; Cayley, 2011; Moresi et al., 2014; Pilia et al., 2015a).

### 7.3 Moho depth comparison

Prior to this study, a variety of seismic methods have been used to constrain Moho depth in southeast Asia, including receiver functions, reflection profiling and wide-angle reflection and refraction experiments. In an effort to combine the results from all of these studies into a single synthesis, Kennett et al., (2011) developed the AusMoho model. This included Moho depth estimates from over 11,000 km of reflection transects across the continent, numerous refraction studies, and 150 portable and temporary stations. Due to irregular sampling, the detail of this model is highly variable; for example, the region beneath Bass Strait is constrained by only five measurements, whereas the central Lachlan Fold Belt around Canberra (see Figure 1 for location) features relatively dense sampling at ~50 km intervals or less.

AusMoho includes previous receiver function results from Shiburani et al. (1996), Clitheroe et al. (2000), Fontaine et al. (2013a) and Tkalcic et al. (2012), as well as reflection and refraction transects in Tasmania, parts of the Lachlan Orogen, and western Victoria. Figure 11 illustrates AusMoho for our study region, which exhibits large variations in Moho depth (from ~10 km to >50 km). These extremes are due to the presence of oceanic crust outboard of the passive margin of the Australian continent, and the root beneath the Southern Highlands, which represent the southern extension of the Great Dividing Range in New South Wales. Superimposed on Figure 11 are Moho depths from the four previous receiver function studies cited above, plus NA inversion and H- $\kappa$  depth estimates from this study. As expected, the correlation between the previous RF results and AusMoho is generally good, since they were part of the dataset used to build this model. In places where they don't match, this can be attributed to the presence of seismic refraction or reflection lines which were also used to constrain AusMoho.

In general, the agreement between the results from this study and AusMoho is good, but there are exceptions. For instance, CAN, CNB, YNG and MILA tend to be somewhat shallower than AusMoho. However, this can be attributed to the likely presence of mafic underplating alluded to earlier, which can effectively yield two options for the Moho transition due to an expected high ( $>1.85$ )  $V_p/V_s$  in the underplate layer (e.g. Cornwell et al., 2010). AusMoho Moho depths beneath BA07 and BA08 are considerably shallower than our estimates, which we attribute to a lack of data coverage in this region. Sizeable discrepancies also exist beneath BA02, BA19 and BA20; in the former case, the uncertainty in our H- $\kappa$  stacking estimate is 5 km, which

587 [may be a factor here. In the latter case, we also note that there is sparse data coverage southeast of Melbourne to](#)  
588 [constrain AusMoho, so it would appear that our new Moho depths are more likely to be correct. Overall, while](#)  
589 [there is good consistency between AusMoho and our new results, any updated version of AusMoho should](#)  
590 [incorporate the Moho depth estimates from this study.](#)

591 [Although AusMoho did make use of results from a 3-D wide-angle reflection and refraction survey of Tasmania](#)  
592 [\(offshore shots and on-shore stations\), it only used a few sample points for the final Moho model \(Kennett et al.,](#)  
593 [2011\), and therefore the resolution of AusMoho is considerably less than the Moho model produced by](#)  
594 [Rawlinson et al. \(2001\). Consequently, we plot our three RF results on top of this model in Supplementary](#)  
595 [Figure S9. The agreement between the Moho model and RF depths beneath MOO and TAU is good, but RF](#)  
596 [estimates beneath BA02 are shallower than the Moho model by about 4 km. However, this is within the margin](#)  
597 [of error for the H-k stacking result.](#)

#### 598 **[7.4 Synthesis](#)**

599 [In this final section, we present a synthesis of results for southeast Australia that are based on: \(1\) our new](#)  
600 [receiver function results; \(2\) teleseismic SKS splitting results from Bello et al. \(2019a\); \(3\) teleseismic](#)  
601 [tomography undertaken by Bello et al. \(2019b\); \(4\) ambient noise crustal imaging results from Young et al.](#)  
602 [\(2013\); and \(5\) AusMoho \(Kennett et al., 2011\). This synthesis is encapsulated in the plot shown in Figure 12,](#)  
603 [which is a representative transect through the Lachlan Orogen south through Bass Strait and into Tasmania.](#)  
604 [Moho depths are taken from AusMoho, and refined where additional information is available from our new RF](#)  
605 [results; crustal PWP-wave velocity is taken from the ambient noise results \(following conversion from S-wave](#)  
606 [velocity – see Bello et al, 2019b for more details\); and mantle P-wave velocities are taken from Bello et al.](#)  
607 [\(2019b\). Arrows are based on interpreted mantle flow patterns undertaken as part of the shear wave splitting](#)  
608 [study. This previous study used approximately the same temporary and broadband station network that was used](#)  
609 [in the current study, and found that beneath the Lachlan Orogen, fast axis orientations of anisotropy were](#)  
610 [aligned with contemporary plate motion \(NNE\), but beneath Bass Strait, a radial pattern was observed that is](#)  
611 [consistent with an upwelling mantle that impinges on the lithosphere and spreads out in all directions.](#)  
612 [Interestingly, the location of this phenomenon corresponds approximately to the predicted location of the](#)  
613 [Cosgrove hotspot track source \(Davies et al., 2015\), and may be caused by an upwelling mantle plume. Thus,](#)  
614 [the low velocities in the upper mantle beneath Bass Strait may be due to elevated temperatures and melt,](#)  
615 [although it is not straightforward to explain the higher velocities below 200 km depth in this context.](#)

616 [The thicker Moho boundary beneath the Lachlan Orogen \(Figure 12\) reflects the likely presence of](#)  
617 [underplating, which makes the base of the crust harder to discern seismically. However, the crust is clearly](#)  
618 [thicker here than beneath Bass Strait or Tasmania. Moho depth beneath the northern part of the Figure 12 is not](#)  
619 [constrained by our RF results, but according to AusMoho, it is relatively flat, which is consistent with](#)  
620 [Precambrian crust, and there is a faster mantle lithosphere. The strong variations in crustal velocity beneath Bass](#)  
621 [Strait can be attributed to failed rifting resulting in the formation of thick \(>10 km\) sedimentary basins and](#)  
622 [elevated temperatures \(lower velocities\), and intrusion of mafic rich material into the lower and mid crust](#)  
623 [\(higher velocities\).](#)

## 624 8 Conclusions

625 We used  $H\text{-}\kappa$  stacking of teleseismic RFs to determine crustal thickness and  $V_p/V_s$  ratios; ~~we also ratio and~~  
626 generate 1-D  $S$ -wave velocity profiles of the crust from ~~1-D~~ RF inversion in order to investigate the internal  
627 crustal velocity structure beneath the southern Tasmanides in southeast Australia. ~~We were able to verify the~~  
628 ~~presence of several crustal structures imaged by previous studies (Clitheroe et al., 2000; Finlayson et al., 2002;~~  
629 ~~Glen et al., 2002; Reading et al., 2011; Fontaine et al., 2013a,b) where there is overlap and we have also been~~  
630 ~~able to provide new estimates of crustal thickness and composition. We have also been able to shed fresh light~~  
631 ~~on the different tectonic blocks that constitute southeast Australia. The major conclusions are as follows: Our~~  
632 main findings are summarised below.

- 633 • The thick crust and broad crust-mantle transition beneath the Lachlan Fold Belt may be caused by  
634 magmatic underplating of mafic materials beneath the crust, which is consistent with a ~~relatively high~~  
635 Poisson's ratio ( $0.262 \pm 0.014$ ) ~~n~~ elevated  $V_p/V_s$  ratio (relative to ak135) of  $\sim 1.73$ . Thicker crust is also  
636 to be expected from the elevated topography beneath of the eastern Lachlan Fold Belt.
- 637 • The crustal structure is complex ~~beneath~~ in VanDieland. It thins considerably from the northern tip of  
638 the microcontinent ( $\sim 37$  km) into Bass Strait ( $\sim 26$  km) and northern Tasmania ( $\sim 23$  km), yet in  
639 southern Tasmania the crust is somewhat thicker ( $\sim 33.5 \pm 1.9$  km) compared to Bass Strait. This  
640 may in part be due to the complex origins of the microcontinent, which appears to be comprised of  
641 multiple Precambrian continental ribbons, but is also likely due to failed rifting in Bass Strait before  
642 and during the separation of Australia and Antarctica. This resulted in lithospheric  
643 stretching/delamination, magmatic intrusion, and the deposition of thick sedimentary sequences.  
644 Recent intraplate volcanism and the possible progression of a mantle plume beneath Vandieland in the  
645 last few thousand years may also have produced compositional heterogeneity and melt in the crust.  
646 Such events are likely to contribute significantly to variations in crustal thickness and the pronounced  
647 changes in  $V_p/V_s$  that we observe. ~~This scenario may be attributed to the break-up of Antaretica and~~  
648 ~~Australia and the opening of the Tasman Sea which formed three failed rift basins that contain thick~~  
649 ~~piles of sedimentary rocks (Gaina et al., 1998). The thinner crust beneath Bass Strait may indicate that~~  
650 ~~the thinning of the lithosphere is associated with processes such as delamination and/or stretching of~~  
651 ~~the lithosphere during the break-up of the two continents.~~
- 652 • Stations within the ~~at~~ ETT+EB collectively indicate crust of uniform thickness ( $\sim 31\text{--}32$  km) and  
653 uniform  $V_p/V_s$  ( $\sim 1.70$ ) ~~and an intermediate Moho transition which possibly reflects underplating~~  
654 ~~associated with a Palaeozoic subduction system, which clearly distinguishes it from Vandieland. This~~  
655 region of the crust likely represents a southern continuation of the Lachlan Orogen, and therefore is  
656 underpinned by crust of oceanic origin.
- 657 • ~~It is clear that the nature of velocity anomalies differ between stations on mainland Australia and~~  
658 ~~Tasmania. This highlights contrasting lithospheric structure across Bass Strait ( $\sim 40^\circ$  S) with thin~~  
659 ~~lithosphere to the south and thick lithosphere to the north. This sharp transition of lithospheric~~

thickness is in agreement with previous results (Clitheroe et al., 2000) and corresponds to changes in fast *S*-wave polarization directions from primarily northeast-southwest orientations in the north to nearly northwest-southeast directions in the south (Heintz and Kennett, 2005; Pilia et al., 2016; Bello et al., 2019a). Comparison of our new Moho depth results with the AusMoho model reveals an overall consistency, although at some of our station locations where AusMoho has few constraints, there are noticeable differences, such as southern Victoria and beneath Flinders Island. The discrepancies beneath the Lachlan Orogen are attributed to the presence of underplated mafic material, which can obfuscate the location of the Moho.

- A synthesis of our new RF results with ~~pre-existing~~pre-existing teleseismic tomography, shear wave splitting and ambient noise studies reveals a complex lithosphere that has clearly been impacted by orogeny (thickened crust), failed rifting beneath Bass Strait (thinned crust and complex crustal velocities), and recent intraplate volcanism (high  $V_p/V_s$  ratios and a radial pattern of fast anisotropy patterns above a presumed zone of mantle upwelling).

~~Results from this study advance our understanding of the nature and composition of different tectonic blocks that constitute the geology of the southern Tasmanides. These results will also be important for helping to understand the results from other comparable seismic imaging studies and the interpretation of tectonic processes on a wider scale.~~

## **9 Data availability**

Dataset available at [10.6084/m9.figshare.12233723](https://doi.org/10.6084/m9.figshare.12233723)

## **10 Author contributions**

M.B. performed the data analysis and wrote the draft manuscript. N.R. and D.C. guided the study and assisted in interpretation. M.B., D.C. and N.R. discussed the results and revised the manuscript. A.R. and O.L. revised the manuscript and assisted with the interpretation.

**11 Competing Interests:** The authors declare no competing interests.

## **12 Acknowledgments**

The work in this paper was performed as part of a PhD study and has been jointly funded by Abubakar Tafawa Balewa University (ATBU), Bauchi, Nigeria and the University of Aberdeen, UK. The authors acknowledge the efforts of staff, students and fieldwork technicians from the Australian National University and University of Tasmania, who deployed the temporary BASS array used in this study. We also thank Qi Li and Armando Arcidiaco for their efforts in BASS data pre-processing and archiving. Australian Research Council Grant LP110100256 supported the BASS deployment. We are grateful to IRIS and Geoscience Australia for providing data from several stations in mainland Australia and Tasmania. Figure 1 was made using Inkscape software (Harrington, et. al., 2005) and Figures 2, 3, 6 and 9 were produced using the Generic Mapping Tools (Wessel et al., 2013).

695

696

697

## 698 **References**

699 Amante, C. and Eakins, B. W.: ETOPO1 1 Arc-Minute Global Relief Model: Procedures, data sources and  
700 analysis, NOAA technical memorandum NESDIS NGDC-24, 19pp, 2009.

701 Ammon, C. J.: The isolation of receiver effects from teleseismic P waveforms. *Bull. Seis. Soc. Ame.*, 81, 2504–  
702 2510, 1991.

703 Ammon, C. J., Randall, G., and Zandt, G.: On the nonuniqueness of receiver function inversions. *J. Geophys.*  
704 *Res.*, 95, 15 303–15 318, 1990.

705 Arroucau, P., Rawlinson, N., and Sambridge, M.: New insight into Cainozoic sedimentary basins and  
706 Palaeozoic suture zones in southeast Australia from ambient noise surface wave tomography. *Geophys. Res.*  
707 *Lett.*, 37, <http://dx.doi.org/10.1029/2009GL041974>, 2010.

708 Bannister, S., Yu, J., Leitner, B., and Kennett, B. L. N.: Variations in crustal structure across the transition from  
709 West to East Antarctica, Southern Victoria Land, *Geophys. J. Int.*, 155, 870–884, 2003.

710 Bello, M., Cornwell, D. G., Rawlinson, N., and Reading, A. M.: Insights into the structure and dynamics of the  
711 upper mantle beneath Bass Strait, southeast Australia, using shear wave splitting, *Phys. Earth Planet. Inter.*,  
712 289, 45–62, <https://doi.org/10.1016/j.pepi.2019.02.002>, 2019a.

713 Bello, M., Rawlinson, N., Cornwell, D. G., Crowder, E., Salmon, M., and Reading, A. M.: Structure of the crust  
714 and upper mantle beneath Bass Strait, southeast Australia, from teleseismic body wave tomography, *Phys.*  
715 *Earth Planet. Inter.*, 294, <https://doi.org/10.1016/j.pepi.2019.106276>, 2019b.

716 Berry, R. F., Steele, D. A., and Maffre, S.: Proterozoic metamorphism in Tasmania: implications for tectonic  
717 reconstructions, *Prec. Res.*, 166, 387–396. <https://doi.org/10.1016/j.precamres.2007.05.004>, 2008.

718 Bodin, T., Salmon, M., Kennett, B. L. N., and Sambridge, M.: Probabilistic surface reconstruction from multiple  
719 datasets: an example for the Australian Moho, *J. Geophys. Res.: Solid Earth*, 117,  
720 <http://dx.doi.org/10.1029/2012JB009547>, 2012a.

721 Bodin, T., Sambridge, M., Rawlinson, N., and Arroucau, P.: Transdimensional tomography with unknown data  
722 noise, *Geophys. J. Int.*, 189, 1536–1556, 2012b.

723 Boger, S. and Miller, J.: Terminal suturing of Gondwana and the onset of the Ross Delamerian Orogeny: the  
724 cause and effect of an Early Cambrian reconfiguration of plate motions, *Earth Planet. Sci. Lett.*, 219, 35–48,  
725 2004.

726 Calvert, C. R. and Walter, M. R.: The Late Neoproterozoic Grassy Group of King Island, Tasmania: correlation  
727 and palaeogeographic significance, *Precam. Res.*, 100, 299–312, 2000.

728 Cawood, P. A.: Terra Australis Orogen: Rodinia breakup and development of the Pacific and Iapetus margins of  
729 Gondwana during the Neoproterozoic and Palaeozoic. *Earth-Science Reviews*, 69, 249–279,  
730 <http://dx.doi.org/10.1016/j.earscirev.2004.09.001>, 2005.

731 Cayley, R.: Exotic crustal block accretion to the eastern Gondwanaland margin in the Late Cambrian Tasmania,  
732 the Selwyn Block, and implications for the Cambrian–Silurian evolution of the Ross, Delamerian, and  
733 Lachlan orogens. *Gond. Res.*, 19, 628–649. <http://dx.doi.org/10.1016/j.gr.2010.11.013>, 2011a.

734 Cayley, R., Korsch, R. J., Moore, D. H., Costelloe, R. D., Nakamura, A., Willman, C. E., Rawlin, T. J., Morand,  
735 V. J., Skladzien, P. B., and O’Shea, P. J.: Crustal architecture of central Victoria: results from the 2006 deep  
736 crustal reflection seismic survey, *Aust. J. Earth Sci.*, 59, 113–156, 2011b.

- 737 ~~Cayley, R., Taylor, D. H., VandenBerg, A. H. M., and Moore, D. H.: Proterozoic–Early Palaeozoic rocks and~~  
 738 ~~the Tyennan Orogeny in central Victoria: the Selwyn Block and its tectonic implications, Aust. J. Earth Sci.,~~  
 739 ~~49, 225–254, 2002.~~
- 740 Chen, Y., Niu, F., Liu, R., Huang, Z., Tkalčić, H., Sun, L., and Chan, W.: Crustal structure beneath China from  
 741 receiver function analysis, *J. Geophys. Res.*, 49(B033067), 2010.
- 742 Chevrot, S. and van der Hilst, R. D.: The Poisson ratio of the Australian crust: Geological and Geophysical  
 743 implications, *Earth Planet. Sci. Lett.*, 183, 121–132, 2000.
- 744 Christensen, N. I.: Poisson’s ratio and crustal seismology, *J. Geophys. Res.*, 101, 3139–3156, 1996.
- 745 Christensen, N. I. and Fountain, D. M.: Constitution of the lower continental crust based on experimental studies  
 746 of seismic velocities in granulite, *Geol. Soc. Ame. Bull.*, 86, 227–236, 1975.
- 747 Clitheroe, G., Gudmundsson, O., and Kennett, B.: The crustal thickness of Australia, *J. Geophys. Res.*, 105, 13  
 748 697–13 713, 2000.
- 749 Collins, C. D. N.: The nature of crust–mantle boundary under Australia from seismic evidence, In: Drummond  
 750 B. J. ed. *The Australian lithosphere*, *Geol. Soc. Aust. Spec. Pub.*, 17, 67–80, 1991.
- 751 Collins, C. D. N., Drummond, B. J., and Nicoll, M. G.: Crustal thickness patterns in the Australian continent,  
 752 *Geol. Soc. Ame. Spec. Papers*, 372, 121–128, 2003.
- 753 Collins, W. J.: Nature of extensional accretionary origins, *Tectonics*, 21, 1024–1036, 2002.
- 754 Collins, W. J. and Vernon, R. H.: A rift–drift–delamination model of continental evolution: Palaeozoic tectonic  
 755 development of eastern Australia, *Tectonophysics*, 2(35), 1994.
- 756 Coney, P. J.: Plate tectonics and the Precambrian Phanerozoic evolution of Australia, PACRIM ’95, *Aust. Inst.*  
 757 *Mining and Metallurgy*, pages 145–150, 1995.
- 758 Coney, P. J., Edwards, A., Hine, R., Morrison, F., and Windrim, D.: The regional tectonics of the Tasman  
 759 orogenic system, eastern Australia, *J. Struct. Geol.*, 12(5/6), 519–543, 1990.
- 760 ~~Cornwell, D. G., P. K. H. Maguire, R. W. England, and G. W. Stuart (2010), Imaging detailed crustal structure~~  
 761 ~~and magmatic intrusion across the Ethiopian Rift using a dense linear broadband array, *Geochem. Geophys.*~~  
 762 ~~*Geosyst.*, **11**, Q0AB03, doi:10.1029/2009GC002637.~~
- 763 Crowder, E., Rawlinson, N., Pilia, S., Cornwell, D. G., and Reading, A. M.: Transdimensional ambient noise  
 764 tomography of Bass Strait, southeast Australia, reveals the sedimentary basin and deep crustal structure  
 765 beneath a failed continental rift, *Geophys. J. Int.*, 217, 970–987, 2019.
- 766 Davies, D. R., Rawlinson, N., Iaffaldano, N., and Campbell, I. H.: Lithospheric controls on magma composition  
 767 along Earth’s longest continental hotspot track, *Nature*, 525, 511–514, 2015.
- 768 ~~Direen, N. G., Lyons, P., Korsch, R. J., and Glen, R. A.: Integrated geophysical appraisal of crustal architecture~~  
 769 ~~in the Eastern Lachlan Orogen, *Explo. Geophys.*, 32, 252–262, 2001.~~
- 770 Drummond, B. J. and Collins, C. D. N.: Seismic evidence for underplating of the lower continental crust of  
 771 Australia, *Earth Planet. Sci. Lett.*, 79, 361–372, 1986.
- 772 Drummond, B. J., Lyons, P., Goleby, B., and Jones, L.: Constraining models of the tectonic setting of the giant  
 773 Olympic Dam iron-oxide-copper-gold deposit, south Australia, using deep seismic reflection data,  
 774 *Tectonophysics*, 420, 91–103, 2006.
- 775 Eagar, K. C. and Fouch, M. J.: FuncLab: A MATLAB interactive toolbox for handling receiver function  
 776 datasets, *Seismo. Res. Lett.*, <https://doi.org/10.1785/gssrl.83.3.596>, 2012.



- 777 Finlayson, D. M., Collins, C. D. N., and Denham, D.: Crustal structure under the Lachlan Fold Belt,  
778 southeastern Australia, *Phys. Earth Planet. Int.*, 21, 321–342, 1980.
- 779 Finlayson, D. M., Korsch, R. J., Glen, R. A., Leven, J. H., and Johnstone, D. W.: Seismic imaging and crustal  
780 architecture across the Lachlan transverse zone, a crosscutting feature of eastern Australia, *Aust. J. Earth  
781 Sci.*, 49, 311–321, 2002.
- 782 Fishwick, S. and Rawlinson, N.: 3–D structure of the Australian lithosphere from evolving seismic datasets,  
783 *Aust. J. Earth Sci.*, 59, 809–826, 2012.
- 784 Foden, J., Elburg, M. A., Dougherty-Page, J., and Burt, A.: The timing and duration of the Delamerian  
785 Orogeny: correlation with the Ross Orogen and implications for Gondwana assembly, *J. Geology*, 114, 189–  
786 210, 2006.
- 787 Fontaine, F. R., Tkalčić, H., and Kennett, B. L. N.: Crustal complexity in the Lachlan Orogen revealed from  
788 teleseismic receiver functions, *Aust. J. Earth Sci.*, 60, 413–430, 2013a.
- 789 Fontaine, F. R., Tkalčić, H., and Kennett, B. L. N.: Imaging crustal structure variation across southeastern  
790 Australia, *Tectonophysics*, 582, 112–125, 2013b.
- 791 Foster, D. A. and Gray, D. R.: Evolution and structure of the Lachlan Fold Belt (Orogen) of eastern Australia,  
792 *Annu. Rev. Earth Planet. Sci.*, 28, 47–80, 2000.
- 793 Gaina, C., Müller, D., Royer, J. Y., Stock, J., Hardebeck, J., and Symonds, P.: The tectonic history of the  
794 Tasman Sea, a puzzle with 13 pieces, *J. Geophys. Res.*, 103, 12,413–12,433, 1998.
- 795 Gibson, G. M., Morse, M. P., Ireland, T. R., and Nayak, G. K.: Arc-continent collision and orogenesis in  
796 western Tasmanides: insights from reactivated basement structures and formation of an ocean-continent  
797 transform boundary off western Tasmania, *Gondwana Res.*, 19, 608–627, 2011.
- 798 Glen, R. A.: The Tasmanides of Eastern Australia. In: Vaughan, A. P. M., Leat, P. T., Pankhurst, R. J. (Eds.),  
799 *Terrane Processes at the Margins of Gondwana*, Geological Society, pages 23–96, 2005.
- 800 Glen, R. A.: Refining accretionary orogen models for the Tasmanides of eastern Australia, *Aust. J. Earth Sci.*,  
801 60, 315–370, 2013.
- 802 Glen, R. A., Korsch, R. J., Direen, N. G., Jones, L. E. A., Johnstone, D. W., Lawrie, K. C., Finlayson, D. M.,  
803 and Shaw, R. D.: Crustal structure of the Ordovician Macquarie Arc, eastern Lachlan Orogen, based on  
804 seismic–reflection profiling, *Aust. J. Earth Sci.*, 49, 323–348, 2002.
- 805 Glen, R. A., Percival, I. G., and Quinn, C. D.: Ordovician continental margin terranes in the Lachlan Orogen,  
806 Australia: implications for tectonics in an accretionary orogen along the east Gondwana margin, *Tectonics*,  
807 28, <https://doi.org/10.1029/2009TC002446>, 2009.
- 808 Goldstein, P., Dodge, D., Firpo, M., and Minner, L.: SAC2000: Signal processing and analysis tools for  
809 seismologists and engineers. Lee, W. H. K. and Kanamori, H. and Jennings, P. C. and Kisslinger, C. (Eds.).  
810 In *IASPEI International Handbook of Earthquake and Engineering Seismology*, Academic Press, London,  
811 2003.
- 812 Gouveia, W. P. and Scales, J. A.: Bayesian seismic waveform inversion: Parameter estimation and uncertainty  
813 analysis, *J. Geophys. Res.*, 103, 2759–2779, 1998.
- 814 Gray, D. R. and Foster, D. A.: Tectonic evolution of the Lachlan Orogen, southeastern Australia: historical  
815 review, data synthesis and modern perspectives, *Aust. J. Earth Sci.*, 51, 773–817, 2004.
- 816 Gunn, P. J., Maidment, D. W., and Milligan, P.: Interpreting aeromagnetic data in areas of limited outcrop,  
817 *AGSO J. Aust. Geol. Geophys.*, 17, 175–185, 1997.
- 818 Harrington, B. et al (2004–2005). Inkscape. <http://www.inkscape.org/>.

- 819 Haskell, N. A.: The dispersion of surface waves in multilayered media, *Bulletin of the Seismological Society*  
820 America, 43, 1734, <http://dx.doi.org/10.1038/physci245109a0>, 1953.
- 821 He, C. S., Santosh, M., Dong, S. W., and Wang, S. C.: Crustal thickening and uplift of the Tibetan Plateau  
822 inferred from receiver function analysis, *J. Asian Earth Sci.*, 99, 112–124, 2015.
- 823 Heintz, M. and Kennett, B. L. N.: Continental scale shear wave splitting analysis: Investigation of seismic  
824 anisotropy underneath the Australian continent, *Earth Planet. Sci. Lett.*, 236, 106–119, 2005.
- 825 ~~Kennett, B. L. N., Engdhal, E. R., and Buland, R.: Constraints on seismic velocities in the earth from travel~~  
826 ~~times. *Geophys. J. Int.*, 125, 228–248, 1995.~~
- 827 Kennett, B. L. N. and Furumura, T.: Stochastic waveguide in the lithosphere: Indonesian subduction zone to  
828 Australian craton, *Geophys. J. Int.*, 172, 363–382, 2008.
- 829 Kennett, B. L. N., Salmon, M., Saygin, E., and Group, A.: AusMoho: the variation of Moho depth in Australia,  
830 *Geophys. J. Int.*, 187, 946–958, 2011.
- 831 Korsch, R. J., Barton, T. J., Gray, D. R., Owen, A. J., and Foster, D. A.: Geological interpretation of a deep  
832 seismic reflection transect across the boundary between the Delamerian and Lachlan Orogens, in the vicinity  
833 of the Grampians, western Victoria, *Aust. J. Earth Sci.*, 49, 1057–1075, [http://dx.doi.org/10.1046/j.1440-](http://dx.doi.org/10.1046/j.1440-0952.2002.00963.x)  
834 [0952.2002.00963.x](http://dx.doi.org/10.1046/j.1440-0952.2002.00963.x), 2002.
- 835 Langston, C. A.: Structure under Mount Rainier, Washington, inferred from teleseismic body waves, *J.*  
836 *Geophys. Res.*, 84, 4749–4762, <https://doi.org/10.1071/EG994019>, 1979.
- 837 Li, Z. X., Baillie, P. W., and Powell, C. M.: Relationship between northwestern Tasmania and East  
838 Gondwanaland in the Late Cambrian/Early Ordovician Paleomagnetic evidence, *Tectonics*, 16, 161–171,  
839 <http://dx.doi.org/10.1029/96TC02729>, 1997.
- 840 Ligorria, J. P. and Ammon, C. J.: Iterative deconvolution and receiver function estimation, *Bull. Seism. Soc.*  
841 *Ame.*, 89, 1395–1400, 1999.
- 842 ~~Mavko, M.: Velocity and attenuation in partially molten rocks, *J. Geophys. Res.*, 85, 5173–5189, [https://doi.org/](https://doi.org/10.1029/JB085iB10p05173)~~  
843 ~~[10.1029/JB085iB10p05173](https://doi.org/10.1029/JB085iB10p05173), 1980.~~
- 844 Moore, D., Betts, P. G., and Hall, M.: Fragmented Tasmania: the transition from Rodinia to Gondwana, *Aust. J.*  
845 *Earth Sci.*, 62, 1–35, 2015.
- 846 Moore, D. H., Betts, P. G., and Hall, M.: Constraining the VanDieland microcontinent at the edge of East  
847 Gondwana, Australia, *Tectonophysics*, 687, 158–179, 2016.
- 848 Moresi, L., Betts, P. G., Miller, M. S., and Cayley, R. A.: Dynamics of continental accretion, *Nature*, 508, 245–  
849 248, 2014.
- 850 Morse, M., Gibson, G., and Mitchell, C.: Basement constraints on offshore basin architecture as determined by  
851 new aeromagnetic data acquired over Bass Strait and western margin of Tasmania, *ASEG Extended*  
852 *Abstracts* 2009, pages 1–9, <http://dx.doi.org/10.1071/ASEG2009ab042>, 2009.
- 853 ~~O'Connell, R. J. and Budiansky, B.: Seismic velocities in dry and saturated cracked solids, *J. Geophys. Res.*, 79,~~  
854 ~~5412–5426, 1974.~~
- 855 Owens, T. J., Taylor, S. R., and Zandt, G.: Crustal structure at regional seismic test network stations determined  
856 from inversion of broadband teleseismic P waveforms, *Bull. Seismo. Soc. Ame.*, 77, 631–632, 1987.
- 857 Owens, T. J. and Zandt, G.: Implications of crustal property with variations for models of Tibetan Plateau  
858 evolution, *Nature*, 387, 37–43, 1997.
- 859 Pan, S. Z. and Niu, F. L.: Large contrasts in crustal structure and composition between the Ordos plateau and the

- 860 NE Tibetan plateau from receiver function analysis, *Earth Plan. Sci. Lett.*, 303, 291–298, 2011.
- 861 Pilia, S., Arroucau, P., Rawlinson, N., Reading, A. M., and Cayley, R. A.: Inherited crustal deformation along  
862 the East Gondwana margin revealed by seismic anisotropy tomography, *Geophys. Res. Lett.*, 43(23), 12082–  
863 12090, <https://doi.org/10.1002/2016GL071201>, 2016.
- 864 Pilia, S., Rawlinson, N., Cayley, R. A., Musgrave, R., Reading, A. M., Direen, N. G., and Young, M. K.:  
865 Evidence of micro-continent entrainment during crustal accretion, *Sci. Rep.*, 5,  
866 <http://dx.doi.org/10.1038/srep08218>, 2015a.
- 867 Pilia, S., Rawlinson, N., Green, N. G., Reading, A. M., Cayley, R., Pryer, L., Arroucau, P., and Duffet, M.:  
868 Linking mainland Australia and Tasmania using ambient seismic noise tomography: Implications for the  
869 tectonic evolution of the east Gondwana margin, *Gond. Res.*, 28, 1212–1227, 2015b.
- 870 Porritt, S. W. and Miller, M. S.: Updates to FuncLab, a Matlab based GUI for handling receiver functions,  
871 *Computers and Geosciences*, 111, 260–271, <https://doi.org/10.1016/j.cageo.2017.11.022>, 2018.
- 872 Rawlinson, N., Davies, D. R., and Pilia, S.: The mechanisms underpinning Cenozoic intraplate volcanism in  
873 eastern Australia, Insights from seismic tomography and geodynamic modeling, *Geophys. Res. Lett.*, 44(19),  
874 9,681–9,690, 2017.
- 875 Rawlinson, N., Housman, G. A., Collins, C. D. N., and Drummond, B. J.: New evidence of Tasmania’s tectonic  
876 history from a novel seismic experiment, *Geophys. Res. Lett.*, 28, 3337–3340, 2001.
- 877 Rawlinson, N. and Kennett, B.: Teleseismic tomography of the upper mantle beneath the southern Lachlan  
878 Orogen, Australia, *Phys. Earth Planet. Inter.*, 167, 84–97, <http://dx.doi.org/10.1016/j.pepi.2008.02.07>, 2008.
- 879 Rawlinson, N., Kennett, B., Vanacore, E., Glen, R., and Fishwick, S.: The structure of the upper mantle beneath  
880 the Delamerian and Lachlan orogens from simultaneous inversion of multiple teleseismic datasets, *Gond.*  
881 *Res.*, 19, 788–799, 2011.
- 882 Rawlinson, N., Kennett, B. L. N., Salmon, M., and Glen, R. A.: Origin of lateral heterogeneities in the upper  
883 mantle beneath Southeast Australia from seismic tomography, Khan, A., and Deschamps, F. (Eds.), In *The*  
884 *Earth’s Heterogeneous Mantle: A Geophysical, Geodynamical and Geochemical Perspective*, pages 47–78,  
885 Springer Geophysics, Springer, 2015.
- 886 Rawlinson, N., Pilia, S., Young, M., Salmon, M., and Yang, Y.: Crust and upper mantle structure beneath  
887 southeast Australia from ambient noise and teleseismic tomography, *Tectonophysics*, 689, 143–156,  
888 <http://dx.doi.org/10.1016/j.tecto.2015.11.034>, 2016.
- 889 Rawlinson, N., Pozgay, S., and Fishwick, S.: Seismic tomography: a window into deep Earth, *Phys. Earth*  
890 *Planet. Inter.*, 178, 101–135, 2010.
- 891 Rawlinson, N. and Urvoy, M.: Simultaneous inversion of active and passive source datasets for 3–D seismic  
892 structure with application to Tasmania, *Geophys. Res. Lett.*, 33, 2006.
- 893 ~~Reading, A. M., Tkalčić, H., Kennett, B. L. N., Johnson, S. P., and Sheppard, S.: Seismic structure of the crust~~  
894 ~~and uppermost mantle of the Capricorn and Paterson Orogens and adjacent cratons, Western Australia, from~~  
895 ~~passive seismic transects, *Proc. Res.*, 196–197, 295–308, 2011.~~
- 896 Sambridge, M. S.: Geophysical inversion with a neighbourhood algorithm – I. Searching a parameter space,  
897 *Geophys. J. Int.*, 138, 479–494, 1999a.
- 898 Sambridge, M. S.: Geophysical inversion with a neighbourhood algorithm -II. Appraising the ensemble,  
899 *Geophys. J. Int.*, 138, 479–494, 1999b.
- 900 Saygin, E. and Kennett, B. L. N.: Ambient seismic noise tomography of Australian continent, *Tectonophysics*,  
901 481, 116–125, <http://dx.doi.org/10.1016/j.tecto.2008.11.013>, 2010.

- 902 Shibutani, T., Sambridge, M. S., and Kennett, B. L. N.: Genetic algorithm inversion for receiver functions with  
 903 application to crust and uppermost mantle structure beneath Eastern Australia, *Geophys. Res. Lett.*,  
 904 23,1826–1832, 1996.
- 905 Spaggiari, C. V., Gray, D. R., and Foster, D. A.: Lachlan Orogen subduction–accretion systematics revisited,  
 906 *Aust. J. of Earth Sci.*, 51, 549–553, 2004.
- 907 Spaggiari, C. V., Gray, D. R., Foster, D. A., and McKnight, S.: Evolution of the boundary between the western  
 908 and central Lachlan Orogen: implications for Tasmanide tectonics, *Aust. J. Earth Sci.*, 50, 725–749, 2003.
- 909 Teasdale, J., Pryer, L., Stuart-Smith, P., Romine, K., Etheridge, M., Loutit, T., and Kyan, D.: Structural  
 910 framework and basin evolution of Australia’s Southern Margin, *APPEA J. Australian Petroleum Production*  
 911 *and Exploration Association*, 43, 13–38, <https://doi.org/10.1785/0120030123>, 2003.
- 912 Thomson, W. T.: Transmission of elastic waves through a stratified solid, *J. of App. Phys.*, 21, 89–93, 1950.
- 913 Tkalčić, H., Chen, Y., Liu, R., Huang, H., Sun, L., and Chan, W.: Multi–step modelling of teleseismic receiver  
 914 functions combined with constraints from seismic tomography: Crustal structure beneath southeast China,  
 915 *Geophys. J. Int.*, 187, 303–326, 2011.
- 916 Tkalčić, H., Rawlinson, N., Arroucau, P., and Kumar, A.: Multistep modelling of receiver-based seismic and  
 917 ambient noise data from WOMBAT array: crustal structure beneath southeast Australia, *Geophys. J. Int.*,  
 918 189, 1681–1700, <https://doi.org/10.1111/j.1365-246X.2012.05442>, 2012.
- 919 Wessel, P., Smith, W. H., Scharroo, R., Louis, J., and Wobbe, F.: Generic mapping tools: improved version  
 920 released, *EOS Trans. Am. Geophys. Union*, 94, 409–420, 2013.
- 921 ~~White, L., Gibson, G., and Lister, G.: A reassessment of paleogeographic reconstructions of eastern Gondwana:  
 922 bringing geology back into the equation, *Gond. Res.*, 24, 984–998, <http://dx.doi.org/10.1016/j.gr.2013.06.00>, 2013.~~
- 924 Young, M. K., Cayley, R. A., McLean, M. A., Rawlinson, N., Arroucau, P., and Salmon, M.: Crustal structure  
 925 of the east Gondwana margin in southeast Australia revealed by transdimensional ambient seismic noise  
 926 tomography, *Geophys. Res. Lett.*, 40, 4266–4271, 2013.
- 927 Young, M. K., Rawlinson, N., Arroucau, P., Reading, A., and Tkalčić, H.: High–frequency ambient noise  
 928 tomography of southeast Australia: new constraints on Tasmania’s tectonic past, *Geophys. Res. Lett.*, 38,  
 929 <http://dx.doi.org/10.1029/2011GL047971>, 2011.
- 930 Young, N., Tkalčić, H., Rawlinson, N., and Reading, A. M.: Full waveform moment tensor inversion in a low  
 931 seismicity region using multiple teleseismic datasets and ambient noise: application to the 2007 Shark Bay,  
 932 Western Australia, *Earthquake. Geophys. J. Int.*, 188,1303–1321, [https://doi.org/10.1111/j.1365-](https://doi.org/10.1111/j.1365-246X.2011.05326)  
 933 [246X.2011.05326](https://doi.org/10.1111/j.1365-246X.2011.05326), 2012.
- 934 Zhu, L. and Kanamori, H.: Moho depth variation in southern California from teleseismic receiver functions, *J.*  
 935 *Geophys. Res.*, 105, 2969–2980, 2000.

936

937

Table 1: Model parameter bounds used in the Neighbourhood Algorithm receiver function inversion.  $V_s^{upper}$  and  $V_s^{lower}$  represent the  $S$ -velocity at the top and bottom of a layer respectively.  $V_p/V_s$  represents  $P$  and  $S$  wave velocity ratio within a layer.

| Layer        | Thickness (m) | $V_s^{upper}$ (km/s) | $V_s^{lower}$ (km/s) | $V_p/V_s$ |
|--------------|---------------|----------------------|----------------------|-----------|
| Sediment     | 0-2           | 0.5-1.5              | 0.5-1.5              | 2.00-3.00 |
| Basement     | 0-3           | 1.8-2.8              | 1.8-2.8              | 1.65-2.00 |
| Upper crust  | 3-20          | 3.0-3.8              | 3.0-3.9              | 1.65-1.80 |
| Middle crust | 4-20          | 3.4-4.3              | 3.4-4.4              | 1.65-1.80 |
| Lower crust  | 5-15          | 3.5-4.8              | 3.6-4.9              | 1.65-1.80 |
| Mantle       | 5-20          | 4.0-5.0              | 4.0-5.0              | 1.70-1.90 |

938

939

940

941

942

943

944

945

946

947

948

949 **Table 2:** Summary of H-κ stacking and NA inversion results for the current study.

| Basic station information |              |         |         |              | Results                           |                              |                                   |                           |                             |
|---------------------------|--------------|---------|---------|--------------|-----------------------------------|------------------------------|-----------------------------------|---------------------------|-----------------------------|
| Type                      | Station name | Lon (°) | Lat (°) | No of<br>RFs | Moho Depth (km)<br>(H-K stacking) | Bulk Vp/Vs<br>(H-K stacking) | Moho Depth (km)<br>(NA inversion) | Quality<br>(NA inversion) | Moho type<br>(NA inversion) |
| Temporary stations        | BA02         | 145.20  | -40.95  | 9            | 23.2±5.0                          | 1.83±0.31                    | =                                 | Moderate                  | Not evident                 |
|                           | BA03         | 145.84  | -41.20  | 8            | =                                 | =                            | =                                 | Moderate                  | Not evident                 |
|                           | BA07         | 148.31  | -40.43  | 6            | 32.5±0.1                          | 1.70±0.02                    | 28                                | Good                      | Sharp                       |
|                           | BA08         | 147.97  | -39.77  | 8            | 31.9±0.1                          | 1.70±0.07                    | =                                 | Poor                      | =                           |
|                           | BA09         | 147.32  | -39.47  | 8            | 32.8±1.7                          | 1.71±0.07                    | 32                                | Good                      | Sharp                       |
|                           | BA11         | 143.98  | -39.64  | 12           | 30.5±2.1                          | 1.65±0.07                    | =                                 | =                         | =                           |
|                           | BA13         | 148.83  | -37.63  | 24           | 37.7±2.9                          | 1.74±0.10                    | 40                                | Good                      | Sharp                       |
|                           | BA17         | 146.33  | -39.04  | 20           | 30.9±2.5                          | 1.76±0.10                    | 29                                | Good                      | Broad                       |
|                           | BA18         | 146.14  | -38.02  | 3            | =                                 | =                            | 38                                | Good                      | Sharp                       |
|                           | BA19         | 145.69  | -38.57  | 20           | 25.5±2.4                          | 1.93±0.14                    | =                                 | Good                      | Not evident                 |
|                           | BA20         | 144.92  | -38.42  | 30           | 26.3±1.6                          | 1.93±0.12                    | 29                                | Good                      | Sharp                       |
|                           | BA22         | 143.61  | -37.99  | 5            | =                                 | =                            | 29                                | Poor                      | Sharp                       |
|                           | BA24         | 142.54  | -38.26  | 4            | =                                 | =                            | 33                                | Poor                      | Sharp                       |
| Permanent stations        | TAU          | 147.32  | -42.91  | 41           | 33.5±1.9                          | 1.70±0.08                    | 33                                | Poor                      | Intermediate                |
|                           | MOO          | 147.19  | -42.44  | 58           | 33.0±1.2                          | 1.71±0.04                    | 34                                | Good                      | Sharp                       |
|                           | TOO          | 145.59  | -37.57  | 276          | 37.5±1.2                          | 1.68±0.04                    | 36                                | Good                      | Sharp                       |
|                           | YNG          | 148.40  | -34.20  | 178          | 37.3±0.5                          | 1.76±0.04                    | 35                                | Good                      | Sharp                       |
|                           | CAN          | 149.00  | -35.32  | 402          | 39.1±0.5                          | 1.73±0.02                    | 40                                | Good                      | Sharp                       |
|                           | CNB          | 149.36  | -35.32  | 155          | 38.5±1.1                          | 1.70±0.04                    | 39                                | Good                      | Broad                       |
|                           | MILA         | 149.16  | -37.05  | 4            | 37.6±2.1                          | 1.73±0.06                    | =                                 | =                         | =                           |



950  
951  
952  
953  
954

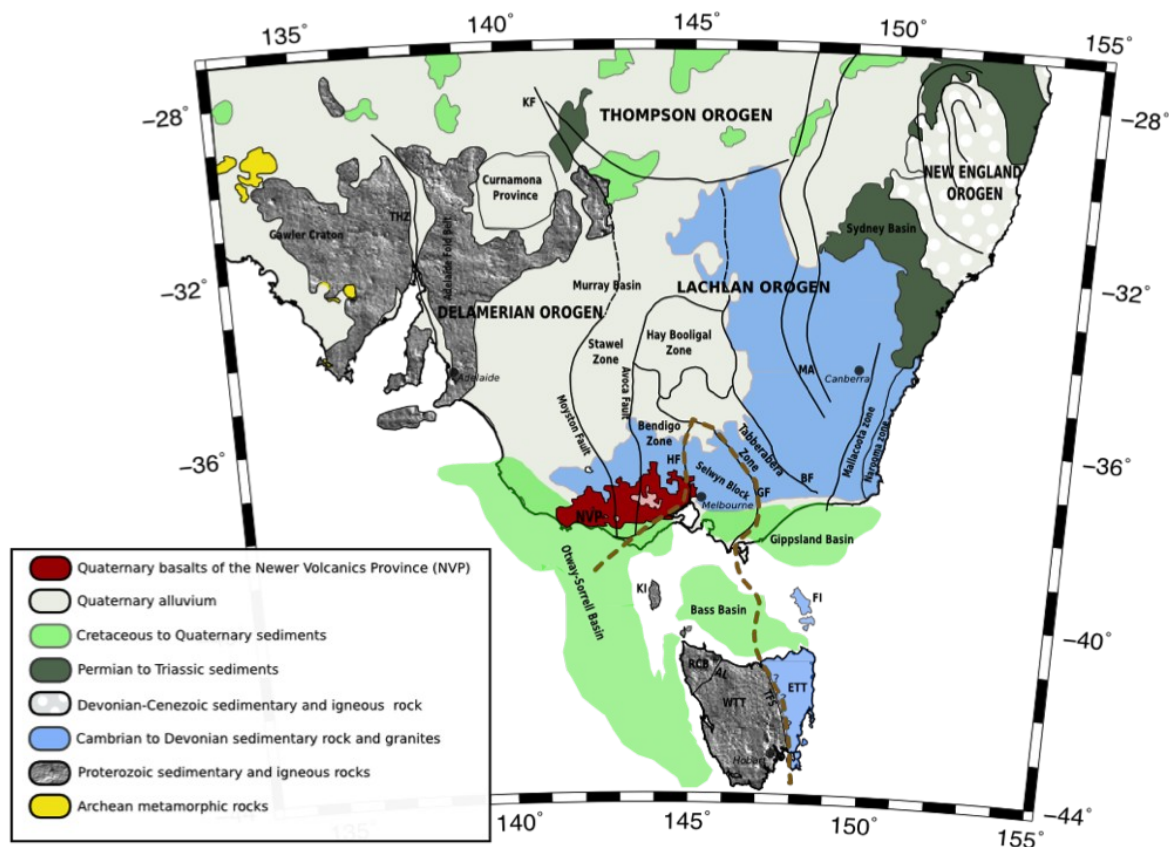

956 **Figure 1: Regional map of southeastern Australia that shows key geological boundaries and the location of observed**  
 957 **or inferred tectonic units (Modified from Bello et al., 2019a). Thick black lines delineate structural boundaries and**  
 958 **the thick brown dashed line traces out the boundary of Van Diemen's Land. HF = Heathcote Fault; GF = Governor Fault;**  
 959 **BF = Bootheragandra Fault; KF = Koonenberry Fault; THZ = Torrens Hinge Zone; MA = Macquarie Arc, NVP =**  
 960 **Newer Volcanics Province;; KI = King Island and FI = Flinders Island in Bass Strait; WTT = West Tasmania**  
 961 **Terrane; ETT = East Tasmania Terrane; AL = Arthur Lineament; TFS = Tamar Fracture System and RCB = Rocky**  
 962 **Cape Block. Outcrop boundaries are sourced from Rawlinson et al. 2016.**

963  
964  
965

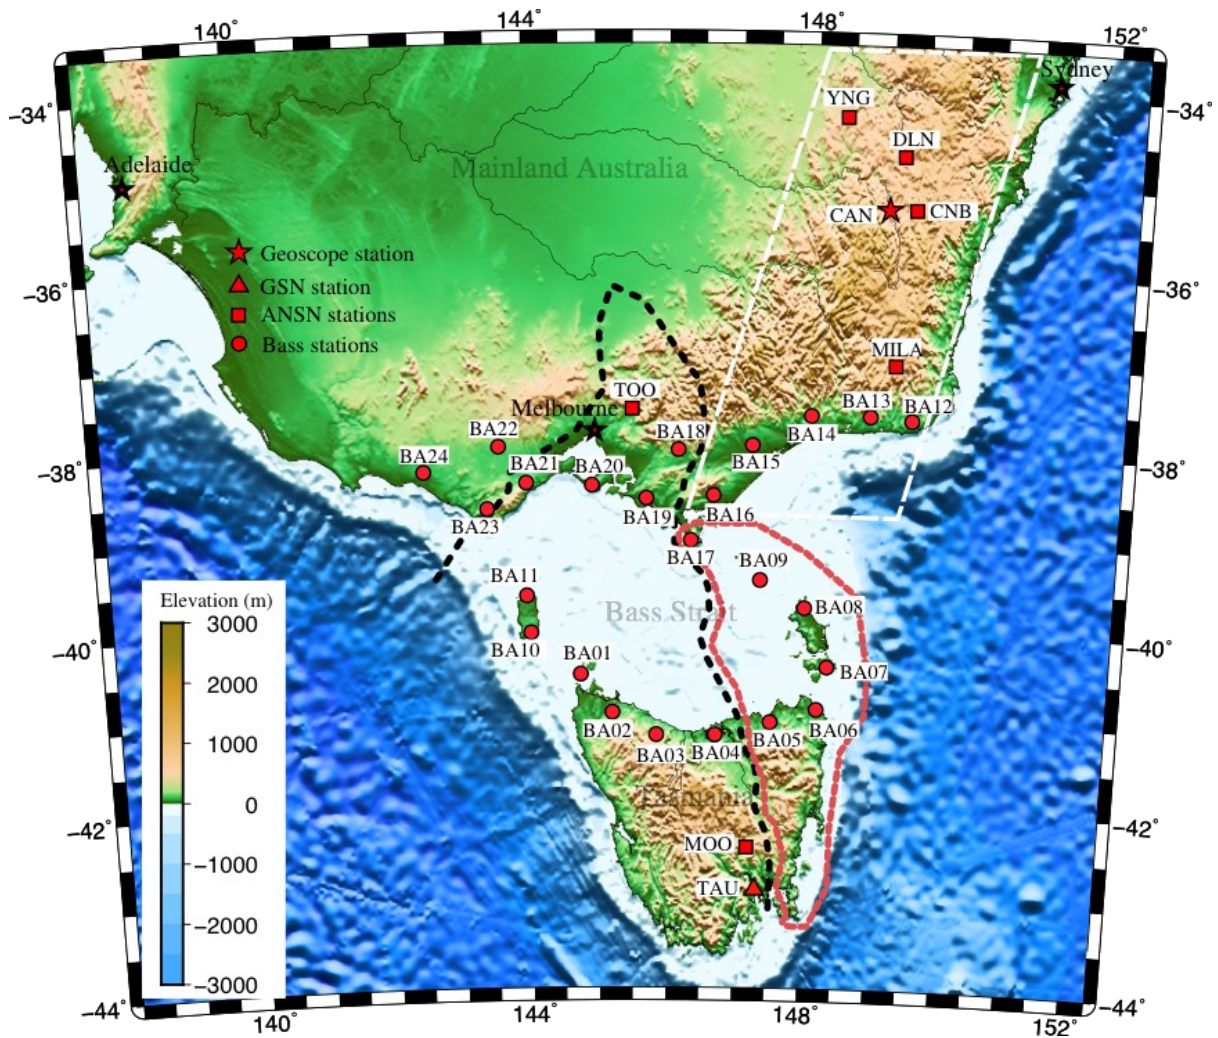

Figure 2: Location of seismic stations used in this study superimposed on a topographic/bathymetric map of southeast Australia (modified from Bello et al., 2019a). The boundary of VanDieland is delineated by a thick black dashed line. Thick red dashed line outlines the boundary of the East Tasmania Terrane and Furneaux Islands. Thick white dashed line highlights the eastern sector of the Lachlan Fold Belt. Topography/bathymetry is based on the [ETOPO1](#) dataset (Amante and Eakins, 2009).



974  
975  
976

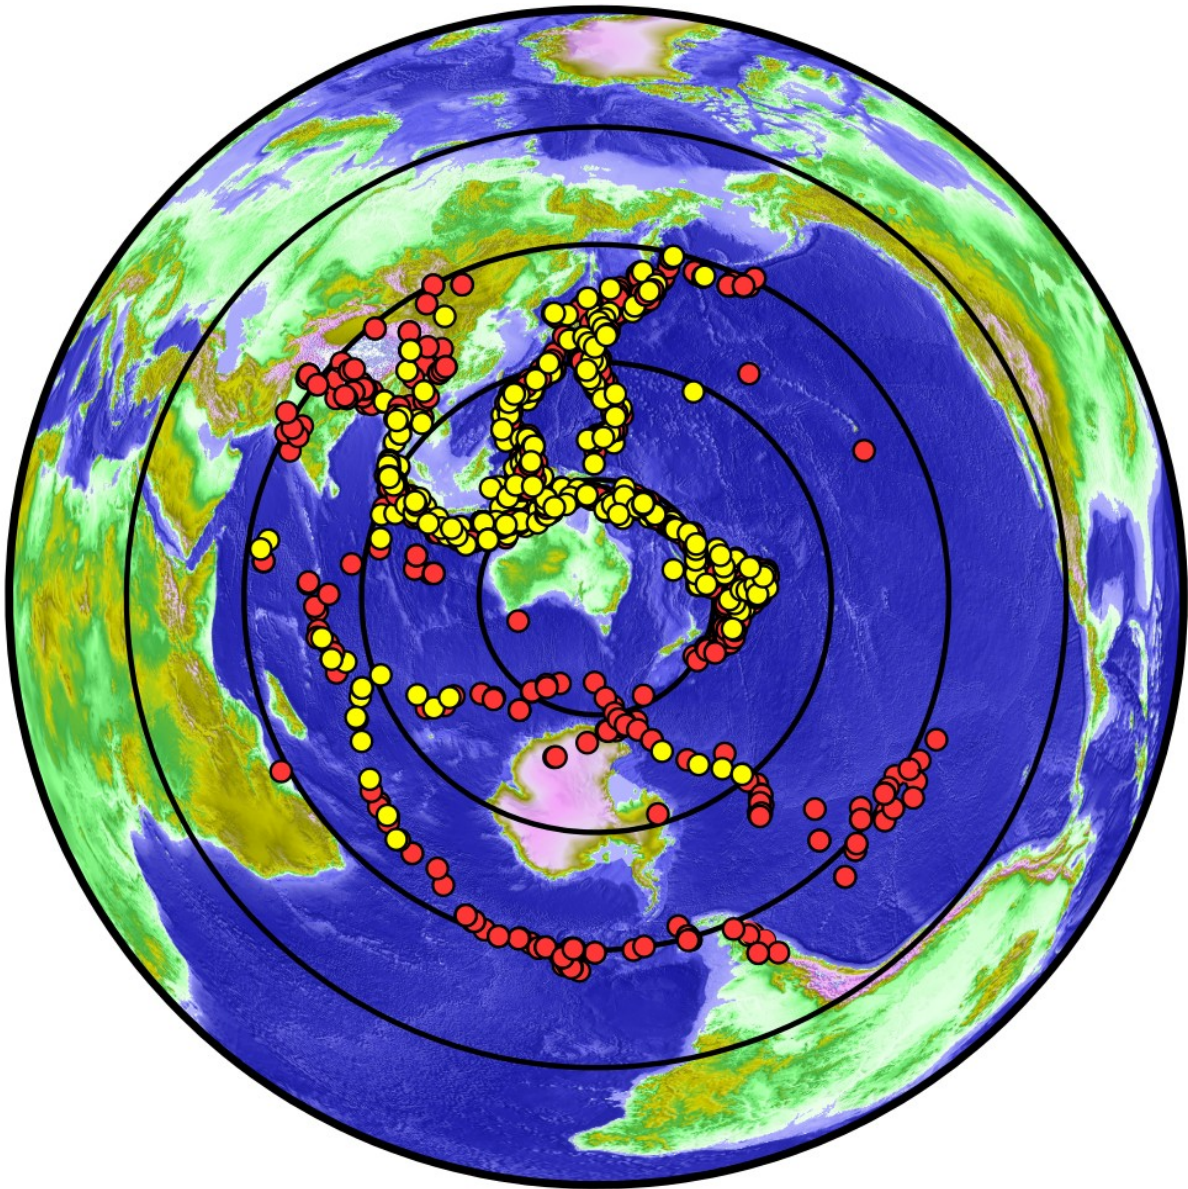

978 **Figure 3: Distribution of distant earthquakes (teleseisms) used in this study. The locations of events that are**  
979 **ultimately used for RF analysis are denoted by yellow dots. Concentric circles are plotted at 30° intervals from the**  
980 **centre of Bass Strait. Topography/bathymetry colours are is based on the Etopo1 dataset (Amante and Eakins, 2009).**

981

982  
983

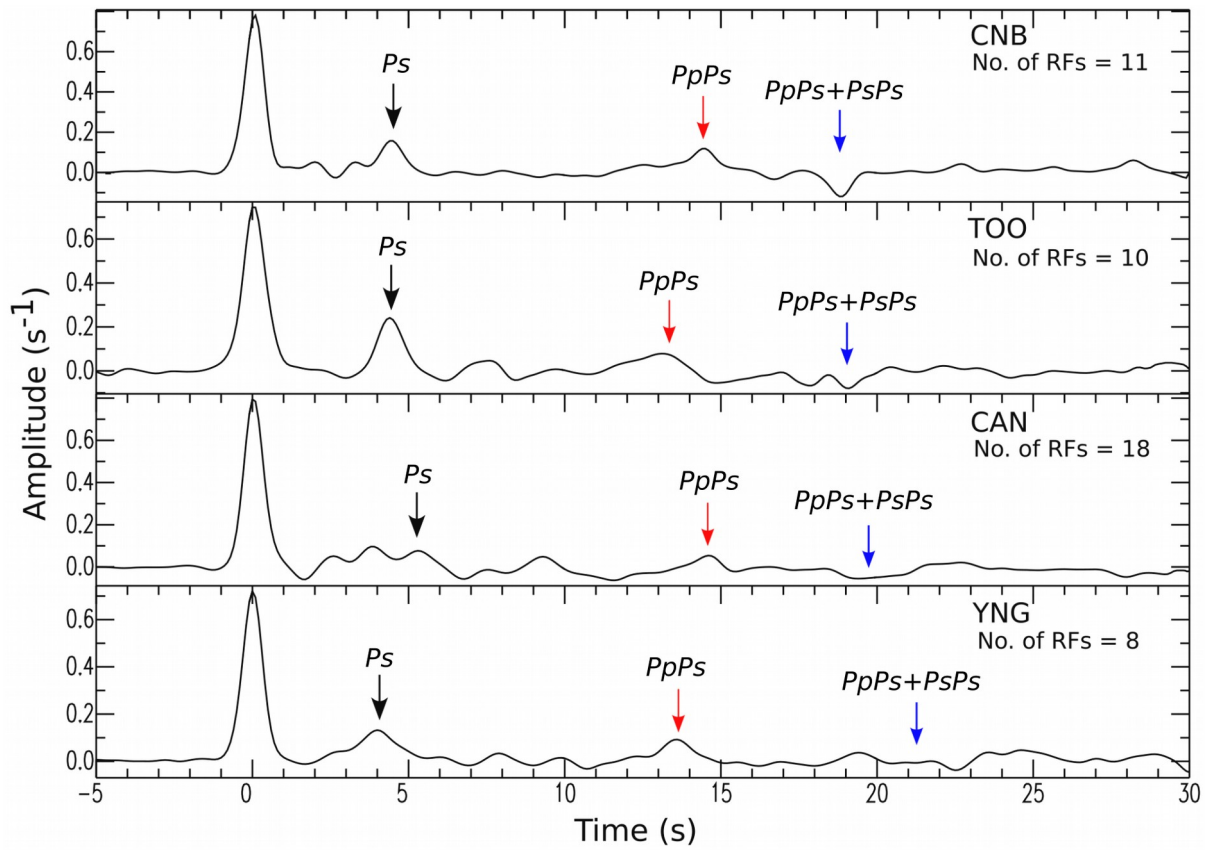

984 **Figure 4: Stacked receiver functions from Australian National Seismic Network (ANSN) stations TOO, YNG, MOO**  
 985 **and GSN station TAU. Small arrows indicate arrival of the *Ps* (black), *PpPs* (red) and *PpPs + PsPs* (blue) phases from**  
 986 **the Moho.**

987  
988  
989

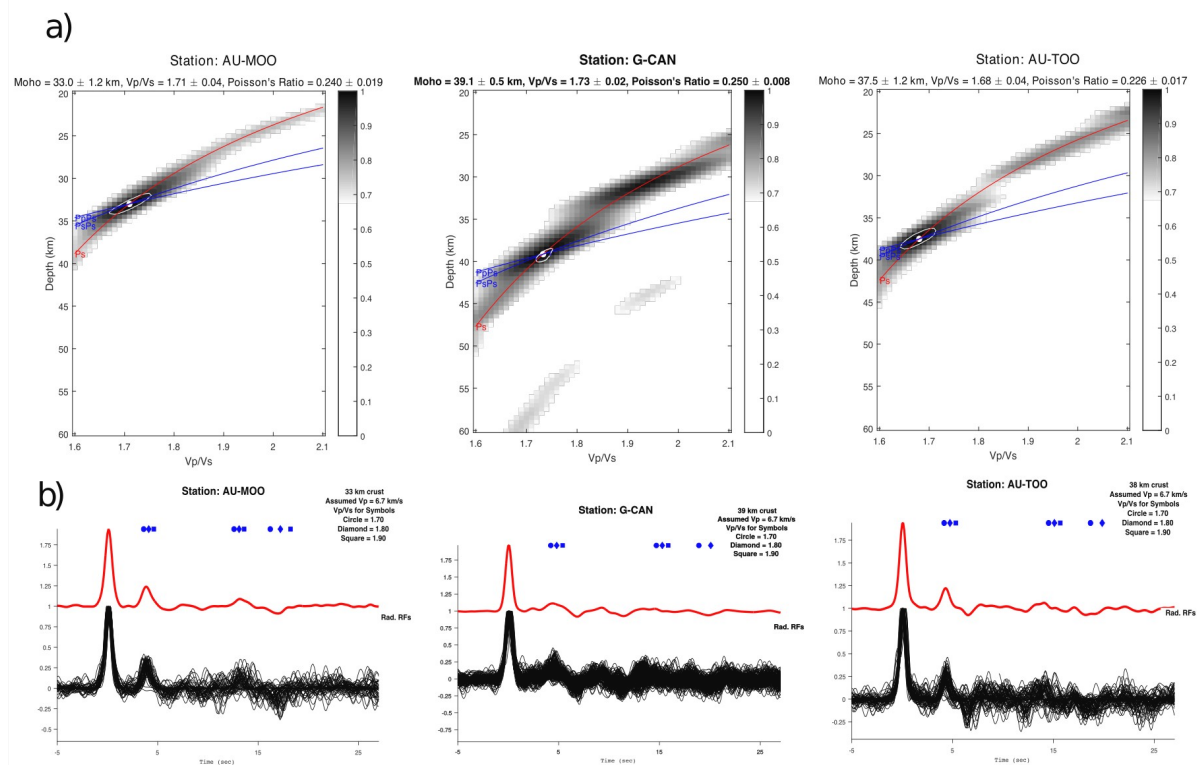

991 **Figure 5: Results from the  $H$ - $\kappa$  stacking analysis for RFs (Zhu and Kanamori, 2000) at stations MOO, CAN and**  
992 **TOO. In each case (a)  $\kappa$ -Normalised amplitudes of the stack over all back-azimuths along the travel time curves**  
993 **corresponding to the  $P_s$  and  $P_pP_s$  phases. (b) Corresponding stacked receiver function for each station.**

994  
995  
996

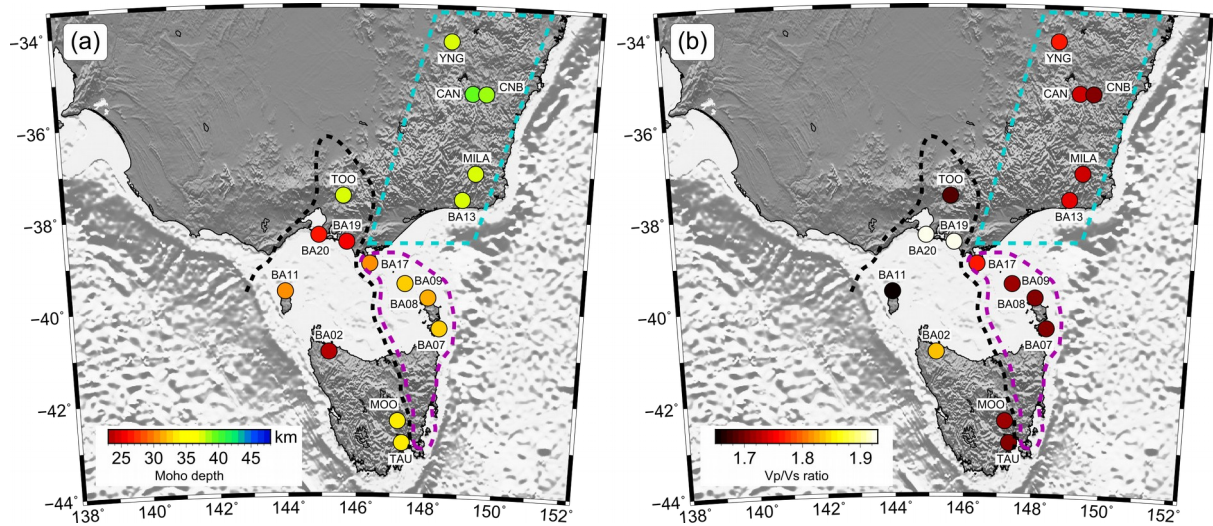

998 **Figure 6: (a) Variations in crustal thickness and (b)  $V_p/V_s$  ratio taken from the linear ( $H-\kappa$ ) stacking results (Table 2).**  
999 **Crustal thickness varies between  $\sim 23.0 \pm 0.1$  km and  $\sim 39.1 \pm 0.5$  km. Thinner crust in Bass Strait can be seen**  
1000 **flanked by a relatively thicker crust to the north and south.  $V_p/V_s$  ratios vary from  $\sim 1.655 \pm 0.02$  to  $1.75 \pm 0.02$  to**  
1001 **1.93. Thick black dashed line denotes the boundary of VanDieland. Thick magenta dashed line outlines the**  
1002 **boundary of East Tasmania Terrane and eastern Bass Strait (ETT+EB). Thick cyan dashed line highlights the**  
1003 **eastern part of the Lachlan Fold Belt. Topography/bathymetry is based on the Etopo1 dataset (Amante**  
1004 **and Eakins, 2009).**



1005  
1006

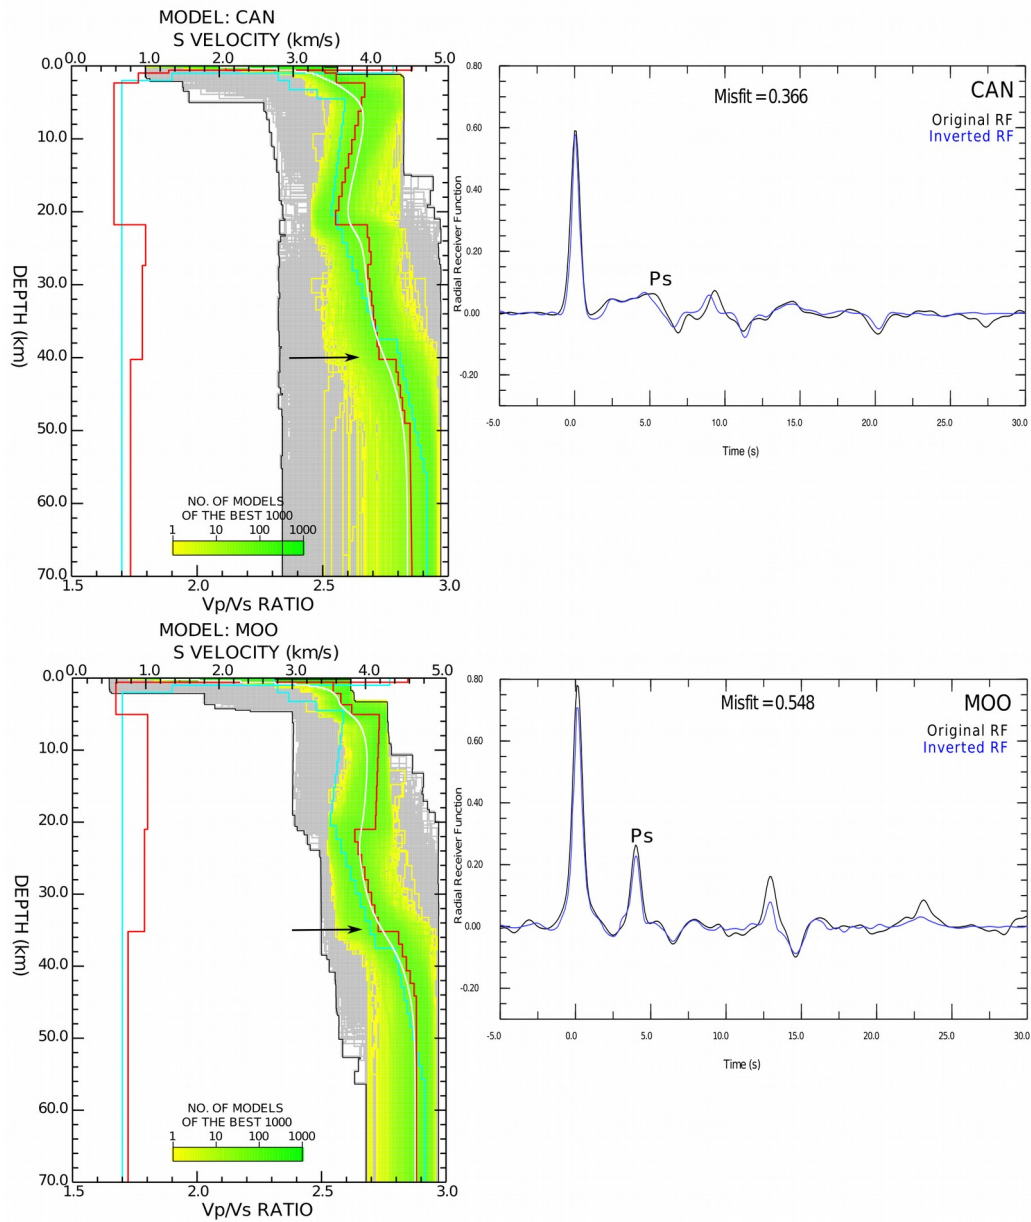

1008

Figure 7: (Left) Seismic velocity models for CAN and MOO stations obtained from the neighbourhood algorithm (Sambridge 1999a). The grey area indicates all the models searched by the algorithm. The best 1000 models are indicated by the yellow to green colours; the best one (smallest misfit) corresponds to the red line, both for  $S$ -wave velocity (top horizontal axis) and  $V_p/V_s$  ratio (bottom horizontal axis) and the white line is the average velocity model. (Right) Waveform matches between the observed stacked receiver functions (black) and predictions (blue) based on the best models. “Misfit” refers to the chi-square estimate as defined by Equation 2.

1015  
1016

1017  
1018

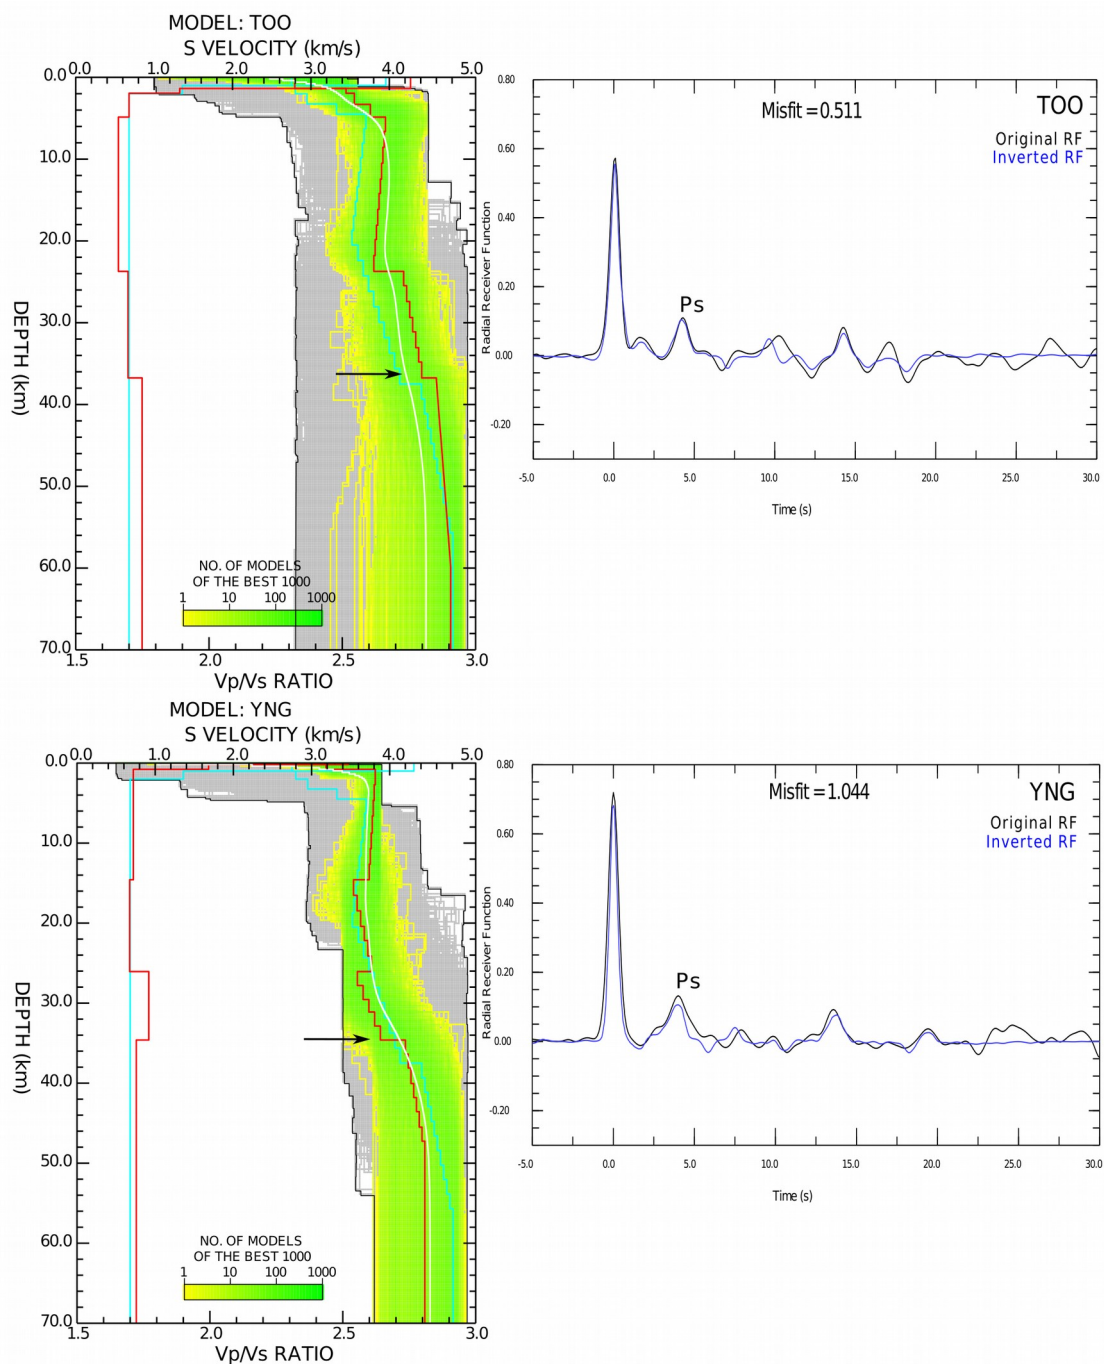

1019 **Figure 8: (Left) Seismic velocity models for stations TOO and YNG obtained from the neighbourhood algorithm.**  
 1020 **(Right) Comparison between the observed stacked and the predicted receiver functions from the NA inversion. See**  
 1021 **Figure 7 caption for more details.**

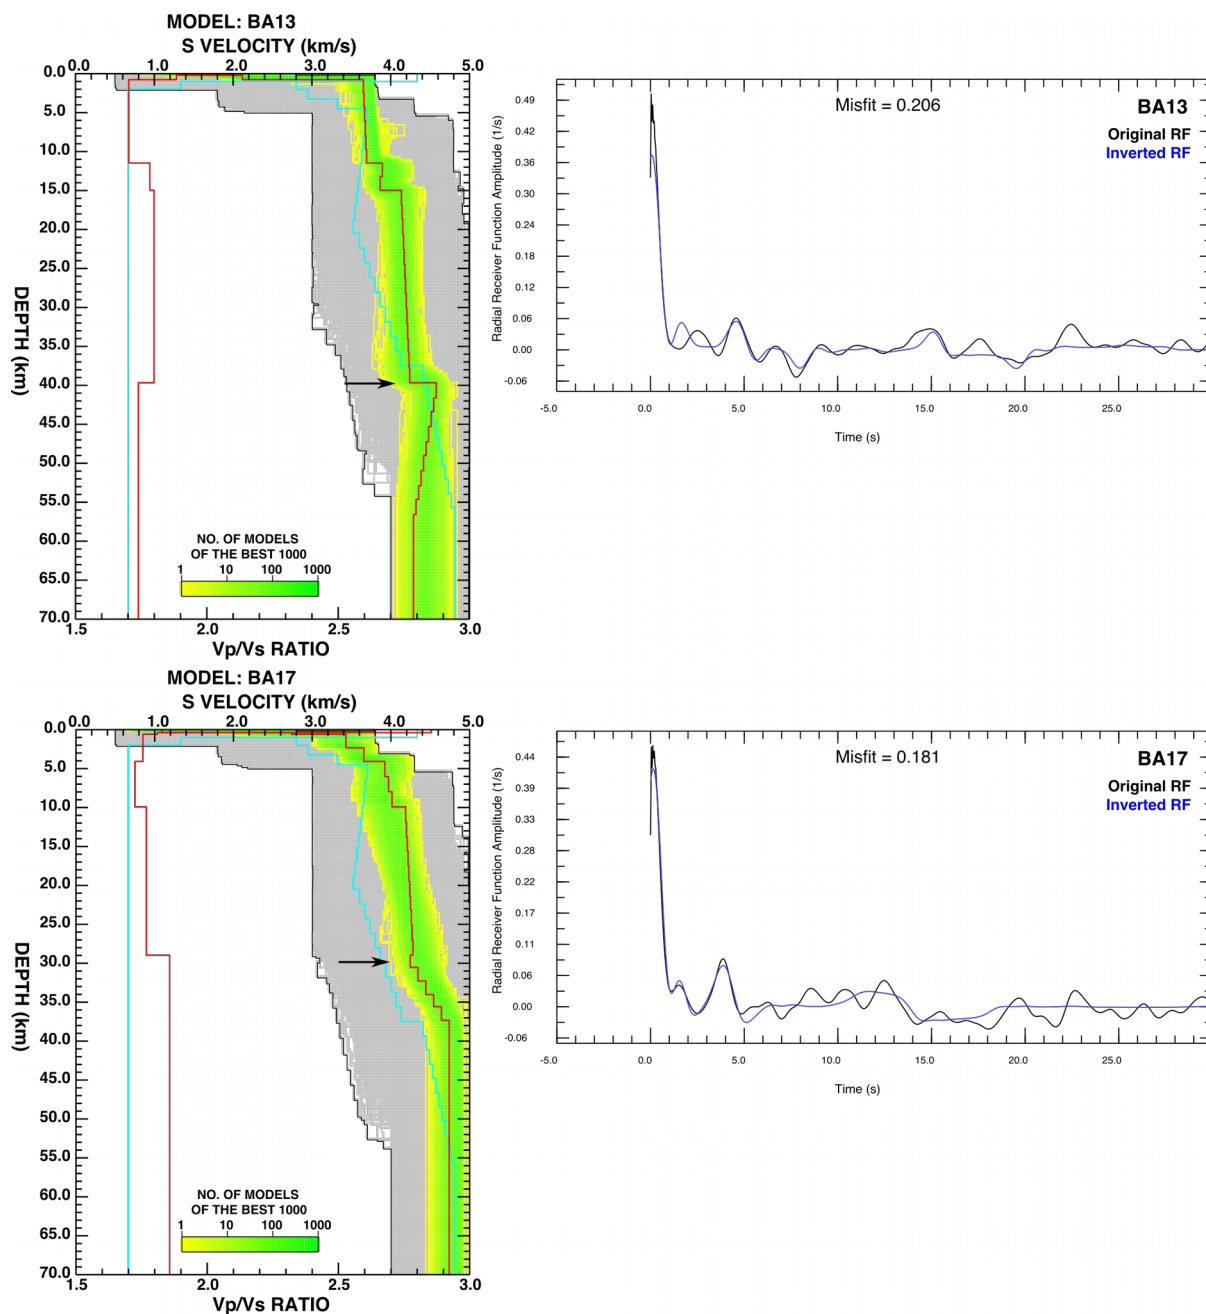

1024 [Figure 9: \(Left\) Seismic velocity models for temporary stations BA13 and BA17 obtained from the neighbourhood](#)  
 1025 [algorithm. \(Right\) Comparison between the observed stacked and the predicted receiver functions from the NA](#)  
 1026 [inversion. See Figure 7 caption for more details.](#)

1027  
1028  
1029  
1030  
1031

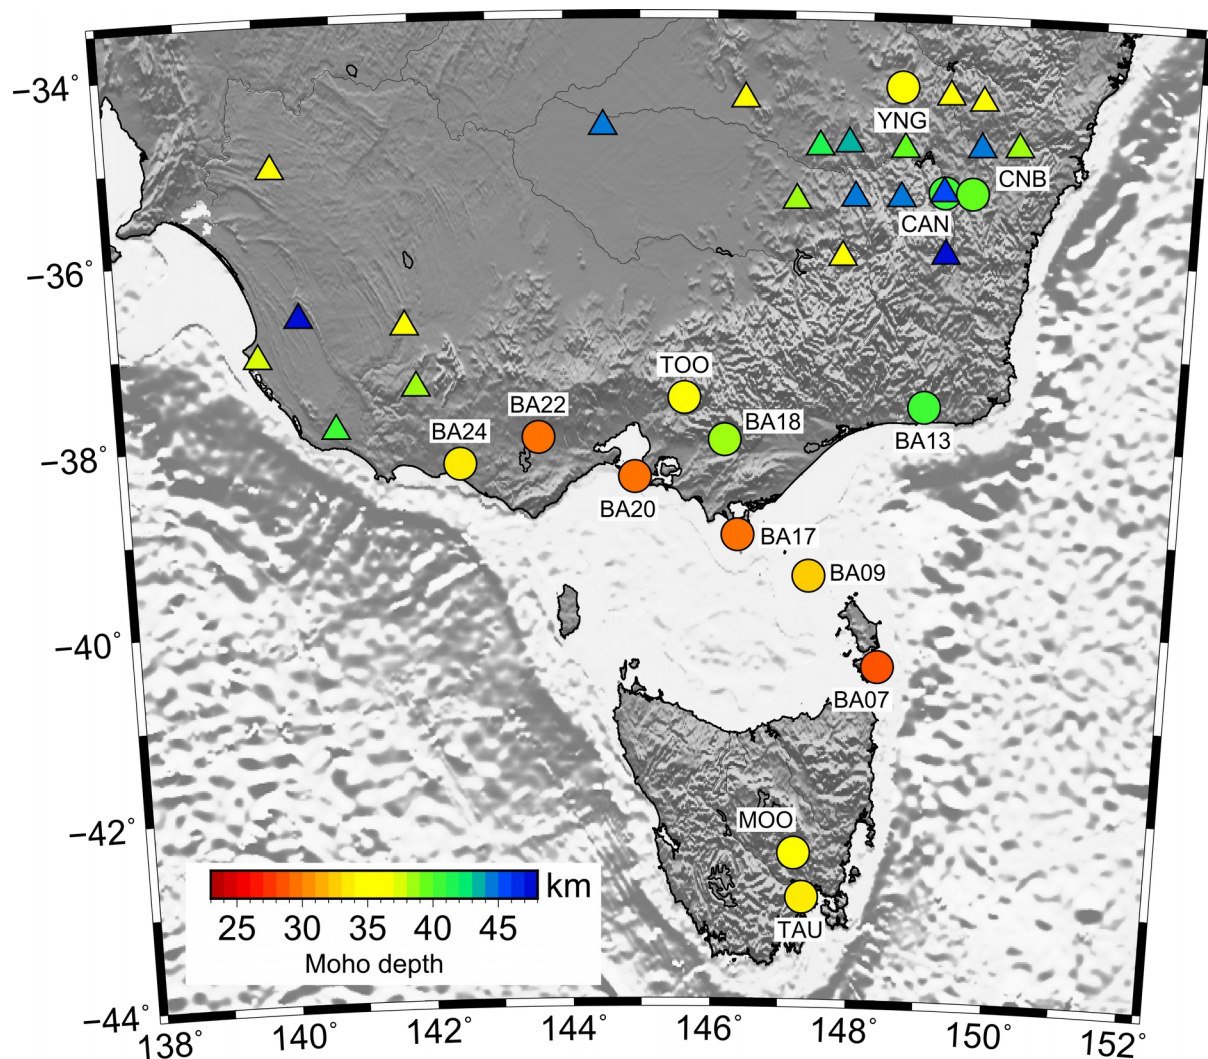

1033 Figure 109: (a) Map showing crustal thickness variations based on the S-wave velocity inversion results of this study  
1034 (stars) and previous studies (octagons) (Clitheroe et al., 2000; Fontaine et al., 2013a,b; Shibtani, 1996; Collins,  
1035 1991; Tkalcic et al., 2013), and (b) comparison of crustal thickness variations based on the  $H$ - $\kappa$  grid search results of  
1036 this study (stars) and previous results from the study of Tkalcic et al. (2012) (octagons). Topography/bathymetry is  
1037 based on the Etopo1 dataset (Amante and Eakins, 2009).

1038



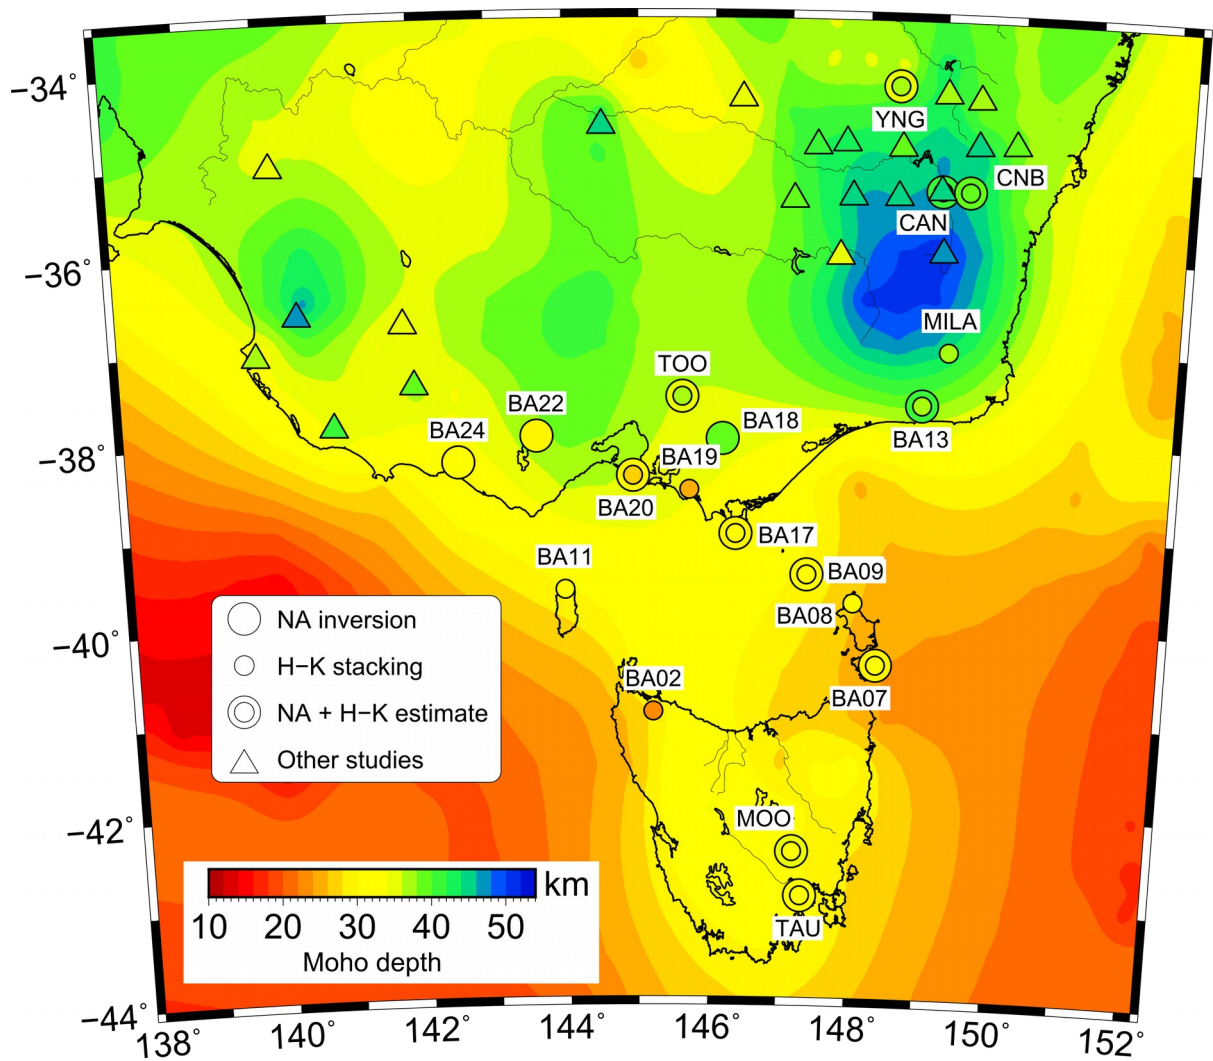

1041 [Figure 11: Comparison between the AusMoho model \(background colour map\) and Moho depths determined](#)  
1042 [through RF analysis in this and previous studies. Small coloured circles denote the Moho depths determined from](#)  
1043 [H- \$\kappa\$  stacking, whereas large coloured circles correspond to receiver function estimates. When both H- \$\kappa\$  and NA-](#)  
1044 [derived depths are available at a single station, the smaller H- \$\kappa\$  circle is superimposed on the larger NA circle, so that](#)  
1045 [both depths can be observed on the one plot. Moho depths determined from previous RF studies are denoted by](#)  
1046 [triangles.](#)

1047

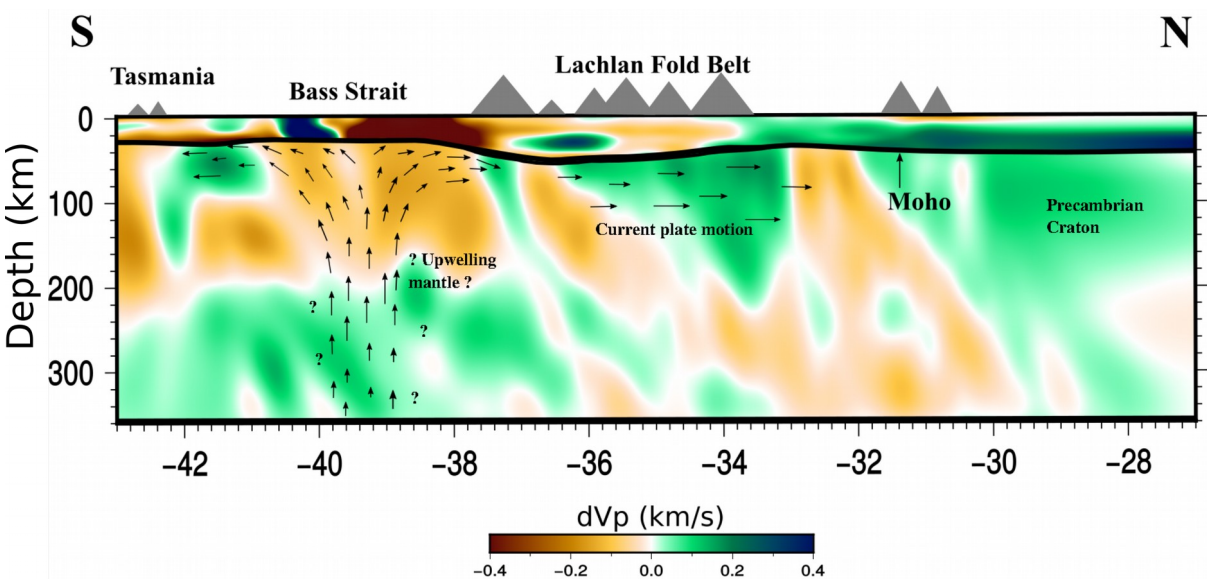

1050 [Figure 12: Composite result of teleseismic tomography \(mantle velocity anomalies\), ambient noise \(crustal velocity](#)  
1051 [anomalies\), receiver functions \(Moho\) and shear wave splitting \(inferred mantle flow relative to over-riding plate\).](#)  
1052 [Velocity slices are taken at 148°E.](#)

1053

1054

1055



# **Supplementary Information to “Crustal structure of southeast Australia from teleseismic receiver functions”**

Mohammed Bello<sup>1,2</sup>, David G. Cornwell<sup>1</sup>, Nicholas Rawlinson<sup>3</sup>, Anya M. Reading<sup>4</sup>, Othaniel K. Likkason<sup>2</sup>

<sup>1</sup>Department Geology & Geophysics, University of Aberdeen, Aberdeen, UK

<sup>2</sup>Department of Physics, Abubakar Tafawa Balewa University, Bauchi, Nigeria

<sup>3</sup>Department of Earth Sciences, University of Cambridge, UK

<sup>4</sup>School of Natural Sciences (Physics), University of Tasmania, Australia

*Correspondence to:* Mohammed Bello ([mbazare13@yahoo.com](mailto:mbazare13@yahoo.com))

## **Contents**

- Introduction
- H- $\kappa$  stacking analysis
- Figures S1-S4
- 1-D S-wave velocity inversion
- Figures S5-S9

## **Introduction**

This supplementary material presents H-  $\kappa$  stacks and 1-D NA inversion results that are not presented in the main text. It also includes a comparison of Moho depths beneath Tasmania.

## **H- $\kappa$ stacking analysis**

In this section, results from the H- $\kappa$  stacking analysis for RFs at stations listed in Table 2 of the main text are presented. In each case, one panel represents the normalised amplitudes of the stack over all back-azimuths along the travel time curves corresponding to the Ps and PpP s + PsPs phases. The other panel is the corresponding stacked receiver function for the station.

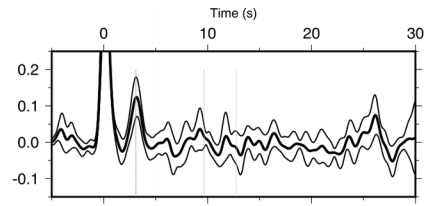

**BA02**

Stn = ba02,  $V_p = 6.5$ ,  $H = 23.2 \pm 5.0$ ,  $V_p/V_s = 1.83 \pm 0.31$

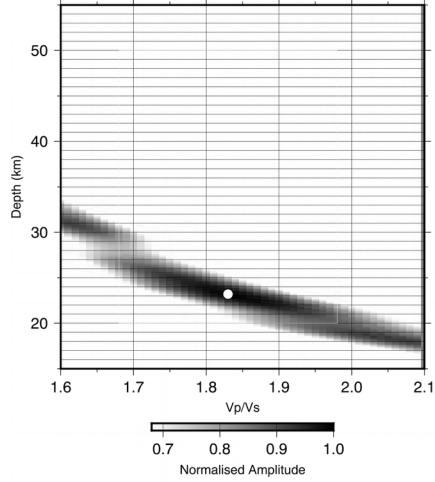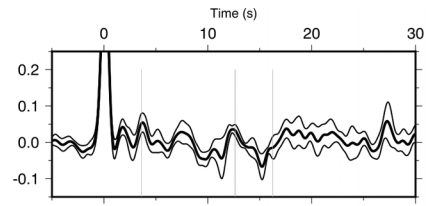

**BA08**

Stn = ba08,  $V_p = 6.5$ ,  $H = 31.9 \pm 1.6$ ,  $V_p/V_s = 1.70 \pm 0.07$

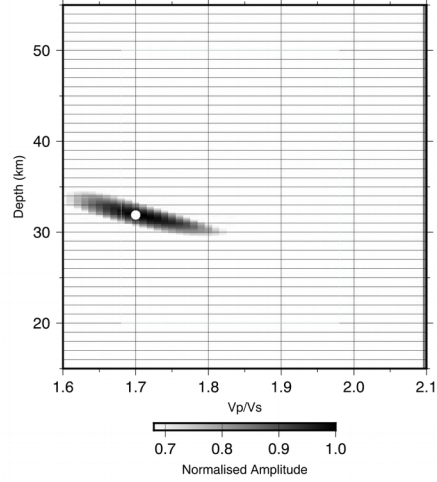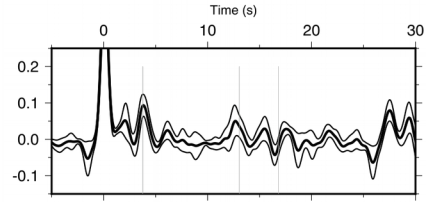

**BA09**

Stn = ba09,  $V_p = 6.5$ ,  $H = 32.8 \pm 1.7$ ,  $V_p/V_s = 1.71 \pm 0.07$

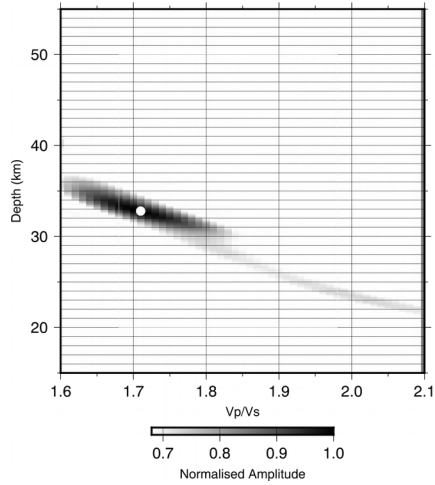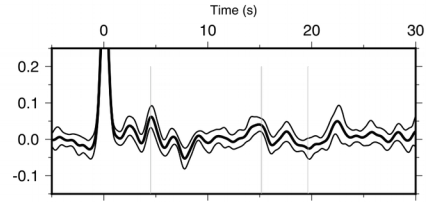

**BA13**

Stn = ba13,  $V_p = 6.5$ ,  $H = 37.7 \pm 2.9$ ,  $V_p/V_s = 1.74 \pm 0.10$

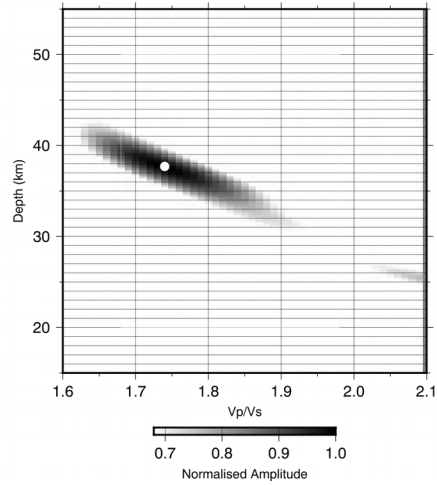

**Figure S1:** H- $\kappa$  stacking results for stations BA02, BA08, BA09 and BA13 from the temporary network.

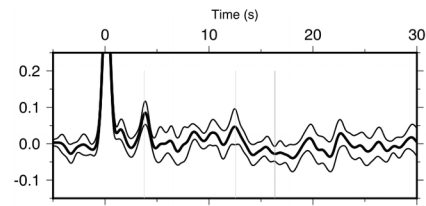

**BA17**

Stn = ba17,  $V_p = 6.5$ ,  $H = 30.9 \pm 2.5$ ,  $V_p/V_s = 1.76 \pm 0.10$

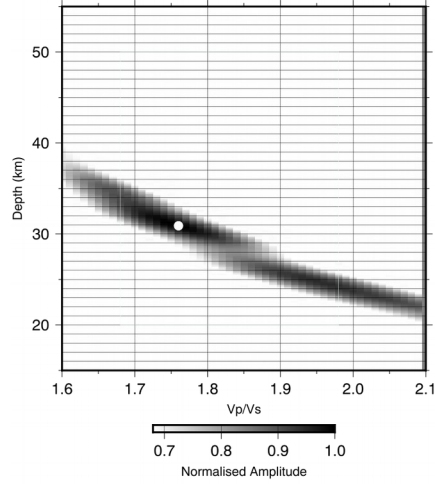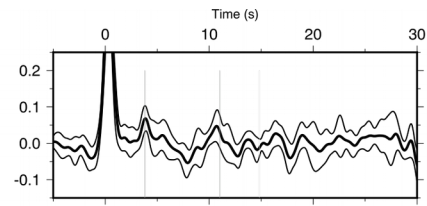

**BA19**

Stn = ba19,  $V_p = 6.5$ ,  $H = 25.5 \pm 2.4$ ,  $V_p/V_s = 1.93 \pm 0.14$

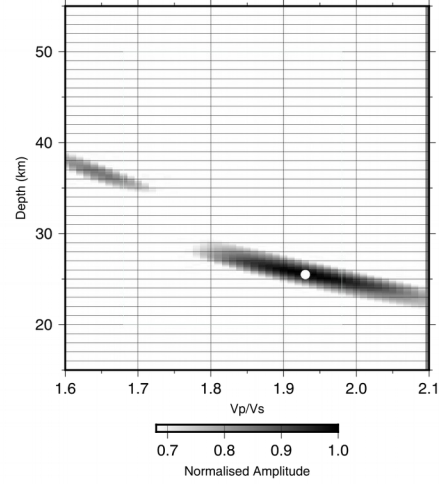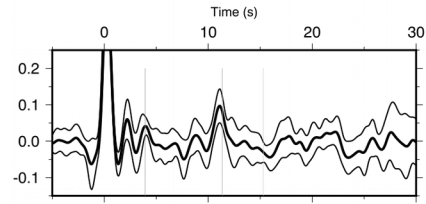

**BA20**

Stn = ba20,  $V_p = 6.5$ ,  $H = 26.3 \pm 1.6$ ,  $V_p/V_s = 1.93 \pm 0.12$

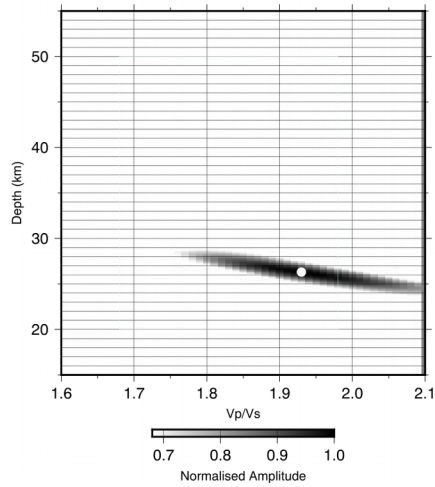

**Figure S2:** H- $\kappa$  stacking results for stations BA17, BA19 and BA20 from the temporary network.

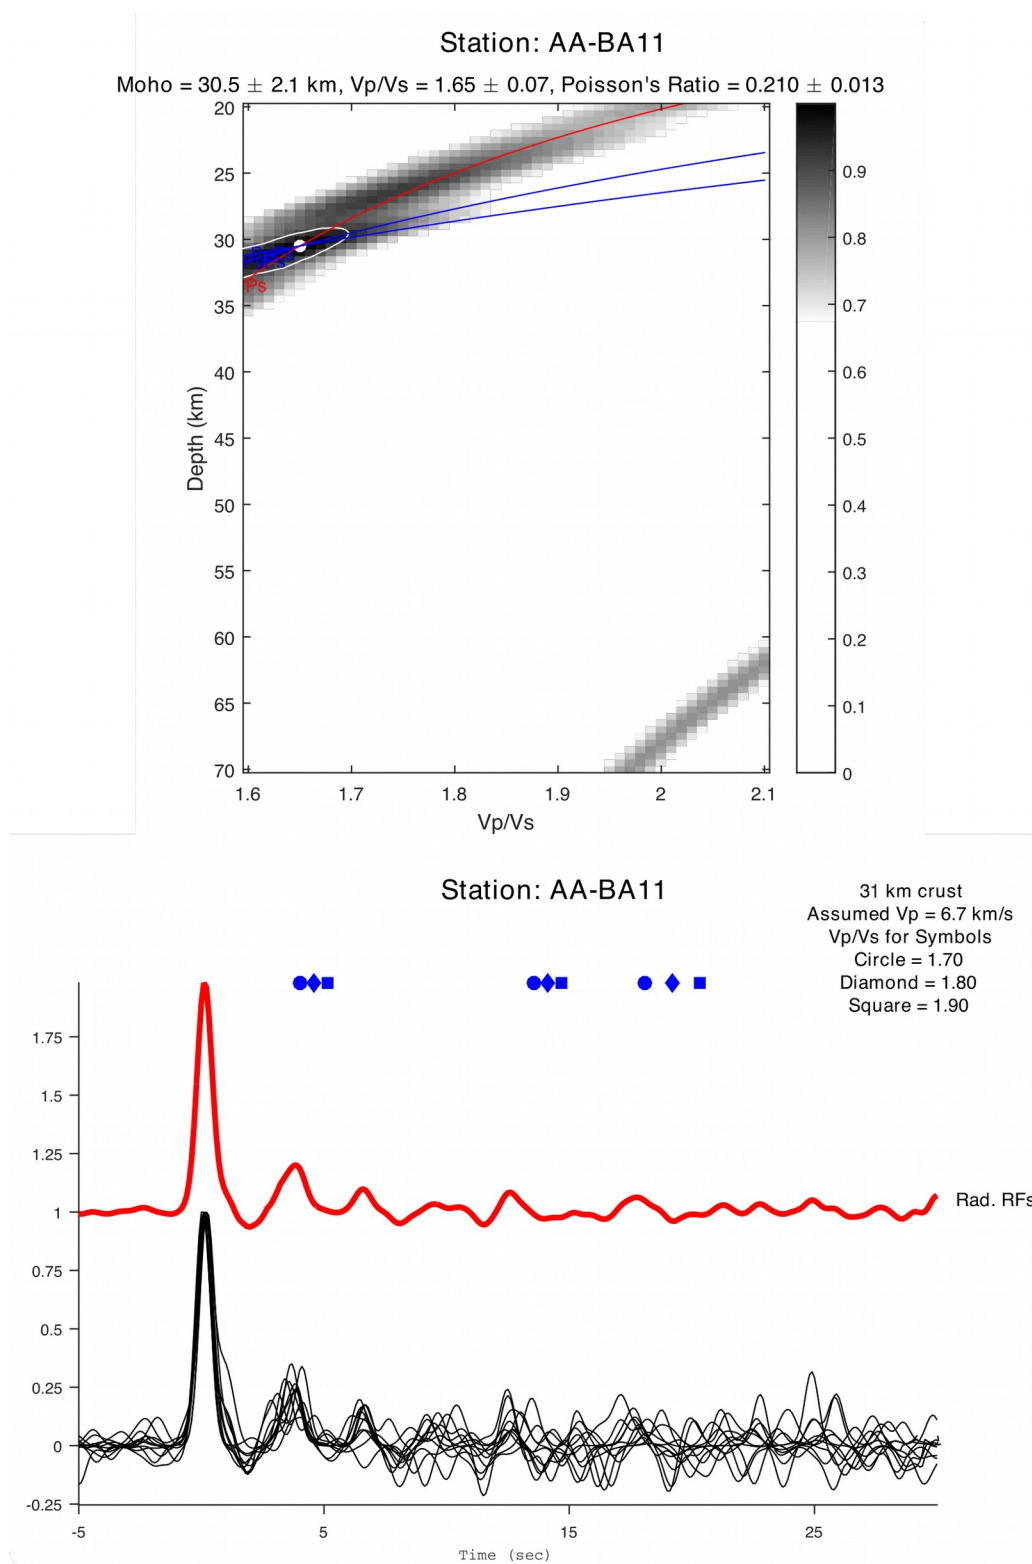

**Figure S3:** H- $\kappa$  stacking results for station BA11 from the temporary network.

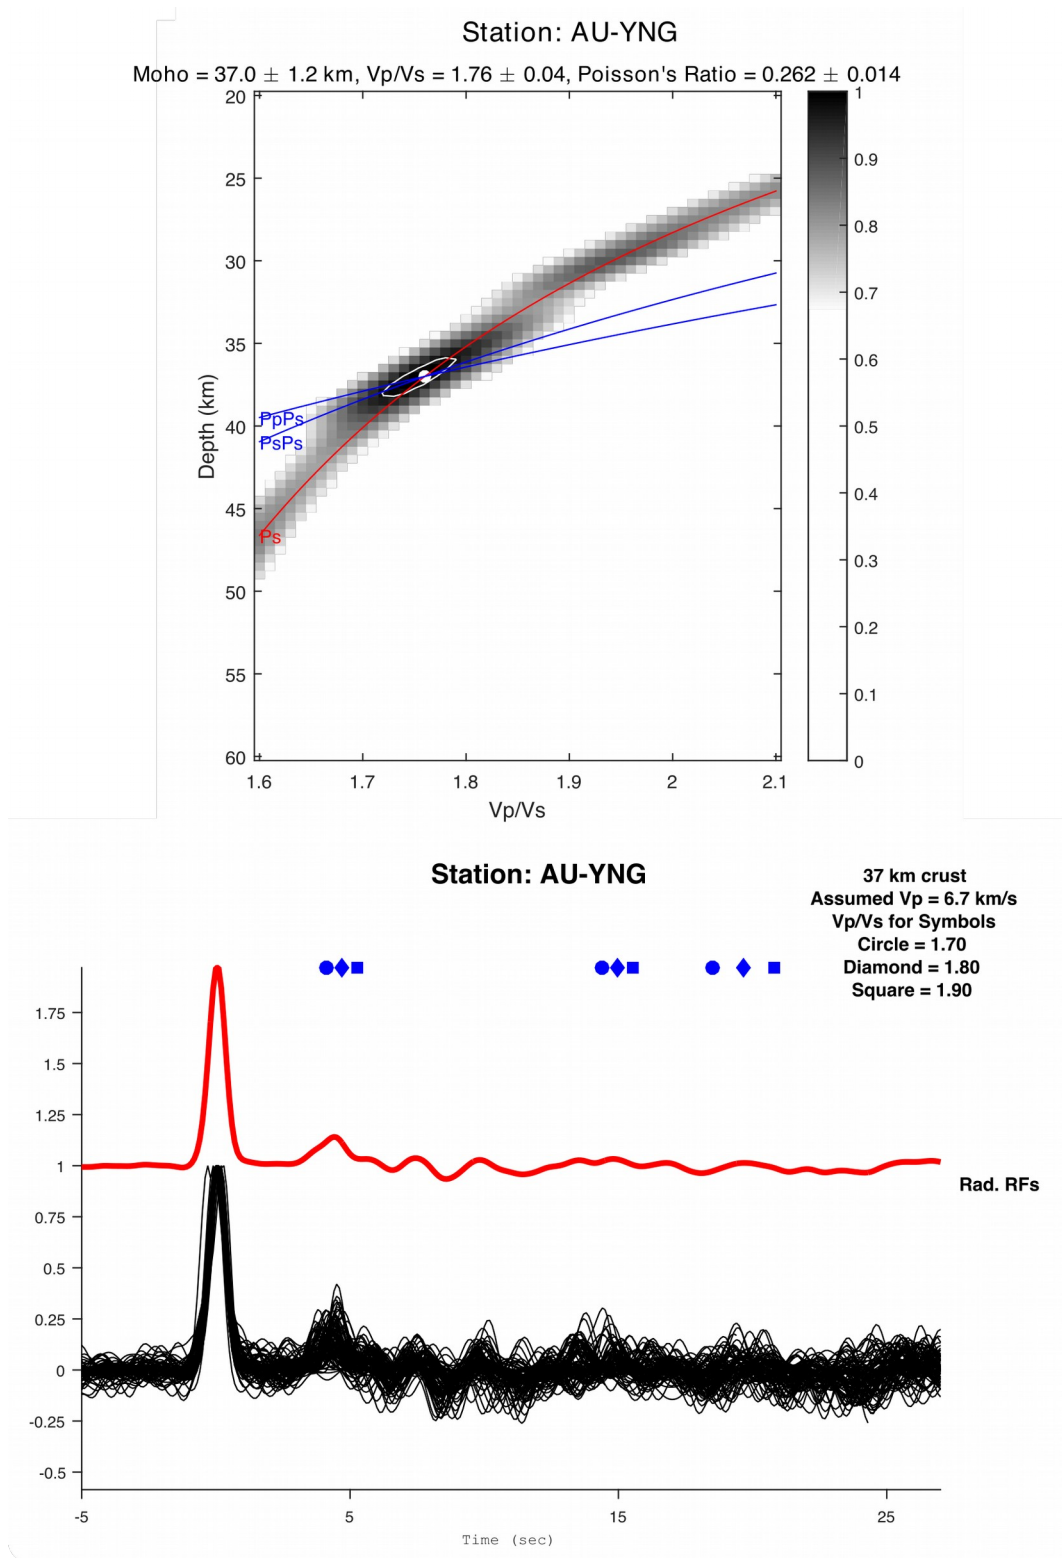

**Figure S4:** H- $\kappa$  stacking results for permanent station YNG.

### **1-D S-wave velocity inversion**

This section presents seismic S-wave velocity models for stations listed in Table 2, except those already shown in the main manuscript, obtained from receiver function inversion using the neighbourhood algorithm. The grey area indicates all the models searched by the algorithm. The best 1000 models are indicated in the yellow to green colour; the best model (smallest misfit) corresponds to the red line, both for S-wave velocity and  $V_p/V_s$  ratio, whereas the white line is the average velocity model computed from the best 1000 models. (Right) Waveform matches between the observed stacked receiver functions (black) and prediction (grey) based on the average of the best 1000 models.



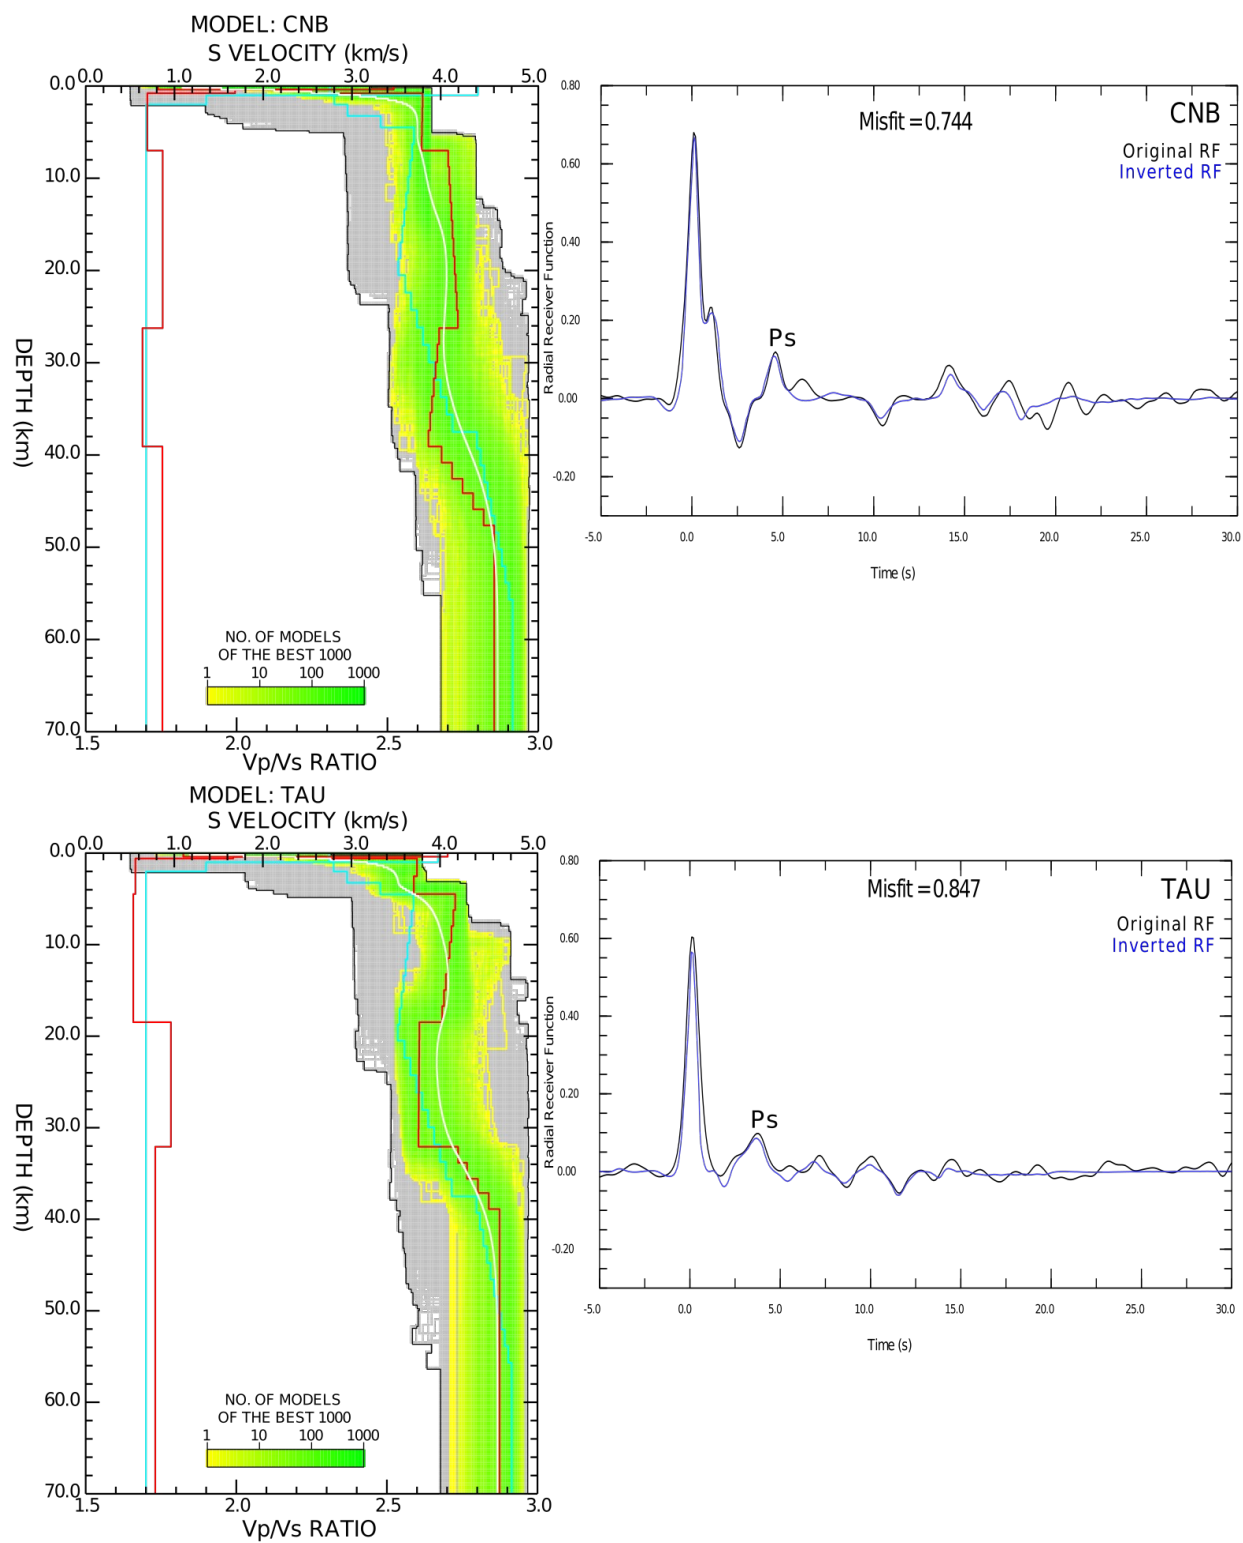

**Figure S5:** (Left) Density plot of S-wave velocity models and (right) observed and synthetic RF plots for stations CNB and TAU

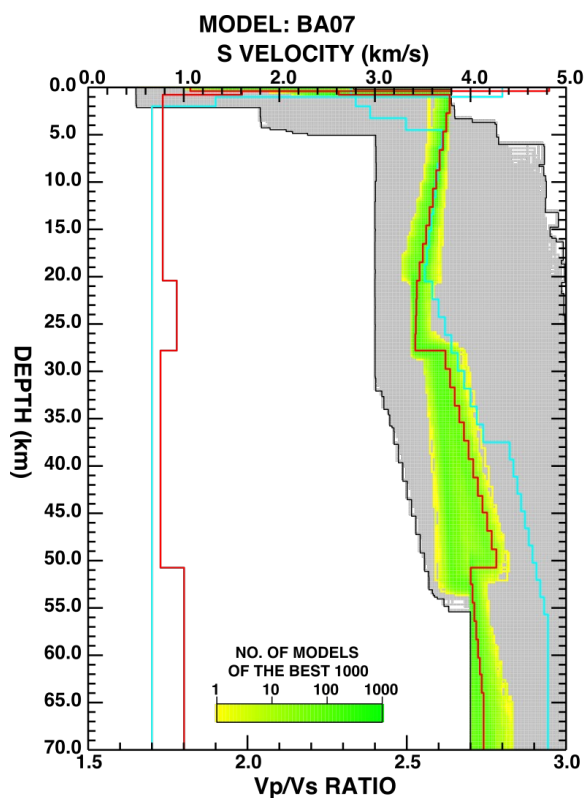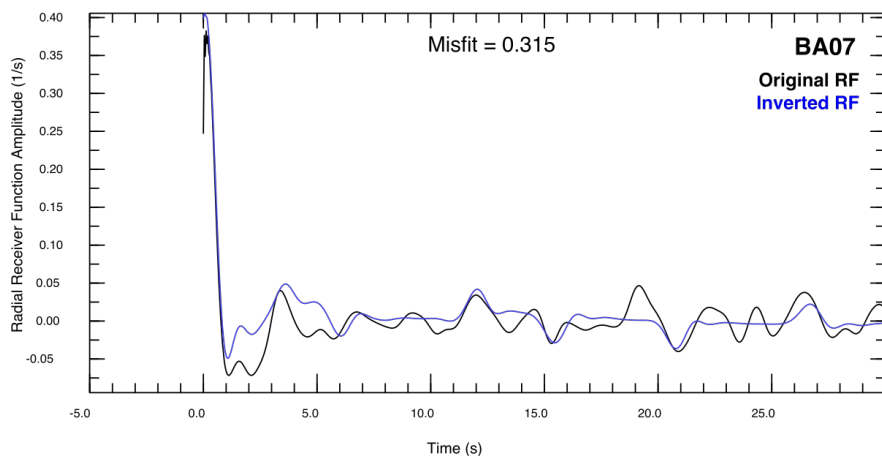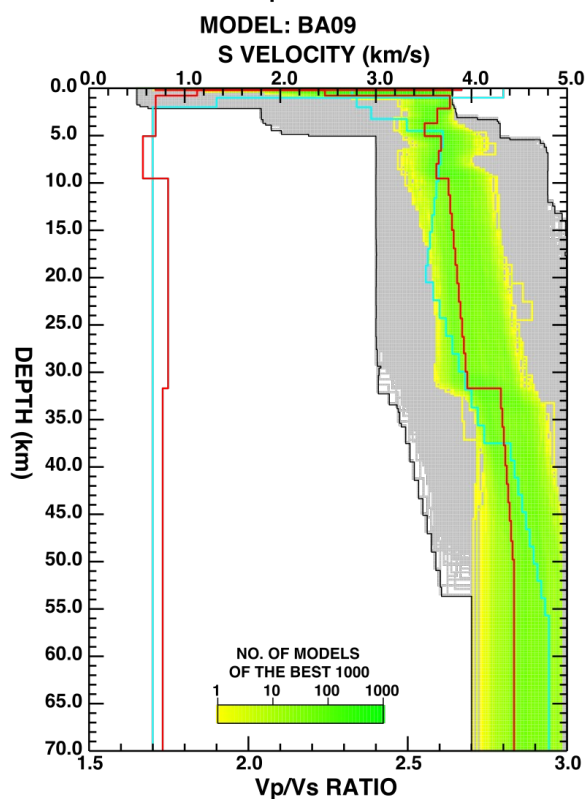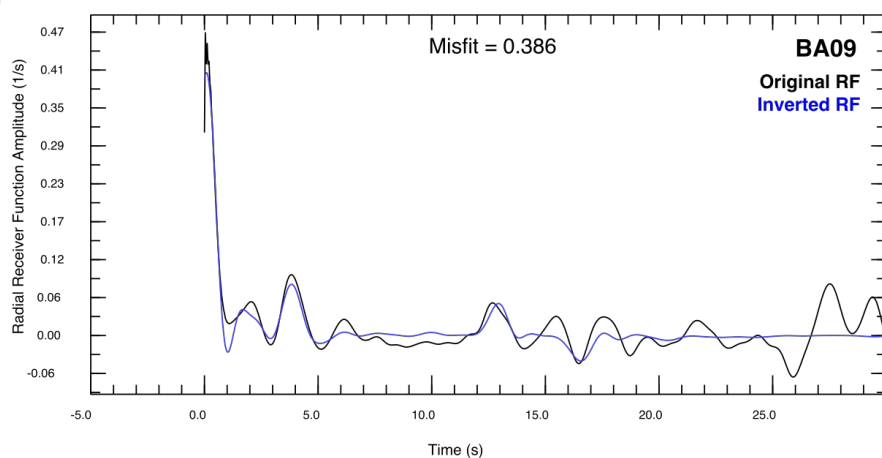

**Figure S6:** (Left) Density plot of S-wave velocity models and (right) observed and synthetic RF plots for stations BA07 and BA09.

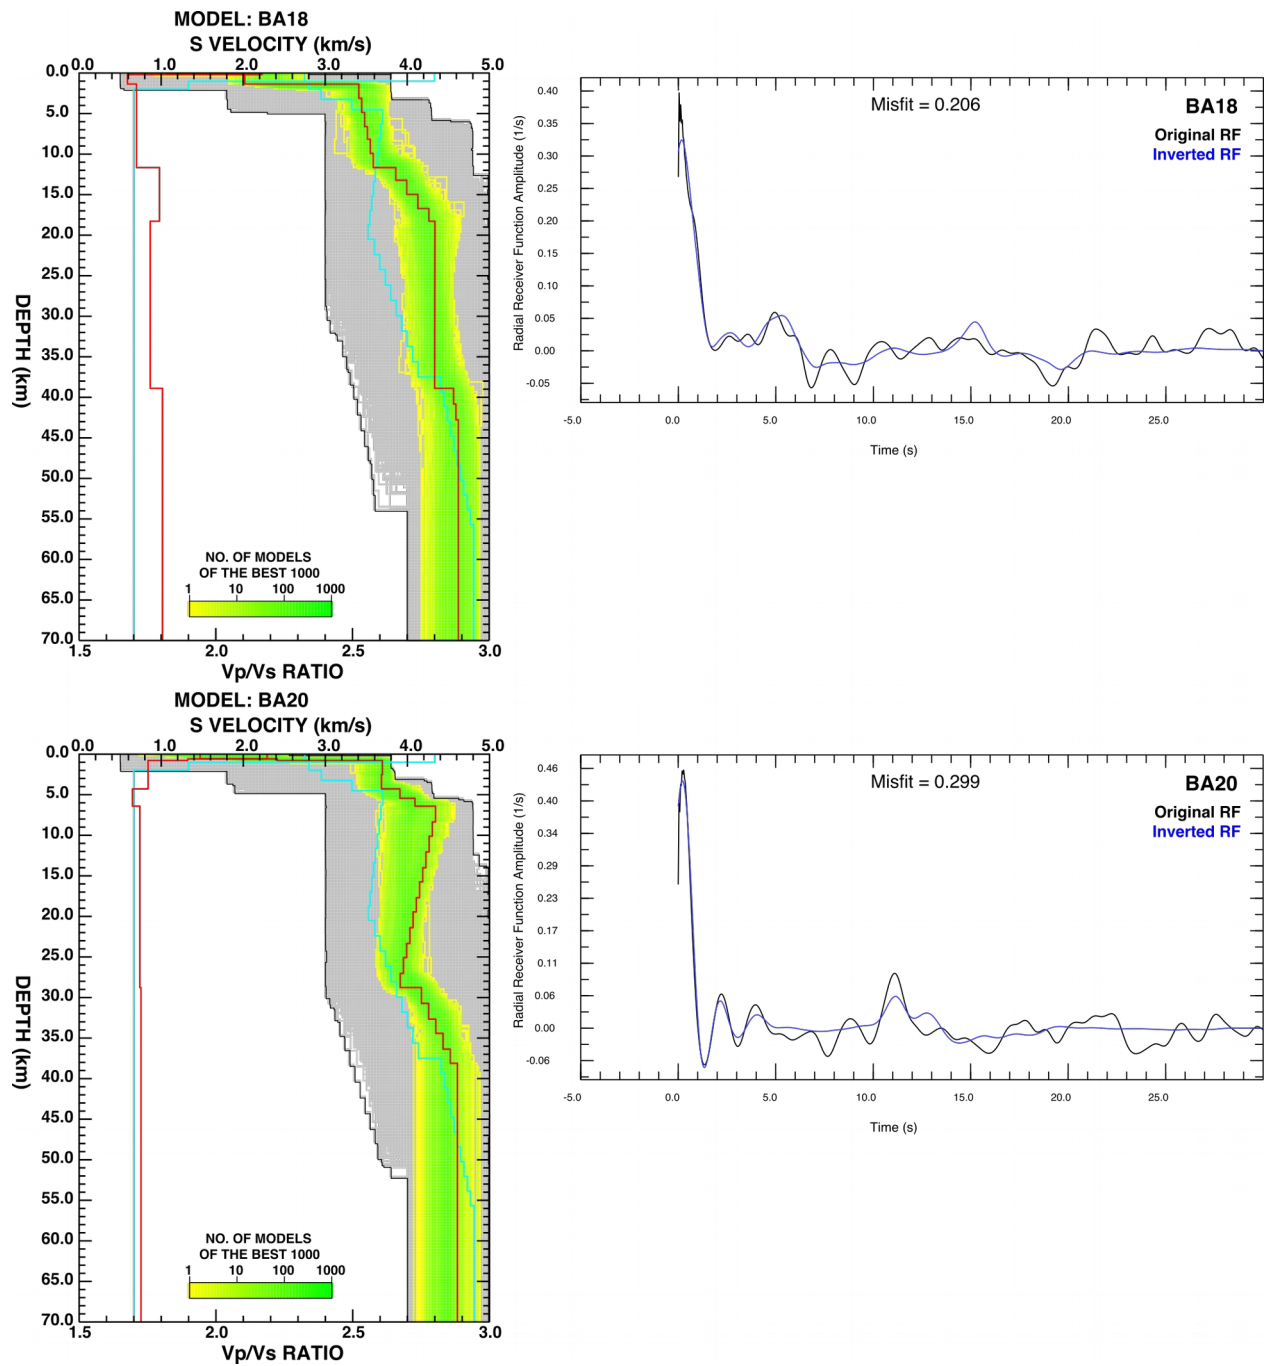

**Figure S7:** (Left) Density plot of S-wave velocity models and (right) observed and synthetic RF plots for stations BA18 and BA20.

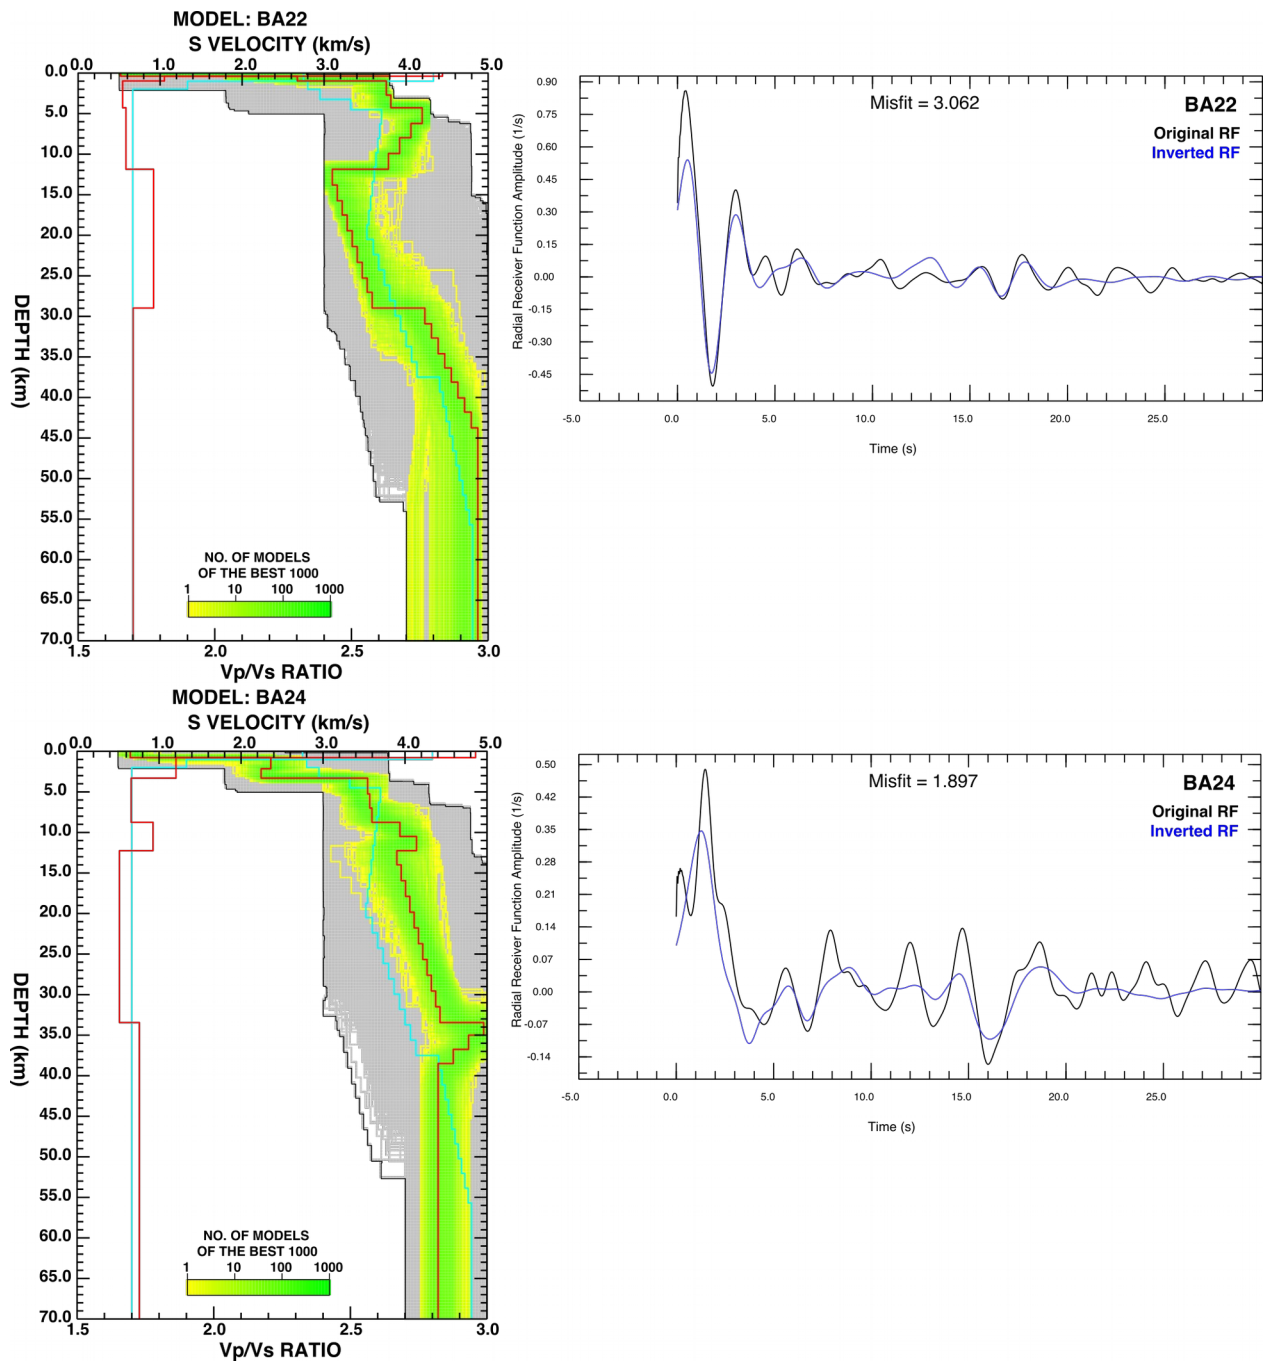

**Figure S8:** (Left) Density plot of S-wave velocity models and (right) observed and synthetic RF plots for stations BA07 and BA09.



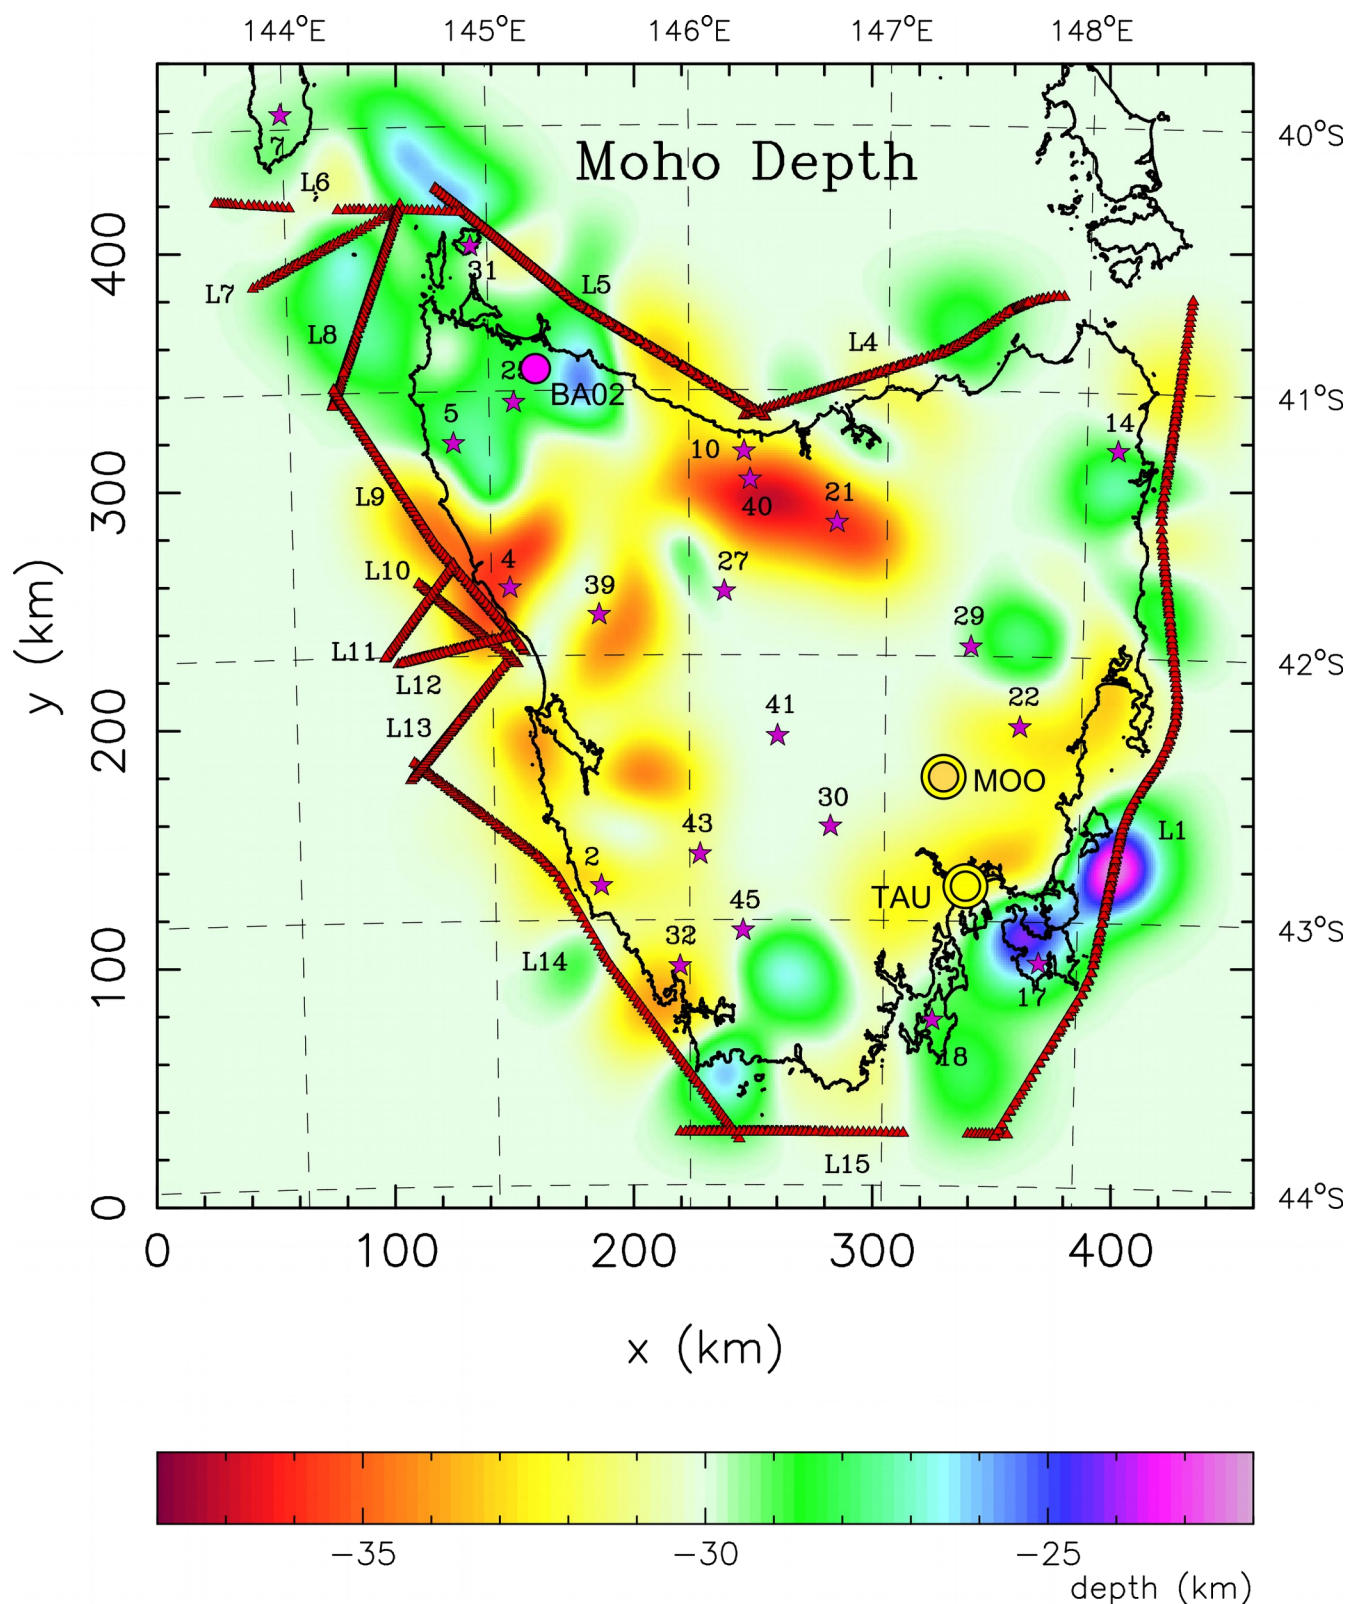

Supplement: Supplementary file [file se-2020-74-AC1-supplement.pdf]
