# Supplementary material for: Crustal structure of southeast Australia from teleseismicreceiver functions
Source: Copernicus journal article supplement (doi:10.5194/se-2020-74), 2020-07-08
Supplement: Supplementary file [file se-2020-74-RC2-supplement.pdf]

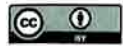

# Crustal structure of southeast Australia from teleseismic receiver functions

Mohammed Bello<sup>1,2</sup>, David G. Cornwell<sup>1</sup>, Nicholas Rawlinson<sup>3</sup>, Anya M. Reading<sup>4</sup>, Othaniel K. Likkason<sup>2</sup>

<sup>1</sup>Department Geology & Geophysics, University of Aberdeen, Aberdeen, UK

<sup>2</sup>Department of Physics, Abubakar Tafawa Balewa University, Bauchi, Nigeria

<sup>3</sup>Department of Earth Sciences, University of Cambridge, UK

<sup>4</sup>School of Natural Sciences (Physics), University of Tasmania, Australia

Correspondence to: Mohammed Bello (mbazare13@yahoo.com)

**Abstract.** In an effort to improve our understanding of southeast Australia's enigmatic tectonic evolution we analyse teleseismic earthquakes recorded by 24 temporary and 8 permanent broadband stations using the receiver function method. Crustal thickness, bulk seismic velocity and internal crustal structure of the southern Tasmanides – an assemblage of Palaeozoic accretionary orogens that occupy eastern Australia – are constrained by our new results which point to: (1) a  $39.0 \pm 0.5$  km thick crust, a relatively high Poisson's ratio ( $0.262 \pm 0.014$ ) and a broad ( $>10$  km) crust-mantle transition beneath the Lachlan Fold Belt. This is interpreted to represent magmatic underplating of mafic materials at the base of the crust; (2) a complex crustal structure beneath VanDieland, a ~~postulated~~ <sup>putative – or putatively</sup> Precambrian continental fragment embedded in the southernmost Tasmanides, where the crust thickens ( $37.5 \pm 1.2$  km) towards the northern tip of the microcontinent as it enters south central Victoria but thins south into Bass Strait ( $30.5 \pm 2.1$  km), before once again becoming thicker beneath western Tasmania ( $33.5 \pm 1.9$  km). The thinner crust beneath Bass Strait can be attributed to lithospheric stretching that resulted from the break-up of Antarctica and Australia and the opening of the Tasman Sea; (3) stations located in the East Tasmania Terrane and eastern Bass Strait (ETT+EB) collectively indicate crust of uniform thickness ( $\sim 33$  km) and a slightly broad Moho transition that reflect a possible underplating event associated with a Palaeozoic subduction system. The relative uniformity of  $V_p/V_s$  and Poisson's ratio in VanDieland – suggesting uniformity in composition – could be used in support of the VanDieland microcontinental model that explains the tectonic evolution of southeast Australia.

**Keywords:** receiver functions, crustal structure, VanDieland, Bass Strait, SE Australia

## 1 Introduction

The Phanerozoic Tasmanides (Collins and Vernon, 1994; Coney, 1995; Coney et al., 1990) comprise the eastern one-third of the Australian continent and through the process of subduction accretion were juxtaposed against the eastern flank of the Precambrian shield region of Australia beginning in the Late Neoproterozoic and Early Palaeozoic (Foster and Gray, 2000; Glen, 2005; Glen et al., 2009; Moresi et al., 2014) (Fig. 1). Persistent sources of debate that impede a more complete understanding of the geology of the Tasmanides include (1) the geological link between Tasmania – an island state in southeast Australia – and mainland Australia, which are separated by the waters of Bass Strait; and (2) the presence and locations of continental fragments from Rodinian remnants that are entrained within the accretionary orogens. Furthermore, the lateral boundaries between individual tectonic blocks and their crustal structure are often not well defined. To date, few constraints

→ this is a throwaway sentence. What are the tectonic questions? How does crustal thickness answer them?  
→ all of this? or just the crustal transition?

→ here too, we need to read in which way this "explains" the evolution, otherwise it is too vague.

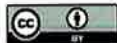

on crustal thickness and seismic velocity structure have been available for regions such as Bass Strait. Constraints on the Moho transition, crustal thickness and velocity structure beneath Bass Strait derived from receiver functions (RFs) can therefore provide fresh insight into the nature and evolution of the Tasmanides.

Previous estimates of crustal thickness and structure beneath southeastern Australia have been obtained from deep seismic reflection transects, wide-angle seismic data, topography and gravity anomalies (e.g. Collins, 1991; Collins et al., 2003; Drummond et al., 2006; Kennett et al., 2011). Earlier RF studies in southeast Australia (Shibutani et al., 1996; Clitheroe et al., 2000; Tkalčić et al., 2011; Fontaine et al., 2013a,b) suggested the presence of complex lateral velocity variations in the mid-lower crust that probably reflect the interaction of igneous underplating, associated thinning of the lithosphere, recent hotspot volcanism and uplift. Furthermore, the intermediate to high crustal  $V_p/V_s$  ratio of 1.70–1.78 in this region (Fontaine et al., 2013a), relative to ak135 continental crust where  $V_p/V_s$  is  $\sim 1.68$ , may indicate a mafic composition that includes mafic granulite rocks, granite-gneiss and biotite gneiss. Body- and surface-wave tomography (Fishwick and Rawlinson, 2012; Rawlinson et al., 2015) reveal  $P$  and  $S$  wave velocity anomalies in the uppermost mantle beneath Bass Strait and the Lachlan Fold Belt. Ambient noise surface wave tomography (Bodin et al., 2012b; Young et al., 2012; Pilia et al., 2015b, 2016; Crowder et al., 2019) of the southern Tasmanides reveals significant crustal complexity, but is unable to constrain crustal thickness or the nature of the Moho transition.

The goal of this paper is to provide fresh insight into the crust and Moho structure beneath the southern Tasmanides using  $P$ -wave RFs, explain the origin of the lateral heterogeneities that are observed and explore the geological relationship between the different tectonic units that constitute the southern Tasmanides, thereby facilitating a better grasp of the region's tectonic history.

## 2 Geological setting

The Palaeozoic-Mesozoic Tasmanides of eastern Australia form part of one of the most extensive accretionary orogens in existence and evolved from interaction between the East Gondwana margin and the Proto-Pacific Ocean. The tectonic evolution of the Tasmanides is complex and large-scale reconstructions have proven difficult. This is evident from the variety of models that have been suggested to explain how the region formed (Foster and Gray, 2000; Spaggiari et al., 2003; Teasdale et al., 2003; Spaggiari et al., 2004; Boger and Miller, 2004; Glen, 2005; Cawood, 2005; Glen et al., 2009; Cayley, 2011; Gibson et al., 2011; Moresi et al., 2014; Pilia et al., 2015a,b). Particular challenges arise from multiple subduction events, multiple phases of metamorphism, entrainment of exotic continental blocks, the formation of large oroclinal, recent intraplate volcanism and subsequent events, including the separation of Antarctica and Australia and the formation of the Tasman Sea. These challenges are compounded by the presence of widespread sedimentary sequences that hinder direct access to basement rocks (Fig. 1).

The Tasmanides consist of four orogenic belts, namely the Delamerian, Lachlan, Thomson and New England Orogens. The Delamerian Orogen - located in the south - is the oldest part of the Tasmanides and has a southward extension across Bass Strait from Victoria into western Tasmania, where it is commonly referred to as the Tyennan Orogen (Berry et al., 2008). Between about 514 and 490 Ma, the Precambrian and Early Cambrian rocks that constitute the Delamerian Orogen were subjected to contractional orogenic event along the

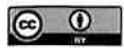

margin of East Gondwana (Foden et al., 2006). Subsequently, the Lachlan Orogen formed in the east, which contains rocks that vary in age from Ordovician to Carboniferous (Glen, 2005). Gray and Foster (2004) argued for a tectonic model for the Lachlan Orogen that involved interaction of a volcanic arc, oceanic microplates, several turbidite thrust systems and three distinct subduction zones. Each subduction zones is linked to the formation of distinct tectonic terrain: the Stawell-Bendigo zone, Tabbarebbera zone and Narooma accretionary complex. The limited rock exposure in the Tasmanides as a whole has made direct observation of the Lachlan Orogen difficult; this is attributed to a large swath of Mesozoic-Cenozoic sedimentary cover and more recent Quaternary volcanics which obscure a large portion of the underlying Palaeozoic terrane. However, the Lachlan Orogen contain belts of Cambrian rocks in Victoria and New South Wales that are similar in age to the Delamerian Orogen (Gray and Foster, 2004).

The presence of Precambrian outcrops in Tasmania and the relative lack of similar age rocks in adjacent mainland Australia has led to different models which attempted to explain the existence of Proterozoic Tasmania. For instance, Li et al. (1997) suggested that western Tasmania may be a remnant of a continental fragment set adrift by Rodinian break-up, whereas Calvert and Walter (2000) proposed that King Island, along with western Tasmania, rifted away from the Australian craton around ~600 Ma (Fig. 1). Other researchers have developed scenarios in which the island of Tasmania was present as a separate microcontinental block that was positioned outboard of the eastern margin of Gondwana before re-attaching at the commencement of the Palaeozoic (Berry et al., 2008).

A popular model that attempts to reconcile the geology observed in Tasmania and adjacent mainland Australia is that of Cayley (2011). This model proposes that central Victoria and western Tasmania formed a microcontinental block called “VanDieland” that fused with East Gondwana at the end of the Cambrian, possibly terminating the Delamerian Orogeny. VanDieland became entangled in the subduction-accretion system that built the Palaeozoic orogens that now comprise eastern Australia (Fig. 1). Delineating Precambrian continental fragments within southeast Australia has proven difficult partly due to more recent sedimentary cover that obscures large tracts of the Tasmanides. However, if present, they likely have distinctive structural and seismic velocity characteristics.

### 3 Previous geophysical studies

Imaging techniques previously employed to study crustal structure beneath the Tasmanides include: RF analysis (e.g. Shibutani et al., 1996; Clitheroe et al., 2000; Chevrot and van der Hilst, 2000; Kennett et al., 2011; Fontaine et al., 2013a,b), ambient noise tomography (e.g. Saygin and Kennett, 2010; Bodin et al., 2012b; Young et al., 2013a,b; Pilia et al., 2015a,b; Crowder et al., 2019), studies based on potential field imaging and numerical modelling (e.g. Gunn et al., 1997; Morse et al., 2009; Moresi et al., 2014; Moore et al., 2015, 2016), teleseismic tomography (Rawlinson and Urvoay, 2006; Rawlinson and Kennett, 2008; Rawlinson et al., 2015, 2016; Bello et al., 2019b) and seismic reflection and refraction profiling (e.g. Finlayson et al., 1980; Collins, 1991; Direen et al., 2001; Glen et al., 2002; Finlayson et al., 2002; Drummond et al., 2006; Cayley et al., 2011; Glen, 2013). The work of Clitheroe et al. (2000) used RFs to map broad-scale crustal thickness and Moho character across the Australian continent. These findings confirmed the previous work of Drummond and Collins (1986) and Collins (1991) who used seismic reflection and refraction transects to determine that the

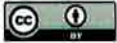

113 Lachlan Fold Belt has the thickest crust (~50 km) in eastern Australia. Shibutani et al. (1996) applied a genetic  
114 algorithm inversion, a non-linear global optimisation technique, to determine the lithospheric velocity structure  
115 of southeast Australia from teleseismic RFs. They found that the Moho is shallow (30-36 km) and sharp within  
116 the craton and deep (38-44 km) and transitional beneath the Tasmanides. They suggested that underplating or  
117 intrusion of mantle material may have thickened the crust and produced a less distinct contrast across the Moho.  
118 A more recent study by Fontaine et al. (2013a) employed  $H\kappa$  stacking and non-linear RF inversion to  
119 investigate crustal thickness, shear wave velocity structure, as well as dipping and anisotropy of the crustal  
120 layers. Their results also indicated a thick crust (~48 km) and an intermediate (2-9 km) crust-mantle transition  
121 beneath the Lachlan Fold Belt zone which could be attributed to underplating beneath the crust and/or high  
122 concentrations of mafic rocks in the mid-lower crust. Their results also showed a dipping Moho together with  
123 crustal anisotropy in the vicinity of three seismic stations (YNG, CNB and CAN). In our new work, we have a  
124 much increased data coverage of the study area (southern Tasmanides); this allows us to resolve new features,  
125 and further investigate the presence of structures that have been suggested by previous studies.

126 Over the last decade, ambient noise tomography has become popular tool for studying the structure of the  
127 Australian crust. Saygin and Kennett (2010) produced the first group velocity maps of the Australian continent  
128 from Rayleigh wave group velocity dispersion in the period range 5.0–12.5 seconds. Limited spatial resolution  
129 ( $\sim 2^\circ \times 2^\circ$ ) in our study region means that this model is only able to represent the structure beneath Bass Strait  
130 as a broad, low velocity anomaly. However, the group velocities exhibit a good correlation with known basins  
131 and cratons. Subsequent studies using denser arrays covering southeast mainland Australia (Arroucau et al.,  
132 2010) and northern Tasmania (Young et al., 2011) show good correlations between group/phase velocity maps  
133 and sedimentary and basement terrane boundaries. In order to account for uneven data distribution, Bodin et al.  
134 (2012b) used a Bayesian transdimensional inversion scheme to generate group velocity maps that span the  
135 Australian continent from multi-scale ambient noise datasets. However, in our study area their model is of low  
136 resolution due to the limited station coverage and hence few details on crustal structure can be inferred. Bodin et  
137 al. (2012a) subsequently applied Bayesian statistics to reconstruct the Moho depth of Australia using a variety  
138 of seismic datasets, which gave an approximate Moho depth of ~30 km beneath Bass Strait.

139 Potential field data have also been exploited to study the formation and structure of the Tasmanides. Gunn et al.  
140 (1997) integrated potential field data (magnetic and gravity), seismic reflection data, outcrop geology and well  
141 information to study the crustal structure of the Australian continent. Their study found that the occurrence of  
142 tensional stress oriented NE-SW along basement structures in the Bass Basin is able to explain the formation of  
143 the three major sedimentary basins that overlie dense mafic material, which in turn was formed by mantle  
144 decompression processes associated with crustal stretching. From the interpretation of new aeromagnetic data,  
145 Morse et al. (2009) delineated the architecture of the Bass Strait basins and their supporting basement structure.  
146 Subsequent studies by Moore et al. (2015, 2016) used gravity, magnetic, seismic reflection and outcrop data to  
147 support the hypothesis of a VanDieland microcontinent. Their study showed that VanDieland comprises seven  
148 distinct microcontinental ribbon terranes that appear to have amalgamated by the Late Cambrian with major  
149 faults and suture zones bonding these ribbon terranes together.

150 While the last few decades <sup>Q</sup>has seen important advances and insights made into our understanding of the



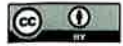

151 southern Tasmanides, there still remains limited data on the deep crustal structure beneath Bass Strait, which is  
152 our region of interest. It is therefore timely that we can exploit, using the RF technique, teleseismic data recorded  
153 by a collection of temporary and permanent seismic stations in the region to study the structure of the crust,  
154 Moho and uppermost mantle beneath mainland Australia, Bass Strait and Tasmania.

#### 155 4 Data

156 A collaboration involving five organisations (University of Tasmania, Australian National University, Mineral  
157 Resources Tasmania, the Geological Survey of Victoria and FROGTECH) deployed the temporary Bass seismic  
158 array from May 2011 to April 2013. It consisted of 24 broadband, three-component seismic stations that  
159 spanned northern Tasmania, a selection of islands in Bass Strait and southern Victoria. The instruments used  
160 were 23 Guralp 40T and one Guralp 3ESP sensors coupled to Earth Data PR6-24 data loggers. The permanent  
161 stations consist of eight broadband sensors managed by IRIS, GEOSCOPE and the Australian National Seismic  
162 Network (ANSN). The distribution of all 32 seismic stations that are used in this study is plotted in Fig. 2.

163 Earthquakes with magnitudes  $m_b > 5.5$  at epicentral distances between  $30^\circ$  and  $90^\circ$  comprise the seismic  
164 sources used in this analysis (Fig. 3). This resulted in an acceptable azimuthal coverage of earthquakes between  
165 the northwest and east of the array, where active convergence of the Australian and Eurasian plate coupled with  
166 westward motion of the Pacific plate has produced extensive subduction zones. To the south and southwest of  
167 the array, the absence of subduction zones in the required epicentral distance range means that there are  
168 significantly fewer events available for analysis from these regions.

#### 169 5 Methods

##### 170 5.1 Receiver functions

171 The RF technique (Langston, 1979) uses earthquakes at teleseismic distances to enable estimation of Moho  
172 depth and shear wave velocity structure in the neighbourhood of a seismic recorder. If this technique can be  
173 applied to a network of stations with good spatial coverage, it represents an effective way of mapping lateral  
174 variations in Moho depth and crustal structure. The coverage and quality of broadband data available for this  
175 study provides a sound basis on which to examine the crustal structure of the southern Tasmanides.

176 A recorded teleseismic wavefield at a broadband station can be described by the convolutional model in which  
177 operators that represent the source radiation pattern, path effects, crustal structure below the station and  
178 instrument response are combined to describe the recorded waveform. By using deconvolution to remove the  
179 effects of the source, path and response of the instrument (e.g. Langston, 1979), information on local crustal  
180 structure beneath the station can be extracted from  $P$  - to  $S$  -wave conversions at discontinuities in seismic  
181 velocity (Owens et al., 1987; Ammon, 1991).

182  $P$ -wave RFs were determined from teleseismic  $P$ -waveforms using FuncLab software (Eagar and Fouch, 2012;  
183 Porritt and Miller, 2018), following preprocessing using the seismic analysis code (SAC) (Goldstein et al.,  
184 2003). The complete set of 1765 events (Fig. 3) and 32 stations produced 21,671 preliminary RFs. These RFs  
185 were manually picked using the FuncLab trace editor, and by using the clarity of the direct arrivals as an  
186 acceptance criteria, a total of 9,674 RFs were retained for further analysis. The RFs were computed using an

6

was

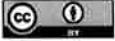

iterative time-domain deconvolution scheme developed by Ligorria and Ammon, 1999 with a 2.5 s Gaussian filter width. This is performed by deconvolution of the vertical component waveform from the radial and transverse waveforms with a central frequency of 1 Hz. This frequency was selected on account of significant source energy detected in the 1 Hz range of teleseismic  $P$  arrivals, which are sensitive to crustal-scale anomalies. It also provides a favourable lateral sensitivity with respect to Fresnel zone width ( $\sim 15$  km at Moho depth) when the conversions from  $P$  to  $S$  are mapped as velocity and crustal thickness variations.

## 5.2 $H$ - $\kappa$ stacking

Having obtained reliable  $P$ -wave RFs, the  $H$ - $\kappa$  stacking technique is used to estimate crustal thickness, Poisson's ratio and bulk  $V_P/V_S$ . We apply the method of Zhu and Kanamori (2000) to stations where the direct  $P_S$  (Moho  $P$ -to- $S$  conversion) and its multiples are observed. This technique makes use of a grid search to determine the crustal thickness ( $H$ ) and  $V_P/V_S$  ( $\kappa$ ) values that correspond to the peak amplitude of the stacked phases. A clear maximum requires a contribution from both the primary phase ( $P_S$ ) and the associated multiples ( $P_P P_S$  and  $P_P S_S + P_S P_S$ ). In the absence of multiples, the maximum becomes smeared out due to the inherent trade-off between crustal thickness ( $H$ ) and average crustal velocity properties ( $\kappa$ ) (Ammon et al., 1990; Zhu and Kanamori, 2000). The  $H$ - $\kappa$  stacking algorithm reduces the aforementioned ambiguity by summing RF amplitudes for  $P_S$  and its multiples  $P_P P_S$  and  $P_P S_S + P_S P_S$  at arrival times corresponding to a range of  $H$  and  $V_P/V_S$  values. In the  $H$ - $\kappa$  domain the equation for stacking amplitude

$$s(H, \kappa) = \sum_{j=1}^N w_1 r_j(t_1) + w_2 r_j(t_2) - w_3 r_j(t_3) \quad (1)$$

where  $r_j(t_i)$ ;  $i = 1, 2, 3$  are the RF amplitude values at the expected arrival times  $t_1$ ,  $t_2$ , and  $t_3$  of the  $P_S$ ,  $P_P P_S$ ,  $P_P S_S + P_S P_S$  phases respectively for the  $j^{\text{th}}$  RF.  $w_1, w_2, w_3$  are weights based on the signal to noise ratio ( $w_1 + w_2 + w_3 = 1$ ), and  $N$  is the total number of radial RFs for the station.  $s(H, \kappa)$  achieves its maximum value when all three phases stack constructively, thereby producing estimates for  $H$  and  $V_P/V_S$  beneath the station. In this study, the weighting factors used are  $w_1 = 0.6$ ,  $w_2 = 0.3$  and  $w_3 = 0.1$  (Zhu and Kanamori, 2000). The  $H$ - $\kappa$  approach requires an estimate of the mean crustal  $P$ -wave velocity, which is used as an initial value. Based on the results of a previous seismic refraction study (Drummond and Collins, 1986), we use an average crustal velocity of  $V_P = 6.65$  km/s to obtain our estimates of  $H$  and  $\kappa$  in the study area, noting that  $H$ - $\kappa$  stacking results are much more dependent on  $V_P/V_S$  than  $V_P$  (Zhu and Kanamori, 2000). To estimate the uncertainties in the  $H$ - $\kappa$  stacking results, we compute the standard deviation of the  $H$  and  $\kappa$  values at each station.

$H$ - $\kappa$  stacking can also be used to determine Poisson's ratio, which is a useful parameter for inferring the physical and compositional properties of the crust (Christensen, 1996) and providing insight into fractures, fluids, and partial melt (e.g. Mavko, 1980). The Poisson's ratio  $\sigma$  can be determined from  $\kappa$  using the equation

$$\sigma = \frac{1}{2} \left( 1 - \frac{1}{\kappa^2 - 1} \right) \quad (2)$$

where  $\kappa = V_P/V_S$ . While simple to implement, the Zhu and Kanamori (2000) method can suffer from large

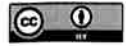

uncertainties due to its assumption of a simple flat-laying layer over half-space with constant crustal and upper mantle properties. Consequently, there are only two search parameters ( $H$  and  $\kappa$ ) plus *a priori* information ( $V_p$ , weightings) and it does not account for variation with backazimuth. These problems can cause non-unique and inaccurate estimates, which can lead to potentially misleading interpretations; for instance a low velocity upper crustal layer can appear as a very shallow Moho in an  $H$ - $\kappa$  stacking search space diagram. Also, a dipping Moho and/or anisotropic layers within the crust can contribute to uncertainty.

### 5.3 Nonlinear waveform inversion

In an effort to refine the crustal model, we invert a stack of the radial RFs by adopting the workflow described by Shibutani et al. (1996). We divide the waveform data (RFs) into four  $90^\circ$  quadrants based on the backazimuth of their incoming energy. The 1<sup>st</sup> quadrant backazimuth range is from  $0^\circ$  and  $90^\circ$ , and an equivalent range in a clockwise direction defines the consecutive quadrants. The 2<sup>nd</sup> and 3<sup>rd</sup> quadrants (south-eastern and south-western backazimuths) have very small numbers of RFs. Data from the 1<sup>st</sup> and 4<sup>th</sup> quadrants are of better quality, with the 1<sup>st</sup> quadrant showing more coherency than the 4<sup>th</sup> quadrant, which is likely due to the orientation of surrounding tectonic plate boundaries and hence the pattern of  $P$ -wave energy radiated towards Australia. Kennett and Furumura (2008) showed that seismic waves arriving in Australia from the northern azimuths undergo multiple scattering but low intrinsic attenuation due to heterogeneity in the lower crust and mantle; this tends to produce prolonged high-frequency coda. An important assumption in our inversion is that we neglect anisotropy and possible Moho dip, which we assume have a second order influence on the waveforms we use to constrain 1-D models of the crust and upper mantle.

Visual examination of coherency in  $P$  to  $S$  conversions allows us to select a subset of RF waveforms for subsequent stacking. This resulted in groups of mutually coherent waveforms after which a moveout correction is then applied to remove the kinematic effect of different earthquake distances prior to stacking using a cross-correlation matrix approach described in Chen et al. (2010) and Tkalčić et al. (2011). Our strict criteria give reliable RFs at only 6 out of the 32 stations used for this study. An example of some stacked RFs is given in Fig. 4.

#### 5.3.1 Neighborhood algorithm

We invert RFs for 1-D seismic velocity structure beneath selected seismic stations using the Neighbourhood Algorithm or NA (Sambridge, 1999a,b) in order to better understand the internal structure of the crust and the nature of the transition to the upper mantle. NA makes use of Voronoi cells to help construct a searchable parameter space, with the aim of preferentially sampling regions of low data misfit. In the inversion process, a Thomson-Haskell matrix method (Thomson, 1950 and Haskell, 1953) was used to calculate a synthetic radial RF for a given 1-D (layered) structure. During the inversion, as in Shibutani et al. (1996) and Clitheroe et al. (2000), each model is described by six layers: a layer of sediment, a basement layer, an upper crust, middle crust and lower crust, and an underlying mantle layer, all of which feature velocity gradients and potentially, velocity jumps across boundaries. The inversion involves constraining 24 parameters:  $V_s$  values at the top and bottom of each layer, layer thickness and the  $V_p/V_s$  ratio in each layer (Table 1). The inclusion of  $V_p/V_s$  ratio as an

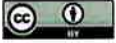

unknown primarily aims to accommodate the effects of a sediment layer with limited prior constraints (Bannister et al., 2003). There are two important controlling parameters required by NA: (1) the number of models produced per iteration ( $n_s$ ), and (2) the number of neighbourhoods re-sampled per iteration ( $n_r$ ). After a number of trials we chose the maximum number of iterations to be 5500, with  $n_s = 13$  and  $n_r = 13$  for all iterations. We employ a chi-squared ( $\chi^2$ ) metric to compute the misfit function, which is a measure of the inconsistency between the true  $\phi_i^{obs}(m)$ , and predicted,  $\phi_i^{pre}(m)$  waveforms for a given model ( $m$ ):

$$\chi_v^2(m) = \frac{1}{v} \sum_{i=1}^{N_d} \left( \frac{\phi_i^{obs} - \phi_i^{pre}}{\sigma_i} \right)^2 \quad (3)$$

where  $\sigma_i$  represents the noise standard deviation determined from  $\phi_i^{obs}$ , as explained by Gouveia and Scales (1998), and  $v$  represents the number of degrees of freedom. Using the above stated parameters, the inversion targets the 1-D structure that produces the best fit between the predicted and observed RF. Figure 7 and 8 present example results of inversions via density plots of the best 1000 data-fitting  $S$ -wave velocity models produced by the NA. The optimum data-fitting model is plotted in red.

## 6 Results

### 6.1 $H$ - $\kappa$ stacking results for Moho depth and $V_p/V_s$ (including Poisson's ratio)

Maps depicting crustal thicknesses and average  $V_p/V_s$  in southeast Australia are plotted from the results obtained at 14 stations (Fig. 6 and 9). At the remaining stations, we could not detect any clear multiples or Moho conversions in the RFs from any direction. A previous study by Chevrot and van der Hilst (2000) has noted that this region is devoid of clear multiples. The crustal thickness for all analysed stations in the study area varies from  $30.0 \pm 2.1$  km (BA11) beneath King island in Bass Strait to  $39.1 \pm 0.5$  km (CAN) beneath the Lachlan Fold Belt, and the variation strongly correlates with topography. The associated  $V_p/V_s$  values range from  $1.65 \pm 0.07$  (BA11) beneath King island to  $1.76 \pm 0.04$  (YNG) beneath the Lachlan Fold Belt. Crust of the order of 30–34 km thickness occurs beneath much of VanDieland. The mountainous region of the Lachlan Fold Belt has the deepest Moho at  $39.1 \pm 0.5$  km (CAN) and a corresponding  $V_p/V_s$  value of  $1.73 \pm 0.02$ . Crust that is ~33 km thick lies beneath the East Tasmania Terrane and Eastern Bass Strait (ETT+EB). Table 2 is a summary of  $H$ - $\kappa$  stacking parameters for the analysed stations.

At ~40 km, the crustal thickness beneath the Lachlan Fold Belt is significant, but decreases southward towards VanDieland (~32.5 km) and southeastward towards the East Tasmania Terrane and Eastern Bass Strait (ETT+EB) (~33 km). Overall, the Moho becomes shallower from the southern tip of VanDieland (TAU) towards and into Bass Strait to the north, before becoming deeper once more under the mainland part of the VanDieland microcontinental block (Fig. 6a). The crustal thickness is more or less uniform beneath the Lachlan Fold Belt, East Tasmania Terrane and eastern Bass Strait.

The majority of our study region has a low-to-intermediate Poisson's ratio. Poisson's ratio is highest ( $0.262 \pm 0.014$ ) in the Lachlan Fold Belt (see Table 2). In VanDieland, the Poisson's ratios generally decrease northward into Bass Strait from  $0.240 \pm 0.019$  (MOO) to  $0.210 \pm 0.013$  (BA11) and then increase into mainland Australia

and what then is  $\tau$



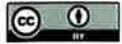

*relatively - to what?*  
*unremarkable*

287 to  $0.226 \pm 0.017$  (TOO). The relatively average to high values in the Lachlan Fold Belt ( $0.235 \pm 0.017 - 0.262 \pm$   
 288  $0.014$ ) are in agreement with the presence of a mafic lower crust, as suggested by a number of other studies  
 289 (Drummond and Collins, 1986; Shibutani et al., 1996; Clitheroe et al., 2000; Finlayson et al., 2002). The ratios  
 290 in the ETT+EB ( $0.220 \pm 0.008$  (BA08) –  $0.242 \pm 0.005$  (BA17)) agree with constraints from seismic reflection  
 291 and refraction studies and may indicate a felsic to intermediate (average) crustal composition (Finlayson et al.,  
 292 2002; Collins et al., 2003).

## 293 6.2 Nonlinear inversion results

294 Results of the NA inversion were successfully obtained for a selection of stations, as shown in Table 2. If the  
 295 Moho is defined by a gentle velocity gradient, the base of the velocity gradient is used as a proxy for the Moho  
 296 depth, as done in previous RF (e.g. Clitheroe et al., 2000; Fontaine et al., 2013a) and seismic refraction  
 297 (Collins, 1991; Collins et al., 2003) studies. We also adopt an upper mantle velocity of  $V_p = 7.6$  km/s (i.e.  $V_s =$   
 298  $4.3-4.4$  km/s for  $V_p/V_s$  ratios of 1.73-1.77 at the base of the Moho gradient) following Clitheroe et al. (2000)  
 299 who used this value for RF studies, and Collins et al. (2003) who used  $V_p > 7.8$  km/s for their summary of both  
 300 seismic refraction and RF results; these  $V_p$  values are consistent with global Earth models. Therefore, we also  
 301 require the  $S$ -wave velocity to be  $> 4.4$  km/s beneath the Moho. We present the  $S$ -wave velocity profiles from  
 302 the NA inversion for stations CAN, MOO, TOO and YNG in Figs. 7 and 8, together with observed and  
 303 predicted RFs. The  $S$ -wave velocity inversion results of the remaining two stations are included as  
 304 supplementary material (see Fig. S.10). In assigning the Moho depth, we consider three criteria to examine the  
 305 quality of the inversion result: (1) misfit value ( $\chi^2$ ); (2) the quality of the RF stack (which is based on our  
 306 ability to pick the direct and multiple phases); and (3) the visual fit between the synthetic and observed RF.  
 307 Models that fail to fit significant arrivals in the observed RF are rejected. Based on these criteria, the inversion  
 308 results are classified as:

- 309 • Very good: very low  $\chi^2$  (typically  $< 0.4$ ), very good visual fit to direct and multiple phases.
- 310 • Good: low  $\chi^2$  (typically  $0.4-0.8$ ), direct phases clearly visible, multiple phases less clear, and a good  
 311 visual fit to all major identifiable phases.
- 312 • Poor: medium to high  $\chi^2$  (in the range  $0.8-1.2$ ), direct phases visible, multiple phases unclear, and  
 313 moderate visual fit to some identifiable phases. Looking at the character of the crust-mantle transition,  
 314 this study classifies the transition zone as sharp  $\leq 2$  km, intermediate  $2-10$  km or broad  $\geq 10$  km as  
 315 initially proposed by Shibutani et al. (1996) and modified by Clitheroe et al. (2000).

## 316 7 Discussion

317 For convenience, the seismic stations were separated into three groups (Fig. 2 and Table 2) based on tectonic  
 318 settings and the results obtained. Stations YNG, CAN, CNB, MILA and BA13 are located in the Lachlan Fold  
 319 Belt; stations BA02, BA11, TAU, MOO and TOO sit above the VanDieland microcontinental block; and  
 320 stations BA07, BA08 and BA17 lie in the East Tasmania Terrane and Eastern Bass Strait (ETT+EB). This  
 321 discussion focuses on crustal thickness and the nature of the Moho from  $H-\kappa$  stacking and the nature of the crust

*the expectation  
 of the  $\chi^2$   
 reduced with  
 the correct  
 degrees of  
 freedom is 2,  
 too low and it's  
 unwarranted  
 too high and it's  
 unsupported  
 by data.*

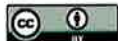

322 from  $V_p/V_s$ , Poisson's ratio and the 1-D  $S$ -wave velocity models.

### 323 7.1 Lateral variation of crustal thickness and nature of the Moho

324 The RF analysis clearly reveals the presence of lateral changes in crustal thickness that span mainland Australia  
 325 through Bass Strait to Tasmania. The stations located in the Palaeozoic Lachlan Fold Belt reveals a generally  
 326 thick crust that ranges from  $36.5 \pm 4.4$  to  $39.1 \pm 0.5$  km. At station CAN, there is a disparity in crustal thickness  
 327 obtained by the non-linear inversion method ( $\sim 49$  km) and  $H\text{-}\kappa$  stacking technique ( $39.1 \pm 0.5$  km). The reason  
 328 appears to be that the  $H\text{-}\kappa$  stacking analysis assumes that the crust is a single layer with a velocity jump across  
 329 the Moho, whereas the crust-mantle transition is actually gradual; hence it instead targets a shallower boundary  
 330 that is not the Moho. Therefore, the deep crustal structure obtained at YNG, CAN and CNB is part of a broad  
 331 velocity transition zone from crust to mantle. The crustal thickness and Moho transition zone beneath the  
 332 Lachlan Orogen obtained by the nonlinear inversion method is consistent with previous refraction and RF  
 333 studies (Shibutani et al., 1996; Clitheroe et al., 2000; Collins et al., 2003; Fontaine et al., 2013a,b). The crustal  
 334 thickness variations and lack of a clear Moho at the base of the Lachlan Orogen crust may be a consequence of  
 335 mafic magmatic underplating (e.g. Drummond and Collins, 1986; Shibutani et al., 1996; Clitheroe et al., 2000),  
 336 sourced from the ambient convecting mantle. This reinforces the opinion of Glen et al. (2002), who suggested  
 337 that the deep Moho underlying the Lachlan Orogen results from magmatic underplating that added a thick  
 338 Ordovician mafic layer at the base of the crust coupled with a thick sequence of Ordovician mafic rocks that can  
 339 be found in the mid and lower crust. Finlayson et al. (2002) and Glen et al. (2002) also inferred the presence of  
 340 underplating near CNB and CAN from seismic refraction data. Collins (2002) postulated that the underplating  
 341 might have occurred in the back-arc region of a subduction zone due to pronounced adiabatic decompression  
 342 melting in the asthenosphere. The seismic tomography model of Rawlinson et al. (2010, 2011) exhibits an  
 343 increase in  $P$ -wavespeed at 50 km depth beneath CAN, CNB and YNG and the authors suggest that magmatic  
 344 underplating may be the cause of the high velocity anomaly. A recent study by Davies et al. (2015) identified  
 345 the longest continental hotspot track in the world (over 2000 km total length), which began in north Queensland  
 346 at  $\sim 33$  Ma, and propagated southward underneath the present day Lachlan Fold Belt and Bass Strait. The  
 347 magmatic underplating could therefore be a consequence of the passage of the continent above a mantle  
 348 upwelling leading to a more diffuse crust-mantle transition zone. The thickened crust and a transitional Moho  
 349 observed in the Lachlan Fold Belt are consistent with the proposed delamination models of Collins and Vernon  
 350 (1994).

351 Strong lateral changes in crustal structure and/or composition beneath VanDieland appear to be a reflection of  
 352 the region's complex tectonic history (Fig. 6 and 9). The thick crust ( $37.5 \pm 1.2$  km) beneath the Selwyn Block –  
 353 within the northern margin of VanDieland in southern Victoria – thins (to  $30.5 \pm 2.1$  km) as it enters Bass Strait,  
 354 yet in southern Tasmania, at stations TAU and MOO, the crust is thicker ( $33.5 \pm 1.9$  km). This is reflected in  
 355 both the NA inversion and  $H\text{-}\kappa$  stacking depth estimates where a sharp Moho is observed beneath this region of  
 356 the study area (Fig. 6 and 9). The Moho depth estimates from RFs at stations TAU and MOO ( $\sim 34$  km) is  
 357 almost identical ( $\sim 35$  km) to that deduced by Korsch et al. (2002) from a seismic reflection profile adjacent to  
 358 the two seismic stations. In contrast, the Bass Strait portion of VanDieland appears to have a relatively thinner  
 359 crust ( $\sim 30$  km). This may indicate thinning of the lithosphere associated with lithospheric stretching and or

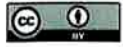

360 delamination that resulted from tectonic events that occur post-formation of the Tasmanides (Gaina et al., 1998).  
361 Stations BA07, BA08 and BA17 (ETT+EB) collectively indicate crust of uniform thickness (~33 km, Figures  
362 9a,b). Relative to western Bass Strait, the crust thickens slightly in this part of the study area, which may  
363 suggest underplating associated with a Palaeozoic subduction system (e.g. Drummond and Collins, 1986; Gray  
364 and Foster, 2004). Furthermore, our results support the crustal thickness estimates of Tasmania from refraction  
365 and wide-angle reflection travel time tomography by Rawlinson et al. (2001). They suggested that the  
366 thickening of the crust beneath central northern Tasmania is associated with the suturing of the West and East  
367 Tasmania Terranes during the Middle Devonian Tabberabberan Orogeny. The Moho depths we obtained at  
368 stations TAU, MOO, BA02 and BA11 which are located within their study area show significant overlap in  
369 crustal thickness estimates (Fig. S10 in supplementary material).

370 In general, our understanding of crustal thicknesses variations are limited by station separation, so it is difficult  
371 to determine whether smooth variations in thickness or step-like transitions explain the observations.

## 372 7.2 Poisson's ratio, $V_p/V_s$ and average crustal composition

373 Poisson's ratio, which shares an inverse squared relationship to  $V_p/V_s$  (Eq. 2) can constrain chemical  
374 composition and mineralogy more robustly than  $P$ - or  $S$ -wave velocity in isolation (Christensen and Fountain,  
375 1975). We observe variations in Poisson's ratio (and hence  $V_p/V_s$ ) across the study region, which we equate  
376 with variations in composition. Studies in mineral physics and field observations show (1) a linear increase in  
377 Poisson's ratio with decreasing  $\text{SiO}_2$  content in the continental crust and (2) partial melt is depicted by an  
378 elevated Poisson's ratio ( $>0.30$ ), especially if the anomaly is localised to an intra-crustal layer (Owens and  
379 Zandt, 1997). In terms of  $V_p/V_s$ , a more felsic ( $\text{SiO}_2$ ) composition in the lower crust is represented by a lower  
380  $V_p/V_s$ , which reflects removal of an intermediate-mafic zone by delamination, whereas a more mafic lower crust  
381 is depicted by higher  $V_p/V_s$  ( $> 1.75$ ) which may be due to underplated material (Pan and Niu, 2011). However,  
382 lower crustal delamination can also result in decompression melting, which can yield elevated  $V_p/V_s$  (He et al.,  
383 2015). We interpret the variation of observed Poisson's ratios (0.210–0.256) in the southern Tasmanides to be a  
384 consequence of compositionally heterogeneous crust and localised partial melt that may likely be sourced from  
385 recent intraplate volcanism (Rawlinson et al., 2017).

386 Figure 6b shows the distribution of bulk  $V_p/V_s$  across the study area. Upon comparison with our Moho depth  
387 results (Fig. 6a and 9a,b), we find that areas of thick crust (Lachlan Fold Belt) do overlap with areas of higher  
388  $V_p/V_s$  ( $1.70 \pm 0.04 - 1.76 \pm 0.04$ ). This may strengthen the argument for mafic magmatic underplating sourced  
389 from an ambient convecting mantle (Glen et al., 2002). At MILA, BA13, CAN and CNB, the  $V_p/V_s$  values ( $1.70$   
390  $\pm 0.04 - 1.73 \pm 0.06$ ) are consistent with mafic granulite (Christensen and Fountain, 1975) which has been  
391 suggested to occur in the lower crust based on a wide-angle seismic line that cross-cuts the southern region of  
392 the Lachlan Orogen (Finlayson et al., 2002). At station YNG the  $V_p/V_s$  value of  $1.76 \pm 0.04$  is consistent with  
393 biotite gneisses deduced from seismic reflection experiments carried out across the Junee-Narromine Volcanic  
394 Belt in the neighborhood of YNG (Direen et al., 2001).

395 The VanDieland  $V_p/V_s$  distribution is rather complex, hence we further divide this block into two separate

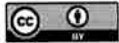

groups: (1) West Tasmania Terrane (WTT); (2) and the Selwyn block. In the WTT, stations BA02, TAU, MOO (see Fig. 2 for the location) have a moderate  $V_p/V_s$  ( $1.69 \pm 0.02$ – $1.71 \pm 0.04$ ). The bulk  $V_p/V_s$  beneath BA02 ( $1.69 \pm 0.02$ ) supports a dominantly felsic crustal composition, which means that it is unlikely that the WTT has a mafic lower crust. A felsic crustal composition is at odds with the crustal composition required by the lower crustal flow model of Drummond and Collins (1986); Gray and Foster (2004). Our  $V_p/V_s$  measurement from the permanent GSN station TAU ( $1.70 \pm 0.08$ ), agrees well with  $V_p/V_s$  value at BA02 which implies a similar crustal composition. Station MOO adjacent to TAU exhibits a similar  $V_p/V_s$  value ( $1.71 \pm 0.04$ ) and together this may indicate that the crust is more or less homogeneous in this region. However, the slight variation in  $V_p/V_s$  values between station MOO and TAU may be associated with a slight change in bulk composition and the effects of heating following juxtaposition of western and eastern Tasmania during the Middle Devonian Tabberabberan Orogeny.

In Bass Strait and south central Victoria (underlain in part by the Selwyn Block), the abrupt variations in  $V_p/V_s$  values across stations BA11 and TOO help to underscore the region's complex tectonic evolution. Very few reliable  $H$ - $\kappa$  stacking parameters were observed in this region: one on King Island (BA11) and the other adjacent to the NVP in south central Victoria. This is attributed to low signal quality/difficulty in identifying crustal multiples in this region (Chevrot and van der Hilst, 2000). The presence of a complex and compositionally variable Selwyn Block beneath the stations (Cayley et al., 2002), and melt-induced heating of the crust associated with the Quaternary NVP, may also be contributing factors. The  $V_p/V_s$  value at BA11 ( $1.65 \pm 0.07$ ) is the lowest in the study area which may imply a lower crustal delamination in Bass Strait, leaving a dominantly felsic crust (e.g. He et al., 2015; Bello et al., 2019b).

Station TOO located adjacent to the NVP exhibits a relatively low  $V_p/V_s$  ( $1.68 \pm 0.04$ ) that implies a more felsic composition, although mantle upwelling generated by the combined effects of a plume, SDU (shear driven upwelling) and EDC (edge driven convection) (Rawlinson et al., 2017) would likely yield melts of a mafic composition, so the low  $V_p/V_s$  may be caused by something else.

Despite the fact that crustal composition was possibly altered by recent deformational events that resulted from the break-up between Antarctica and Australia, similar  $V_p/V_s$  measurements are generally observed from the southern tip of Victoria through King Island to northwestern Tasmania. This suggests a tectonic relationship between northwest Tasmania and the Selwyn block and appears to support the presence of a coherent Precambrian microcontinental block (VanDieland) postulated by several studies in the preceding ~20 years (Cayley et al., 2002; Cayley, 2011; Moresi et al., 2014; Pilia et al., 2015a).

## 8 Conclusions

We used  $H$ - $\kappa$  stacking of teleseismic RFs to determine crustal thickness and  $V_p/V_s$  ratios; we also generate 1-D  $S$ -wave velocity profiles of the crust from 1-D RF inversion in order to investigate the internal crustal velocity structure beneath the southern Tasmanides. We were able to verify the presence of several crustal structures imaged by previous studies (Clitheroe et al., 2000; Finlayson et al., 2002; Glen et al., 2002; Reading et al., 2011; Fontaine et al., 2013a,b) where there is overlap and we have also been able to provide new estimates of crustal thickness and composition. We have also been able to shed fresh light on the different tectonic blocks that

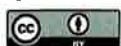

433 constitute southeast Australia. The major conclusions are as follows:

- 434 • The thick crust and broad crust-mantle transition beneath the Lachlan Fold Belt may be caused by  
 435 magmatic underplating of mafic materials beneath the crust, which is consistent with a relatively high  
 436 Poisson's ratio ( $0.262 \pm 0.014$ ). Thicker crust is also to be expected from the elevated topography  
 437 beneath the eastern Lachlan Fold Belt.
- 438 • The crustal structure is complex in VanDieland. It thins from the northern tip of the microcontinent  
 439 into Bass Strait, yet in southern Tasmania the crust is thicker ( $33.5 \pm 1.9$  km) compared to Bass Strait.  
 440 This scenario may be attributed to the break-up of Antarctica and Australia and the opening of the  
 441 Tasman Sea which formed three failed rift basins that contain thick piles of sedimentary rocks (Gaina  
 442 et al., 1998). The thinner crust beneath Bass Strait may indicate that the thinning of the lithosphere is  
 443 associated with processes such as delamination and/or stretching of the lithosphere during the break-up  
 444 of the two continents.
- 445 • Stations at ETT+EB collectively indicate crust of uniform thickness ( $\sim 33$  km) and an intermediate  
 446 Moho transition which possibly reflects underplating associated with a Palaeozoic subduction system.
- 447 • It is clear that the nature of velocity anomalies differ between stations on mainland Australia and  
 448 Tasmania. This highlights contrasting lithospheric structure across Bass Strait ( $\sim 40^\circ$  S) with thin  
 449 lithosphere to the south and thick lithosphere to the north. This sharp transition of lithospheric  
 450 thickness is in agreement with previous results (Clitheroe et al., 2000) and corresponds to changes in  
 451 fast S-wave polarization directions from primarily northeast-southwest orientations in the north to  
 452 nearly northwest-southeast directions in the south (Heintz and Kennett, 2005; Pilia et al., 2016; Bello  
 453 et al., 2019a).

454 Results from this study advance our understanding of the nature and composition of different tectonic blocks  
 455 that constitute the geology of the southern Tasmanides. These results will also be important for helping to  
 456 understand the results from other comparable seismic imaging studies and the interpretation of tectonic  
 457 processes on a wider scale.

#### 458 **9 Data availability**

459 Dataset available at [10.6084/m9.figshare.12233723](https://doi.org/10.6084/m9.figshare.12233723)

460

#### 461 **10 Author contributions**

462 M.B. performed the data analysis and wrote the draft manuscript. N.R. and D.C. guided the study and assisted in  
 463 interpretation. M.B., D.C. and N.R. discussed the results and revised the manuscript. A.R. and O.L. revised the  
 464 manuscript and assisted with the interpretation.

465 **11 Competing Interests:** The authors declare no competing interests.



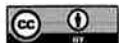

## 466 12 Acknowledgments

467 The work in this paper was performed as part of a PhD study and has been jointly funded by Abubakar Tafawa  
468 Balewa University (ATBU), Bauchi, Nigeria and the University of Aberdeen, UK. The authors acknowledge the  
469 efforts of staff, students and fieldwork technicians from the Australian National University and University of  
470 Tasmania, who deployed the temporary BASS array used in this study. We also thank Qi Li and Armando  
471 Arcidiaco for their efforts in BASS data pre-processing and archiving. Australian Research Council Grant  
472 LP110100256 supported the BASS deployment. We are grateful to IRIS and Geoscience Australia for providing  
473 data from several stations in mainland Australia and Tasmania. Figure 1 was made using Inkscape software  
474 (Harrington, et. al., 2005) and Figures 2, 3, 6 and 9 were produced using the Generic Mapping Tools (Wessel et  
475 al., 2013).

476

477

478

479

480

481

482

483

484

485

486

487

488

489

490

491

492

493

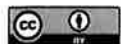494 **References**

- 495 Amante, C. and Eakins, B. W.: ETOPO1 1 Arc-Minute Global Relief Model: Procedures, data sources and  
496 analysis, NOAA technical memorandum NESDIS NGDC-24, 19pp, 2009.
- 497 Ammon, C. J.: The isolation of receiver effects from teleseismic P waveforms. *Bull. Seis. Soc. Ame.*, 81, 2504–  
498 2510, 1991.
- 499 Ammon, C. J., Randall, G., and Zandt, G.: On the nonuniqueness of receiver function inversions. *J. Geophys.*  
500 *Res.*, 95, 15 303–15 318, 1990.
- 501 Arroucau, P., Rawlinson, N., and Sambridge, M.: New insight into Cainozoic sedimentary basins and  
502 Palaeozoic suture zones in southeast Australia from ambient noise surface wave tomography. *Geophys. Res.*  
503 *Lett.*, 37, <http://dx.doi.org/10.1029/2009GL041974>, 2010.
- 504 Bannister, S., Yu, J., Leitner, B., and Kennett, B. L. N.: Variations in crustal structure across the transition from  
505 West to East Antarctica, Southern Victoria Land, *Geophys. J. Int.*, 155, 870–884, 2003.
- 506 Bello, M., Cornwell, D. G., Rawlinson, N., and Reading, A. M.: Insights into the structure and dynamics of the  
507 upper mantle beneath Bass Strait, southeast Australia, using shear wave splitting, *Phys. Earth Planet. Inter.*,  
508 289, 45–62, <https://doi.org/10.1016/j.pepi.2019.02.002>, 2019a.
- 509 Bello, M., Rawlinson, N., Cornwell, D. G., Crowder, E., Salmon, M., and Reading, A. M.: Structure of the crust  
510 and upper mantle beneath Bass Strait, southeast Australia, from teleseismic body wave tomography, *Phys.*  
511 *Earth Planet. Inter.*, 294, <https://doi.org/10.1016/j.pepi.2019.106276>, 2019b.
- 512 Berry, R. F., Steele, D. A., and Maffre, S.: Proterozoic metamorphism in Tasmania: implications for tectonic  
513 reconstructions, *Prec. Res.*, 166, 387–396. <https://doi.org/10.1016/j.precamres.2007.05.004>, 2008.
- 514 Bodin, T., Salmon, M., Kennett, B. L. N., and Sambridge, M.: Probabilistic surface reconstruction from multiple  
515 datasets: an example for the Australian Moho, *J. Geophys. Res.: Solid Earth*, 117,  
516 <http://dx.doi.org/10.1029/2012JB009547>, 2012a.
- 517 Bodin, T., Sambridge, M., Rawlinson, N., and Arroucau, P.: Transdimensional tomography with unknown data  
518 noise, *Geophys. J. Int.*, 189, 1536–1556, 2012b.
- 519 Boger, S. and Miller, J.: Terminal suturing of Gondwana and the onset of the Ross Delamerian Orogeny: the  
520 cause and effect of an Early Cambrian reconfiguration of plate motions, *Earth Planet. Sci. Lett.*, 219, 35–48,  
521 2004.
- 522 Calvert, C. R. and Walter, M. R.: The Late Neoproterozoic Grassy Group of King Island, Tasmania: correlation  
523 and palaeogeographic significance, *Precam. Res.*, 100, 299–312, 2000.
- 524 Cawood, P. A.: Terra Australis Orogen: Rodinia breakup and development of the Pacific and Iapetus margins of  
525 Gondwana during the Neoproterozoic and Palaeozoic. *Earth-Science Reviews*, 69, 249–279,  
526 <http://dx.doi.org/10.1016/j.earscirev.2004.09.001>, 2005.
- 527 Cayley, R.: Exotic crustal block accretion to the eastern Gondwanaland margin in the Late Cambrian Tasmania,  
528 the Selwyn Block, and implications for the Cambrian–Silurian evolution of the Ross, Delamerian, and  
529 Lachlan orogens. *Gond. Res.*, 19, 628–649. <http://dx.doi.org/10.1016/j.gr.2010.11.013>, 2011.
- 530 Cayley, R., Korsch, R. J., Moore, D. H., Costelloe, R. D., Nakamura, A., Willman, C. E., Rawlin, T. J., Morand,  
531 V. J., Skladzien, P. B., and O’Shea, P. J.: Crustal architecture of central Victoria: results from the 2006 deep  
532 crustal reflection seismic survey, *Aust. J. Earth Sci.*, 59, 113–156, 2011.
- 533 Cayley, R., Taylor, D. H., VandenBerg, A. H. M., and Moore, D. H.: Proterozoic–Early Palaeozoic rocks and  
534 the Tyennan Orogeny in central Victoria: the Selwyn Block and its tectonic implications, *Aust. J. Earth Sci.*,  
535 49, 225–254, 2002.

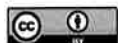

- 536 Chen, Y., Niu, F., Liu, R., Huang, Z., Tkalčić, H., Sun, L., and Chan, W.: Crustal structure beneath China from  
 537 receiver function analysis, *J. Geophys. Res.*, 49(B033067), 2010.
- 538 Chevrot, S. and van der Hilst, R. D.: The Poisson ratio of the Australian crust: Geological and Geophysical  
 539 implications, *Earth Planet. Sci. Lett.*, 183, 121–132, 2000.
- 540 Christensen, N. I.: Poisson's ratio and crustal seismology, *J. Geophys. Res.*, 101, 3139–3156, 1996.
- 541 Christensen, N. I. and Fountain, D. M.: Constitution of the lower continental crust based on experimental  
 542 studies of seismic velocities in granulite, *Geol. Soc. Ame. Bull.*, 86, 227–236, 1975.
- 543 Clitheroe, G., Gudmundsson, O., and Kennett, B.: The crustal thickness of Australia, *J. Geophys. Res.*, 105, 13  
 544 697–13 713, 2000.
- 545 Collins, C. D. N.: The nature of crust–mantle boundary under Australia from seismic evidence, In: Drummond  
 546 B. J. ed. *The Australian lithosphere*, *Geol. Soc. Aust. Spec. Pub.*, 17, 67–80, 1991.
- 547 Collins, C. D. N., Drummond, B. J., and Nicoll, M. G.: Crustal thickness patterns in the Australian continent,  
 548 *Geol. Soc. Ame. Spec. Papers*, 372, 121–128, 2003.
- 549 Collins, W. J.: Nature of extensional accretionary origins, *Tectonics*, 21, 1024–1036, 2002.
- 550 Collins, W. J. and Vernon, R. H.: A rift–drift–delamination model of continental evolution: Palaeozoic tectonic  
 551 development of eastern Australia, *Tectonophysics*, 2(35), 1994.
- 552 Coney, P. J.: Plate tectonics and the Precambrian Phanerozoic evolution of Australia, *PACRIM '95*, *Aust. Inst.*  
 553 *Mining and Metallurgy*, pages 145–150, 1995.
- 554 Coney, P. J., Edwards, A., Hine, R., Morrison, F., and Windrim, D.: The regional tectonics of the Tasman  
 555 orogenic system, eastern Australia, *J. Struct. Geol.*, 12(5/6), 519–543, 1990.
- 556 Crowder, E., Rawlinson, N., Pilia, S., Cornwell, D. G., and Reading, A. M.: Transdimensional ambient noise  
 557 tomography of Bass Strait, southeast Australia, reveals the sedimentary basin and deep crustal structure  
 558 beneath a failed continental rift, *Geophys. J. Int.*, 217, 970–987, 2019.
- 559 Davies, D. R., Rawlinson, N., Iaffaldano, N., and Campbell, I. H.: Lithospheric controls on magma composition  
 560 along Earth's longest continental hotspot track, *Nature*, 525, 511–514, 2015.
- 561 Direen, N. G., Lyons, P., Korsch, R. J., and Glen, R. A.: Integrated geophysical appraisal of crustal architecture  
 562 in the Eastern Lachlan Orogen, *Explo. Geophys.*, 32, 252–262, 2001.
- 563 Drummond, B. J. and Collins, C. D. N.: Seismic evidence for underplating of the lower continental crust of  
 564 Australia, *Earth Planet. Sci. Lett.*, 79, 361–372, 1986.
- 565 Drummond, B. J., Lyons, P., Goleby, B., and Jones, L.: Constraining models of the tectonic setting of the giant  
 566 Olympic Dam iron-oxide-copper-gold deposit, south Australia, using deep seismic reflection data,  
 567 *Tectonophysics*, 420, 91–103, 2006.
- 568 Eagar, K. C. and Fouch, M. J.: FuncLab: A MATLAB interactive toolbox for handling receiver function  
 569 datasets, *Seismo. Res. Lett.*, <https://doi.org/10.1785/gssrl.83.3.596>, 2012.
- 570 Finlayson, D. M., Collins, C. D. N., and Denham, D.: Crustal structure under the Lachlan Fold Belt,  
 571 southeastern Australia, *Phys. Earth Planet. Int.*, 21, 321–342, 1980.
- 572 Finlayson, D. M., Korsch, R. J., Glen, R. A., Leven, J. H., and Johnstone, D. W.: Seismic imaging and crustal  
 573 architecture across the Lachlan transverse zone, a crosscutting feature of eastern Australia, *Aust. J. Earth*  
 574 *Sci.*, 49, 311–321, 2002.
- 575 Fishwick, S. and Rawlinson, N.: 3–D structure of the Australian lithosphere from evolving seismic datasets,  
 576 *Aust. J. Earth Sci.*, 59, 809–826, 2012.

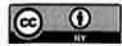

- 577 Foden, J., Elburg, M. A., Dougherty-Page, J., and Burt, A.: The timing and duration of the Delamerian  
578 Orogeny: correlation with the Ross Orogen and implications for Gondwana assembly, *J. Geology*, 114, 189–  
579 210, 2006.
- 580 Fontaine, F. R., Tkalčić, H., and Kennett, B. L. N.: Crustal complexity in the Lachlan Orogen revealed from  
581 teleseismic receiver functions, *Aust. J. Earth Sci.*, 60, 413–430, 2013a.
- 582 Fontaine, F. R., Tkalčić, H., and Kennett, B. L. N.: Imaging crustal structure variation across southeastern  
583 Australia, *Tectonophysics*, 582, 112–125, 2013b.
- 584 Foster, D. A. and Gray, D. R.: Evolution and structure of the Lachlan Fold Belt (Orogen) of eastern Australia,  
585 *Annu. Rev. Earth Planet. Sci.*, 28, 47–80, 2000.
- 586 Gaina, C., Müller, D., Royer, J. Y., Stock, J., Hardebeck, J., and Symonds, P.: The tectonic history of the  
587 Tasman Sea, a puzzle with 13 pieces, *J. Geophys. Res.*, 103, 12,413–12,433, 1998.
- 588 Gibson, G. M., Morse, M. P., Ireland, T. R., and Nayak, G. K.: Arc-continent collision and orogenesis in  
589 western Tasmanides: insights from reactivated basement structures and formation of an ocean-continent  
590 transform boundary off western Tasmania, *Gondwana Res.*, 19, 608–627, 2011.
- 591 Glen, R. A.: The Tasmanides of Eastern Australia. In: Vaughan, A. P. M., Leat, P. T., Pankhurst, R. J. (Eds.),  
592 *Terrane Processes at the Margins of Gondwana*, Geological Society, pages 23–96, 2005.
- 593 Glen, R. A.: Refining accretionary orogen models for the Tasmanides of eastern Australia, *Aust. J. Earth Sci.*,  
594 60, 315–370, 2013.
- 595 Glen, R. A., Korsch, R. J., Direen, N. G., Jones, L. E. A., Johnstone, D. W., Lawrie, K. C., Finlayson, D. M.,  
596 and Shaw, R. D.: Crustal structure of the Ordovician Macquarie Arc, eastern Lachlan Orogen, based on  
597 seismic-reflection profiling, *Aust. J. Earth Sci.*, 49, 323–348, 2002.
- 598 Glen, R. A., Percival, I. G., and Quinn, C. D.: Ordovician continental margin terranes in the Lachlan Orogen,  
599 Australia: implications for tectonics in an accretionary orogen along the east Gondwana margin, *Tectonics*,  
600 28, <https://doi.org/10.1029/2009TC002446>, 2009.
- 601 Goldstein, P., Dodge, D., Firpo, M., and Minner, L.: SAC2000: Signal processing and analysis tools for  
602 seismologists and engineers. Lee, W. H. K. and Kanamori, H. and Jennings, P. C. and Kisslinger, C. (Eds.).  
603 In *IASPEI International Handbook of Earthquake and Engineering Seismology*, Academic Press, London,  
604 2003.
- 605 Gouveia, W. P. and Scales, J. A.: Bayesian seismic waveform inversion: Parameter estimation and uncertainty  
606 analysis, *J. Geophys. Res.*, 103, 2759–2779, 1998.
- 607 Gray, D. R. and Foster, D. A.: Tectonic evolution of the Lachlan Orogen, southeastern Australia: historical  
608 review, data synthesis and modern perspectives, *Aust. J. Earth Sci.*, 51, 773–817, 2004.
- 609 Gunn, P. J., Maidment, D. W., and Milligan, P.: Interpreting aeromagnetic data in areas of limited outcrop,  
610 *AGSO J. Aust. Geol. Geophys.*, 17, 175–185, 1997.
- 611 Harrington, B. et al (2004-2005). Inkscape. <http://www.inkscape.org/>.
- 612 Haskell, N. A.: The dispersion of surface waves in multilayered media, *Bulletin of the Seismological Society*  
613 *America*, 43, 1734, <http://dx.doi.org/10.1038/physci245109a0>, 1953.
- 614 He, C. S., Santosh, M., Dong, S. W., and Wang, S. C.: Crustal thickening and uplift of the Tibetan Plateau  
615 inferred from receiver function analysis, *J. Asian Earth Sci.*, 99, 112–124, 2015.
- 616 Heintz, M. and Kennett, B. L. N.: Continental scale shear wave splitting analysis: Investigation of seismic  
617 anisotropy underneath the Australian continent, *Earth Planet. Sci. Lett.*, 236, 106–119, 2005.
- 618 Kennett, B. L. N. and Furumura, T.: Stochastic waveguide in the lithosphere: Indonesian subduction zone to

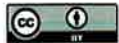

- 619 Australian craton, *Geophys. J. Int.*, 172, 363–382, 2008.
- 620 Kennett, B. L. N., Salmon, M., Saygin, E., and Group, A.: AusMoho: the variation of Moho depth in Australia,  
621 *Geophys. J. Int.*, 187, 946–958, 2011.
- 622 Korsch, R. J., Barton, T. J., Gray, D. R., Owen, A. J., and Foster, D. A.: Geological interpretation of a deep  
623 seismic reflection transect across the boundary between the Delamerian and Lachlan Orogens, in the vicinity  
624 of the Grampians, western Victoria, *Aust. J. Earth Sci.*, 49, 1057–1075, <http://dx.doi.org/10.1046/j.1440-0952.2002.00963.x>, 2002.
- 626 Langston, C. A.: Structure under Mount Rainier, Washington, inferred from teleseismic body waves, *J.*  
627 *Geophys. Res.*, 84, 4749–4762, <https://doi.org/10.1071/EG994019>, 1979.
- 628 Li, Z. X., Baillie, P. W., and Powell, C. M.: Relationship between northwestern Tasmania and East  
629 Gondwanaland in the Late Cambrian/Early Ordovician Paleomagnetic evidence, *Tectonics*, 16, 161–171,  
630 <http://dx.doi.org/10.1029/96TC02729>, 1997.
- 631 Ligorria, J. P. and Ammon, C. J.: Iterative deconvolution and receiver function estimation, *Bull. Seism. Soc.*  
632 *Ame.*, 89, 1395–1400, 1999.
- 633 Mavko, M.: Velocity and attenuation in partially molten rocks, *J. Geophys. Res.*, 85, 5173–5189,  
634 <https://doi.org/10.1029/JB085iB10p05173>, 1980.
- 635 Moore, D., Betts, P. G., and Hall, M.: Fragmented Tasmania: the transition from Rodinia to Gondwana, *Aust. J.*  
636 *Earth Sci.*, 62, 1–35, 2015.
- 637 Moore, D. H., Betts, P. G., and Hall, M.: Constraining the VanDieland microcontinent at the edge of East  
638 Gondwana, Australia, *Tectonophysics*, 687, 158–179, 2016.
- 639 Moresi, L., Betts, P. G., Miller, M. S., and Cayley, R. A.: Dynamics of continental accretion, *Nature*, 508, 245–  
640 248, 2014.
- 641 Morse, M., Gibson, G., and Mitchell, C.: Basement constraints on offshore basin architecture as determined by  
642 new aeromagnetic data acquired over Bass Strait and western margin of Tasmania, *ASEG Extended*  
643 *Abstracts 2009*, pages 1–9, <http://dx.doi.org/10.1071/ASEG2009ab042>, 2009.
- 644 Owens, T. J., Taylor, S. R., and Zandt, G.: Crustal structure at regional seismic test network stations determined  
645 from inversion of broadband teleseismic P waveforms, *Bull. Seismo. Soc. Ame.*, 77, 631–632, 1987.
- 646 Owens, T. J. and Zandt, G.: Implications of crustal property with variations for models of Tibetan Plateau  
647 evolution, *Nature*, 387, 37–43, 1997.
- 648 Pan, S. Z. and Niu, F. L.: Large contrasts in crustal structure and composition between the Ordos plateau and the  
649 NE Tibetan plateau from receiver function analysis, *Earth Plan. Sci. Lett.*, 303, 291–298, 2011.
- 650 Pilia, S., Arroucau, P., Rawlinson, N., Reading, A. M., and Cayley, R. A.: Inherited crustal deformation along  
651 the East Gondwana margin revealed by seismic anisotropy tomography, *Geophys. Res. Lett.*, 43(23), 12082–  
652 12090, <https://doi.org/10.1002/2016GL071201>, 2016.
- 653 Pilia, S., Rawlinson, N., Cayley, R. A., Musgrave, R., Reading, A. M., Direen, N. G., and Young, M. K.:  
654 Evidence of micro-continent entrainment during crustal accretion, *Sci. Rep.*, 5,  
655 <http://dx.doi.org/10.1038/srep08218>, 2015a.
- 656 Pilia, S., Rawlinson, N., Green, N. G., Reading, A. M., Cayley, R., Pryer, L., Arroucau, P., and Duffet, M.:  
657 Linking mainland Australia and Tasmania using ambient seismic noise tomography: Implications for the  
658 tectonic evolution of the east Gondwana margin, *Gond. Res.*, 28, 1212–1227, 2015b.
- 659 Porritt, S. W. and Miller, M. S.: Updates to FuncLab, a Matlab based GUI for handling receiver functions,  
660 *Computers and Geosciences*, 111, 260–271, <https://doi.org/10.1016/j.cageo.2017.11.022>, 2018.



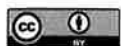

- 661 Rawlinson, N., Davies, D. R., and Pilia, S.: The mechanisms underpinning Cenozoic intraplate volcanism in  
662 eastern Australia, Insights from seismic tomography and geodynamic modeling, *Geophys. Res. Lett.*, 44(19),  
663 9,681–9,690, 2017.
- 664 Rawlinson, N., Housman, G. A., Collins, C. D. N., and Drummond, B. J.: New evidence of Tasmania's tectonic  
665 history from a novel seismic experiment, *Geophys. Res. Lett.*, 28, 3337–3340, 2001.
- 666 Rawlinson, N. and Kennett, B.: Teleseismic tomography of the upper mantle beneath the southern Lachlan  
667 Orogen, Australia, *Phys. Earth Planet. Inter.*, 167, 84–97, <http://dx.doi.org/10.1016/j.pepi.2008.02.07>, 2008.
- 668 Rawlinson, N., Kennett, B., Vanacore, E., Glen, R., and Fishwick, S.: The structure of the upper mantle beneath  
669 the Delamerian and Lachlan orogens from simultaneous inversion of multiple teleseismic datasets, *Gond.*  
670 *Res.*, 19, 788–799, 2011.
- 671 Rawlinson, N., Kennett, B. L. N., Salmon, M., and Glen, R. A.: Origin of lateral heterogeneities in the upper  
672 mantle beneath Southeast Australia from seismic tomography, Khan, A., and Deschamps, F. (Eds.), In *The*  
673 *Earth's Heterogeneous Mantle: A Geophysical, Geodynamical and Geochemical Perspective*, pages 47–78,  
674 Springer Geophysics, Springer, 2015.
- 675 Rawlinson, N., Pilia, S., Young, M., Salmon, M., and Yang, Y.: Crust and upper mantle structure beneath  
676 southeast Australia from ambient noise and teleseismic tomography, *Tectonophysics*, 689, 143–156,  
677 <http://dx.doi.org/10.1016/j.tecto.2015.11.034>, 2016.
- 678 Rawlinson, N., Pozgay, S., and Fishwick, S.: Seismic tomography: a window into deep Earth, *Phys. Earth*  
679 *Planet. Inter.*, 178, 101–135, 2010.
- 680 Rawlinson, N. and Urvoy, M.: Simultaneous inversion of active and passive source datasets for 3-D seismic  
681 structure with application to Tasmania, *Geophys. Res. Lett.*, 33, 2006.
- 682 Reading, A. M., Tkalčić, H., Kennett, B. L. N., Johnson, S. P., and Sheppard, S.: Seismic structure of the crust  
683 and uppermost mantle of the Capricorn and Paterson Orogens and adjacent cratons, Western Australia, from  
684 passive seismic transects, *Prec. Res.*, 196–197, 295–308, 2011.
- 685 Sambridge, M. S.: Geophysical inversion with a neighbourhood algorithm – I. Searching a parameter space,  
686 *Geophys. J. Int.*, 138, 479–494, 1999a.
- 687 Sambridge, M. S.: Geophysical inversion with a neighbourhood algorithm -II. Appraising the ensemble,  
688 *Geophys. J. Int.*, 138, 479–494, 1999b.
- 689 Saygin, E. and Kennett, B. L. N.: Ambient seismic noise tomography of Australian continent, *Tectonophysics*,  
690 481, 116–125, <http://dx.doi.org/10.1016/j.tecto.2008.11.013>, 2010.
- 691 Shibutani, T., Sambridge, M. S., and Kennett, B. L. N.: Genetic algorithm inversion for receiver functions with  
692 application to crust and uppermost mantle structure beneath Eastern Australia, *Geophys. Res. Lett.*,  
693 23, 1826–1832, 1996.
- 694 Spaggiari, C. V., Gray, D. R., and Foster, D. A.: Lachlan Orogen subduction-accretion systematics revisited,  
695 *Aust. J. of Earth Sci.*, 51, 549–553, 2004.
- 696 Spaggiari, C. V., Gray, D. R., Foster, D. A., and McKnight, S.: Evolution of the boundary between the western  
697 and central Lachlan Orogen: implications for Tasmanide tectonics, *Aust. J. Earth Sci.*, 50, 725–749, 2003.
- 698 Teasdale, J., Pryer, L., Stuart-Smith, P., Romine, K., Etheridge, M., Loutit, T., and Kyan, D.: Structural  
699 framework and basin evolution of Australia's Southern Margin, *APPEA J. Australian Petroleum Production*  
700 *and Exploration Association*, 43, 13–38, <https://doi.org/10.1785/0120030123>, 2003.
- 701 Thomson, W. T.: Transmission of elastic waves through a stratified solid, *J. of App. Phys.*, 21, 89–93, 1950.
- 702 Tkalčić, H., Chen, Y., Liu, R., Huang, H., Sun, L., and Chan, W.: Multi-step modelling of teleseismic receiver  
703 functions combined with constraints from seismic tomography: Crustal structure beneath southeast China,

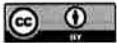

- 704 Geophys. J. Int., 187, 303–326, 2011.
- 705 Tkalčić, H., Rawlinson, N., Arroucau, P., and Kumar, A.: Multistep modelling of receiver-based seismic and  
 706 ambient noise data from WOMBAT array: crustal structure beneath southeast Australia, Geophys. J. Int.,  
 707 189, 1681–1700, <https://doi.org/10.1111/j.1365-246X.2012.05442>, 2012.
- 708 Wessel, P., Smith, W. H., Scharroo, R., Louis, J., and Wobbe, F.: Generic mapping tools: improved version  
 709 released, EOS Trans. Am. Geophys. Union, 94, 409–420, 2013.
- 710 White, L., Gibson, G., and Lister, G.: A reassessment of paleogeographic reconstructions of eastern Gondwana:  
 711 bringing geology back into the equation, Gond. Res., 24, 984–998, <http://dx.doi.org/10.1016/j.gr.2013.06.00>, 2013.
- 712
- 713 Young, M. K., Cayley, R. A., McLean, M. A., Rawlinson, N., Arroucau, P., and Salmon, M.: Crustal structure  
 714 of the east Gondwana margin in southeast Australia revealed by transdimensional ambient seismic noise  
 715 tomography, Geophys. Res. Lett., 40, 4266–4271, 2013a.
- 716 Young, M. K., Cayley, R. A., McLean, M. A., Rawlinson, N., Arroucau, P., and Salmon, M.: Crustal structure  
 717 of the east Gondwana margin in southeast Australia revealed by transdimensional ambient seismic noise  
 718 tomography, Geophys. Res. Lett., 40, 4266–4271, 2013b.
- 719 Young, M. K., Rawlinson, N., Arroucau, P., Reading, A., and Tkalčić, H.: High-frequency ambient noise  
 720 tomography of southeast Australia: new constraints on Tasmania’s tectonic past, Geophys. Res. Lett., 38,  
 721 <http://dx.doi.org/10.1029/2011GL047971>, 2011.
- 722 Young, N., Tkalčić, H., Rawlinson, N., and Reading, A. M.: Full waveform moment tensor inversion in a low  
 723 seismicity region using multiple teleseismic datasets and ambient noise: application to the 2007 Shark Bay,  
 724 Western Australia, Earthquake. Geophys. J. Int., 188, 1303–1321, [https://doi.org/10.1111/j.1365-](https://doi.org/10.1111/j.1365-246X.2011.05326)  
 725 [246X.2011.05326](https://doi.org/10.1111/j.1365-246X.2011.05326), 2012.
- 726 Zhu, L., and Kanamori, H.: Moho depth variation in southern California from teleseismic receiver functions, J.  
 727 Geophys. Res., 105, 2969–2980, 2000.
- 728
- 729
- 730
- 731
- 732
- 733
- 734
- 735
- 736
- 737
- 738
- 739
- 740
- 741
- 742
- 743
- 744
- 745

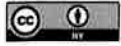

746  
 747  
 748  
 749  
 750  
 751

Table 1: Model parameter bounds used in the Neighbourhood Algorithm receiver function inversion.  $V_s^{upper}$  and  $V_s^{lower}$  represent the  $S$ -velocity at the top and bottom of a layer respectively.  $V_p/V_s$  represents  $P$  and  $S$  wave velocity ratio within a layer.

| Layer        | Thickness (m) | $V_s^{upper}$ (km/s) | $V_s^{lower}$ (km/s) | $V_p/V_s$ |
|--------------|---------------|----------------------|----------------------|-----------|
| Sediment     | 0-2           | 0.5-1.5              | 0.5-1.5              | 2.00-3.00 |
| Basement     | 0-3           | 1.8-2.8              | 1.8-2.8              | 1.65-2.00 |
| Upper crust  | 3-20          | 3.0-3.8              | 3.0-3.9              | 1.65-1.80 |
| Middle crust | 4-20          | 3.4-4.3              | 3.4-4.4              | 1.65-1.80 |
| Lower crust  | 5-15          | 3.5-4.8              | 3.6-4.9              | 1.65-1.80 |
| Mantle       | 5-20          | 4.0-5.0              | 4.0-5.0              | 1.70-1.90 |

752  
 753  
 754  
 755  
 756  
 757  
 758  
 759  
 760  
 761  
 762  
 763  
 764  
 765  
 766

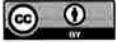

Table 2: Moho depth,  $V_p/V_s$ , Poisson's ratio and nature of the Moho for seismic stations analysed by two different techniques used in this study.

| Basic station information |            |         |         |                           | Results                 |                      |                |                              |              |
|---------------------------|------------|---------|---------|---------------------------|-------------------------|----------------------|----------------|------------------------------|--------------|
| Name                      | No. of RFs | Lon.(°) | Lat.(°) | Moho depth<br>grid search | Moho depth<br>inversion | Quality<br>inversion | Bulk $V_p/V_s$ | Poisson's ratio ( $\sigma$ ) | Nature       |
| VanDieland                |            |         |         |                           |                         |                      |                |                              |              |
| BA02                      | 4          | 145.20  | -40.95  | 31.4±2.1                  | -                       | -                    | 1.69±0.02      | 0.231±0.017                  | -            |
| BA11                      | 12         | 143.98  | -39.64  | 30.5±2.1                  | -                       | -                    | 1.65±0.07      | 0.210±0.013                  | -            |
| TAU                       | 41         | 147.32  | -42.91  | 33.5±1.9                  | 33                      | poor                 | 1.70±0.08      | 0.235±0.036                  | intermediate |
| MOO                       | 58         | 147.19  | -42.44  | 33.0±1.2                  | 34                      | good                 | 1.71±0.04      | 0.240±0.019                  | sharp        |
| TOO                       | 276        | 145.59  | -37.57  | 37.5±1.2                  | 35                      | good                 | 1.68±0.04      | 0.226±0.017                  | sharp        |
| Lachlan Fold Belt         |            |         |         |                           |                         |                      |                |                              |              |
| YNG                       | 178        | 148.40  | -34.30  | 37.0±1.2                  | 48                      | good                 | 1.76±0.04      | 0.262±0.014                  | broad        |
| CAN                       | 402        | 149.00  | -35.32  | 39.1±0.5                  | 49                      | very good            | 1.73±0.02      | 0.250±0.008                  | broad        |
| CNB                       | 155        | 149.36  | -35.32  | 38.5±1.1                  | 46                      | good                 | 1.70±0.04      | 0.235±0.017                  | broad        |
| MILA                      | 4          | 149.16  | -37.05  | 37.6±2.1                  | -                       | -                    | 1.73±0.06      | 0.251±0.023                  | -            |
| BA13                      | 6          | 148.83  | -37.63  | 36.5±4.4                  | -                       | -                    | 1.72±0.12      | 0.245±0.045                  | -            |
| ETT+EB                    |            |         |         |                           |                         |                      |                |                              |              |
| BA07                      | 5          | 148.31  | -40.43  | 32.5±0.1                  | -                       | -                    | 1.70±0.02      | 0.235±0.001                  | -            |
| BA08                      | 13         | 147.97  | -39.77  | 34.0±1.2                  | -                       | -                    | 1.67±0.03      | 0.220±0.008                  | -            |
| BA17                      | 5          | 146.33  | -39.04  | 33.2±0.5                  | -                       | -                    | 1.71±0.02      | 0.242±0.008                  | -            |

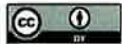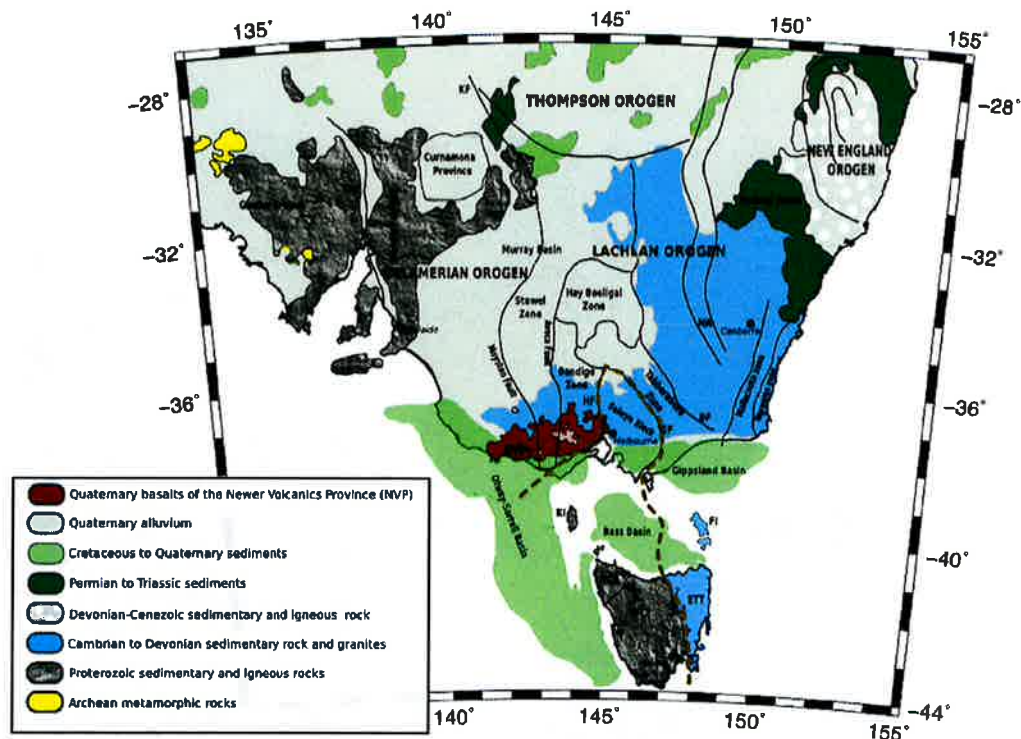

Figure 1: Regional map of southeastern Australia that shows key geological boundaries and the locations of observed or inferred tectonic units (Modified from Bello et al., 2019a). Thick black lines delineate structural boundaries and the thick brown dashed line traces out the boundary of VanDiemenland. HF = Heathcote Fault; GF = Governor Fault; BF = Bootheragandra Fault; KF = Koonenberry Fault; THZ = Torrens Hinge Zone; MA = Macquarie Arc; NVP = Newer Volcanics Province; KI = King Island and FI = Flinders Island in Bass Strait; ETT = East Tasmania Terrane; WTT = West Tasmania Terrane; TFS = Tamar Fracture System; AL = Arthur Lineament and RCB = Rocky Cape Block. Outcrop boundaries are sourced from Rawlinson et al. 2016.



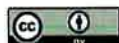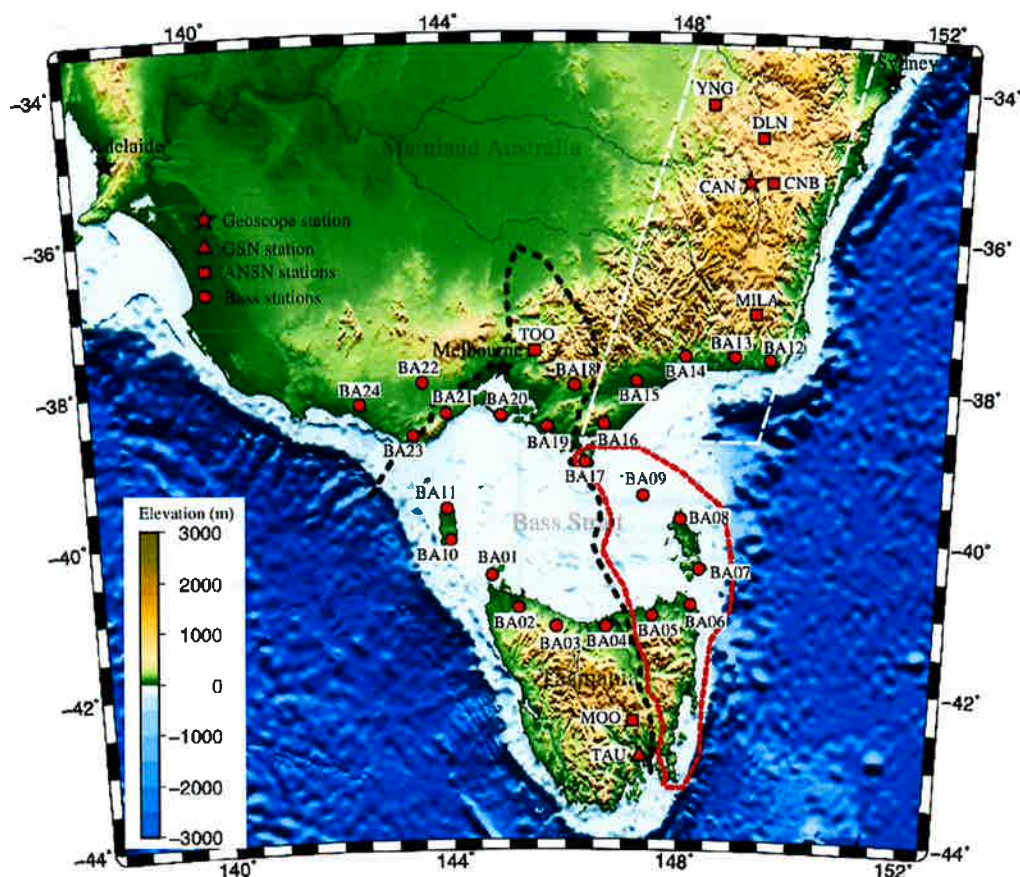

Figure 2: Location of seismic stations used in this study superimposed on a topographic/bathymetric map of southeast Australia (Modified from Bello et al., 2019a). The boundary of VanDieland is delineated by a thick black dashed line. The boundary of the East Tasmania Terrane and Furneaux Islands is represented by a thick dashed red line, while a thick dashed white line traces out the eastern sector of the Lachlan Fold Belt. Topography/bathymetry is based on the Etopo1 dataset (Amante and Eakins, 2009).

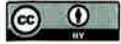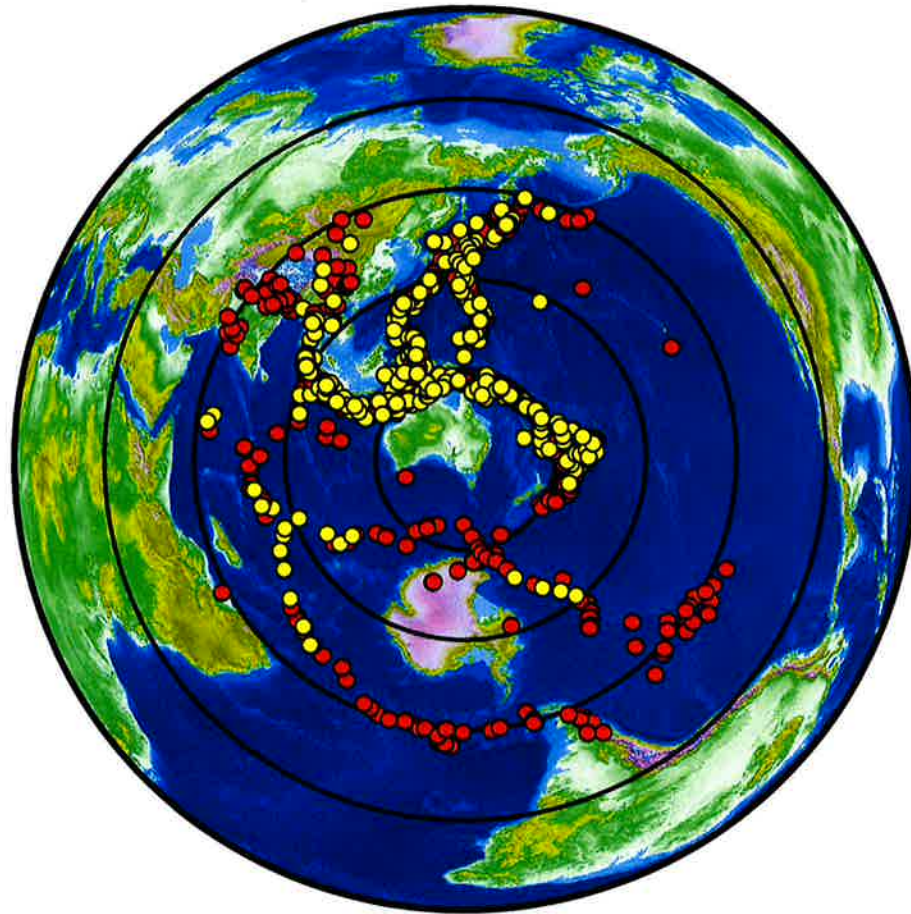

794  
 795  
 796 Figure 3: Distribution of distant earthquakes (teleseisms) used in the study. The locations of events that are  
 797 ultimately used for RF analysis are denoted by yellow dots. Concentric circles are plotted at 30° intervals from the  
 798 centre of Bass Strait. Topography/bathymetry is based on the Etopo1 dataset (Amante and Eakins, 2009).

799

↳ this is not useful unless there is a topography scale in meter, and you want us to read it.

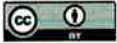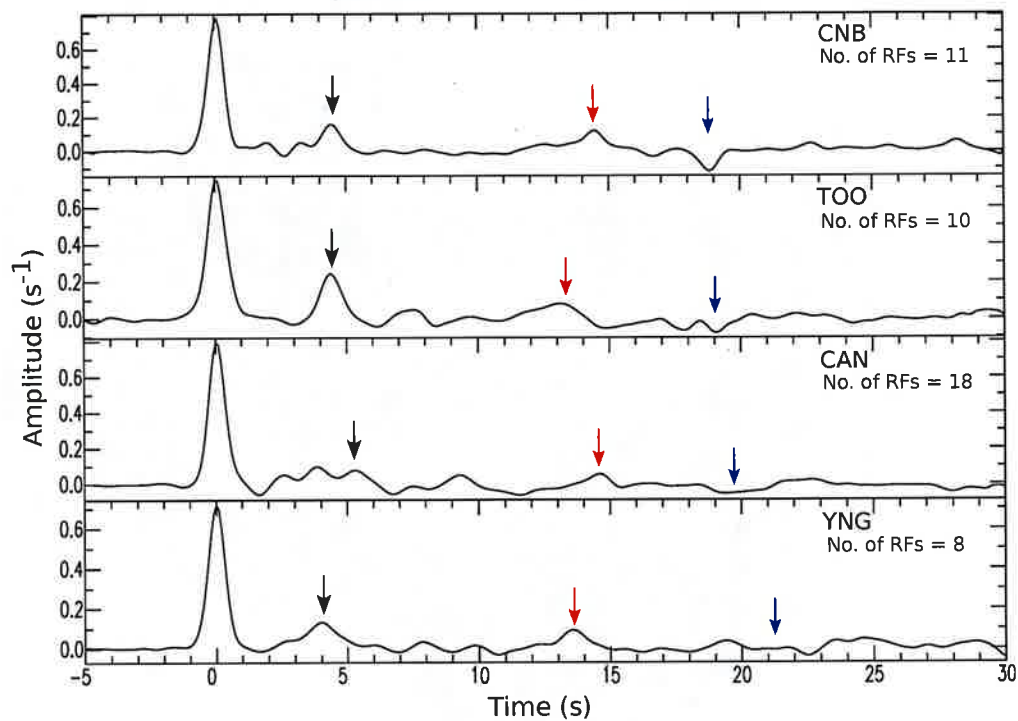

Figure 4: Stacked receiver functions from Australian National Seismic Network (ANSN) stations TOO, YNG, MOO and GSN station TAU. Small arrows indicate arrival of the  $P_s$  (black),  $PpPs$  (red) and  $PpPs + PsPs$  (blue) phases from the Moho.

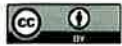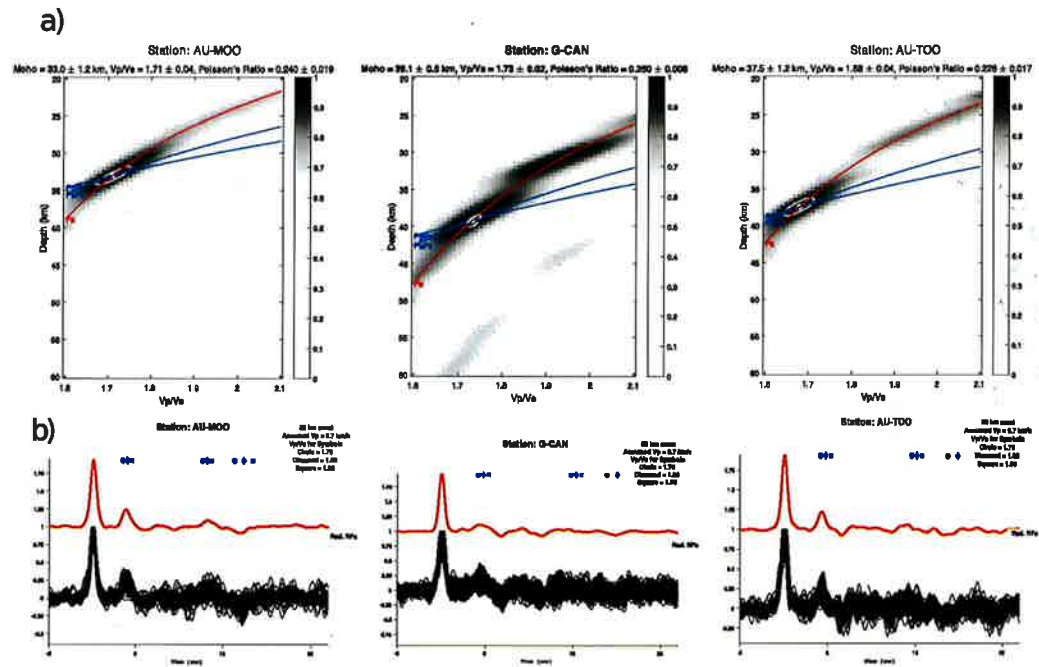

Figure 5: Results from the  $H$ - $\kappa$  stacking analysis for RFs (Zhu and Kanamori, 2000) at stations MOO, CAN and TOO. In each case (a) Normalised amplitudes of the stack over all back-azimuths along the travel time curves corresponding to the  $P_s$  and  $P_pP_s$  phases. (b) Corresponding stacked receiver function for each station.



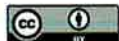

*Colors are hard to read,  
 put the numbers in next  
 to the symbols also*

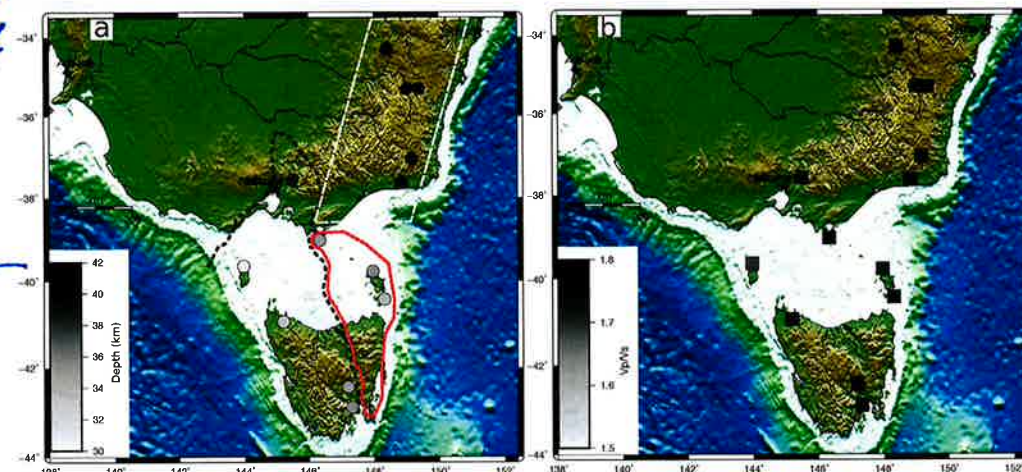

819  
 820

821 Figure 6: (a) Variations in crustal thickness and (b)  $V_p/V_s$  ratio taken from the linear ( $H-\kappa$ ) stacking results (Table 2).  
 822 Crustal thickness varies between  $30.5 \pm 0.1$  km and  $39.1 \pm 0.5$  km. Thinner crust in Bass Strait can be seen flanked by  
 823 a relatively thicker crust to the north and south.  $V_p/V_s$  ratios vary from  $1.65 \pm 0.02$  to  $1.75 \pm 0.02$ . Thick black dashed  
 824 line denotes the boundary of VanDieland. Thick red dashed line outlines the boundary of East Tasmania Terrane  
 825 and eastern Bass Strait (ETT+EB). Thick white dashed line highlights the eastern part of the Lachlan Fold Belt.  
 826 Topography/bathymetry is based on the Etopo1 dataset (Amante and Eakins, 2009).

827

*(do you need a  
 color bar for Kat  
 also)*



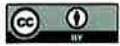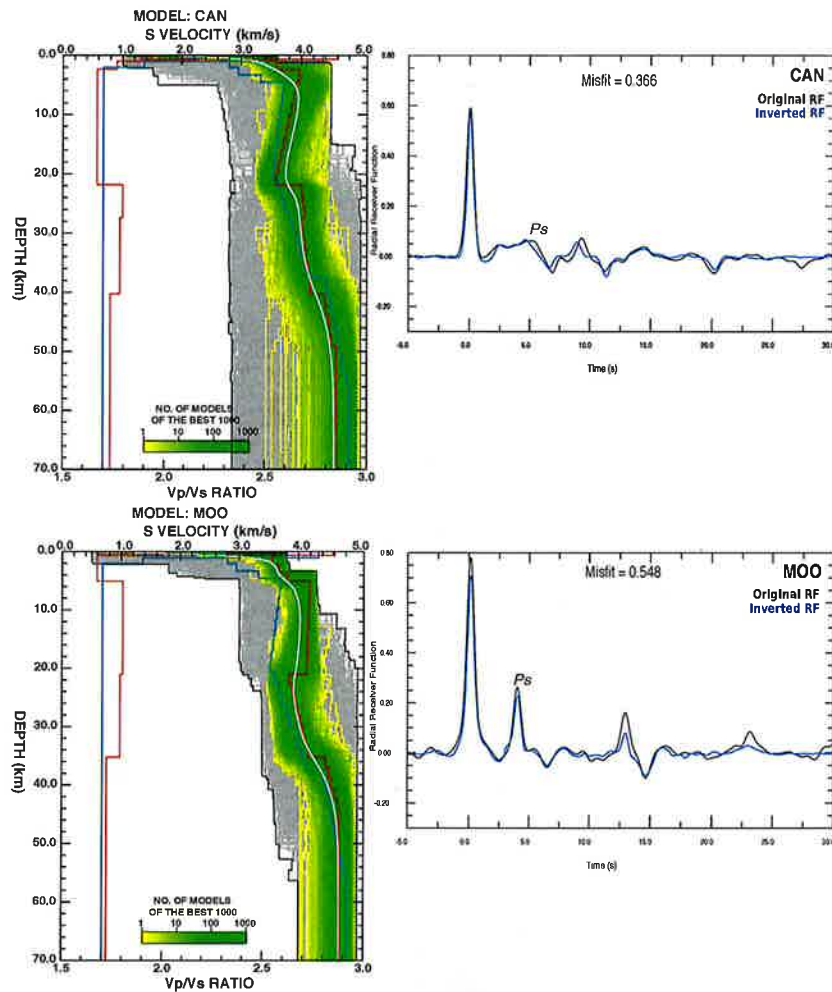

828  
 829

830 Figure 7: (Left) Seismic velocity models for CAN and MOO stations obtained from the neighbourhood algorithm  
 831 (Sambridge 1999a). The grey area indicates all the models searched by the algorithm. The best 1000 models are  
 832 indicated by the yellow to green colours; the best one (smallest misfit) corresponds to the red line, both for  $S$ -wave  
 833 velocity and  $V_p/V_s$  ratio and the white line is the average velocity model. (Right) Waveform matches between the  
 834 observed stacked receiver functions (black) and predictions (blue) based on the best models.

835

describe how to  
 read the double axes  
 for the top and the bottom.  
 NOT labeling the 2.5 and 3.0.  
 $V_p/V_s$  ratio would send a  
 clear message that the leftmost  
 pair of curves are the ones to which  
 the lower axis applies

what measure, and unit  
 of misfit, are you using here  
 (if it is the  $\chi^2$  that you discuss  
 in the text, you have to state that  
 and stick with it)

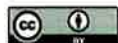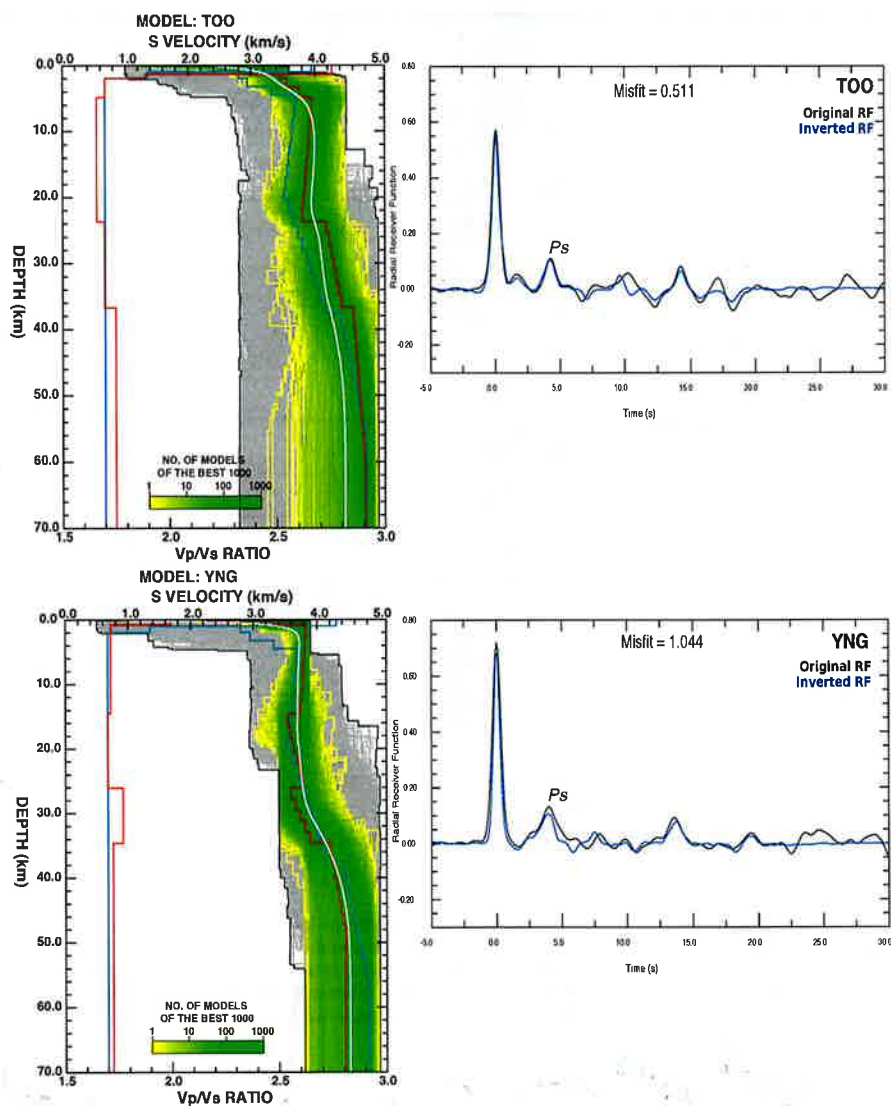

Figure 8: (Left) Seismic velocity models for stations TOO and YNG obtained from the neighbourhood algorithm. (Right) Comparison between the observed stacked and the predicted receiver functions from the NA inversion. See Figure 7 caption for more details.

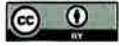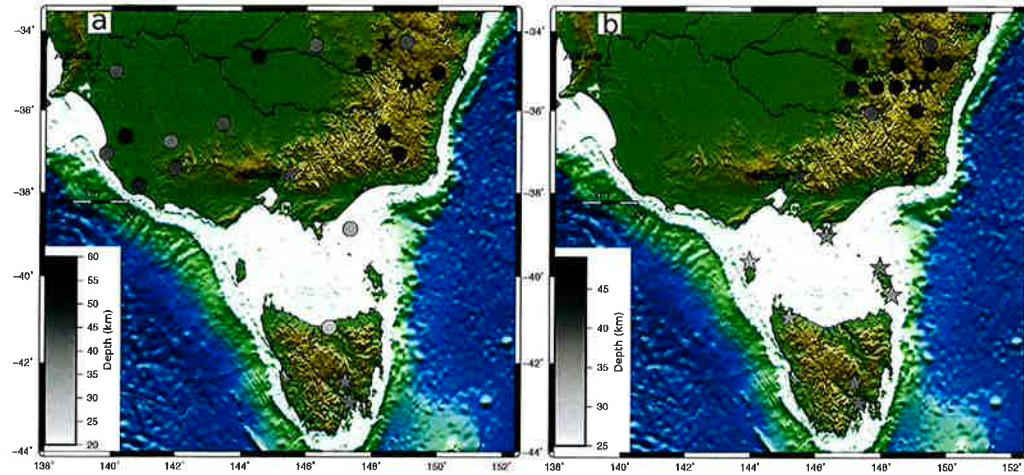

Figure 9: (a) Map showing crustal thickness variations based on the S-wave velocity inversion results of this study (stars) and previous studies (octagons) (Fontaine et al., 2013; Shibitani, 1996; Collins, 1991) and (b) comparison of crustal thickness variations based on the  $H$ - $\kappa$  grid search results of this study (stars) and previous results from the study of Tkalčić et al. (2012) (octagons). Topography/bathymetry is based on the Etopo1 dataset (Amante and Eakins, 2009).

I can't make much of the gradations of colors. While the numbers, give us a table, let us appreciate the difference
